# Supplementary material for: Human Peripheral Blood Mononucleocyte Derived Myeloid Committed Progenitor Cells Mitigate H-ARS by Exosomal Paracrine Signal
Source: Int J Mol Sci. 2022 May 14;23(10):5498. doi: 10.3390/ijms23105498 (PMC9142131; doi:10.3390/ijms23105498)
Supplement: Supplementary file 1 [file ijms-23-05498-s001.zip › ijms-1687506-supplementary.pdf]

## Supplementary Figure: 1

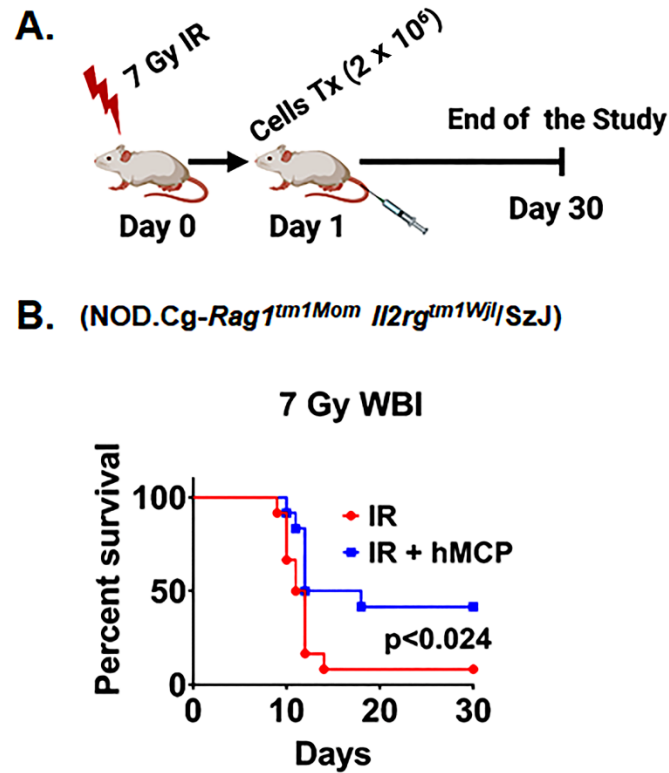

**Supplementary Figure S1:** Single dose of hMCP cell transplantation in mice following whole body irradiation. (A) Schematic representation of survival study experimental plan (radiation dose and timeline for cell transplantation). Mice receiving hMCP cells at 24 hours after irradiation (B) Kaplan-Meier survival (Mantel-Cox) analysis of *NOD.Cg-Rag1*<sup>tm1Mom</sup> *Il2rg*<sup>tm1Wjl</sup>/SzJ (NRG) mice showed 41.6% of survival in IR+hMCP single dose transplanted group compared to IR group. ( $p < 0.024$ ). (n = 12 mice per group).

## Supplementary Figure: 2

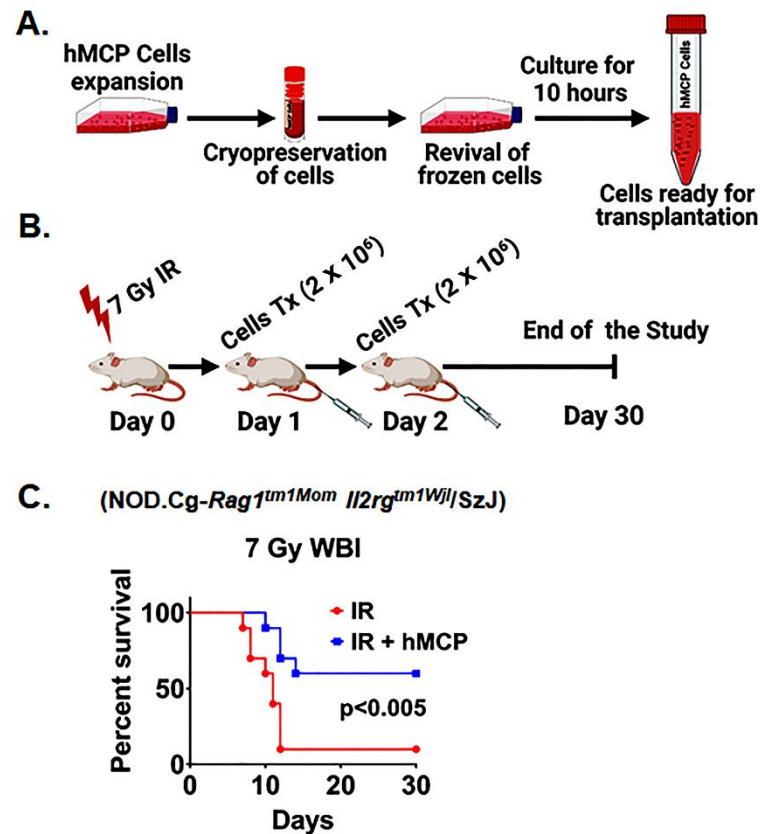

**Supplementary Figure S2:** Functional efficacy of frozen and thawed hMCP cell transplantation improves survival of mice following whole body irradiation. (A) Schematic representation of hMCP cells preparation for transplantation in mice after cryopreservation and revival of cells (B) Survival study experimental plan (radiation dose and timeline for cell transplantation). Mice receiving hMCP cells prepared from cryopreserved vials at 24 and 48 hours after irradiation (C) Kaplan-Meier survival analysis of *NOD.Cg-Rag1<sup>tm1Mom</sup> Il2rg<sup>tm1Wjl</sup>/SzJ* (NRG) mice showed 60% of survival ( $p < 0.005$ ) in IR+hMCP transplanted group compared to IR group (10% survival). (n = 10 mice) per group.

Supplementary Figure: 3

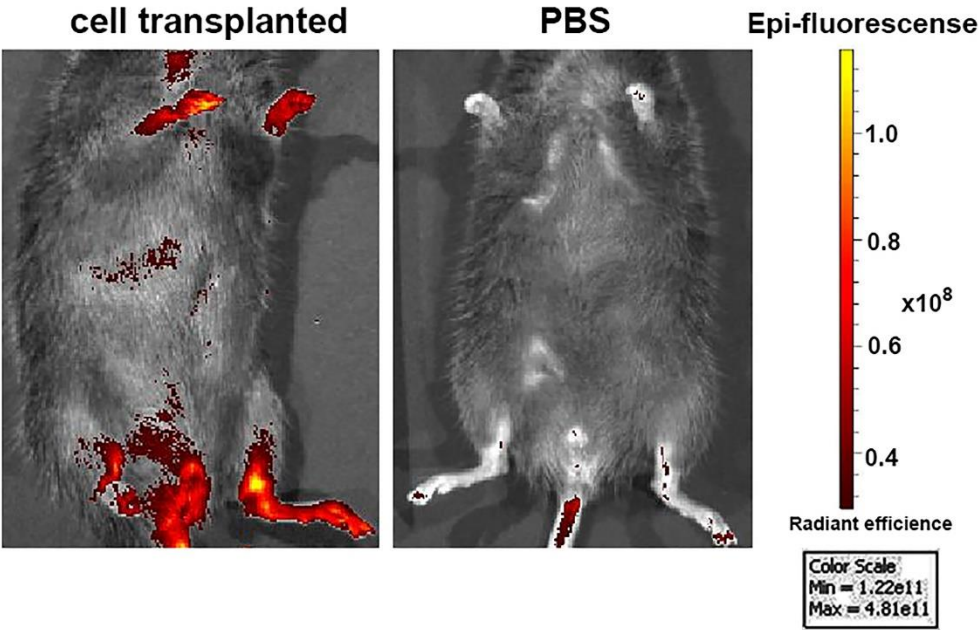

Supplementary Figure S3: In-vivo imaging system shows hMCP cells primarily located into lung and bone-marrow of mice.

Supplementary Figure: 4

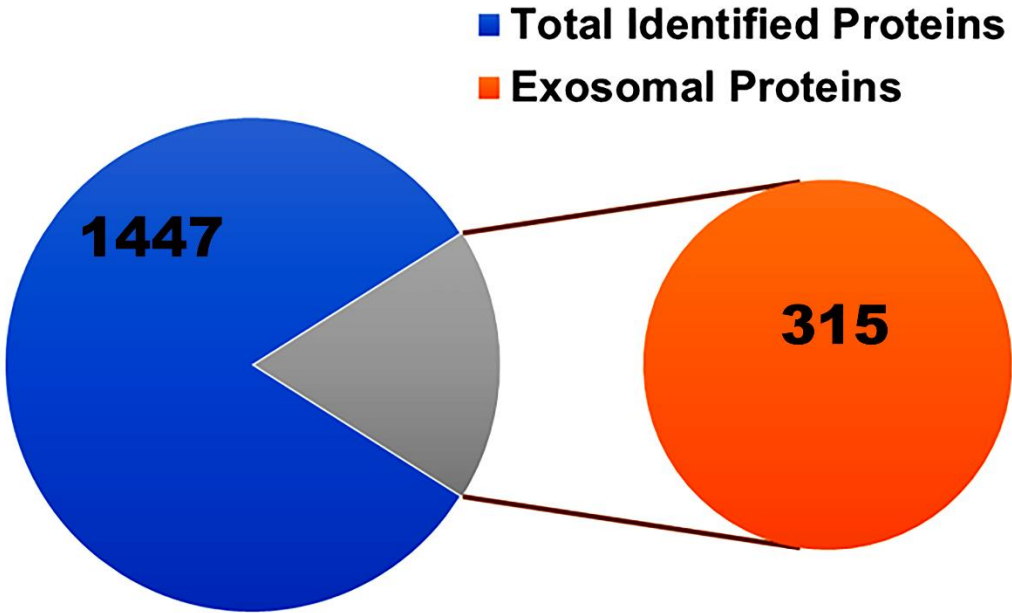

**Supplementary Figure S4:** Proteomics analysis of hMCP conditioned media shows that out of 1447 total identified proteins, 315 (21.8%) are exosomal proteins.

Supplementary Figure: 5

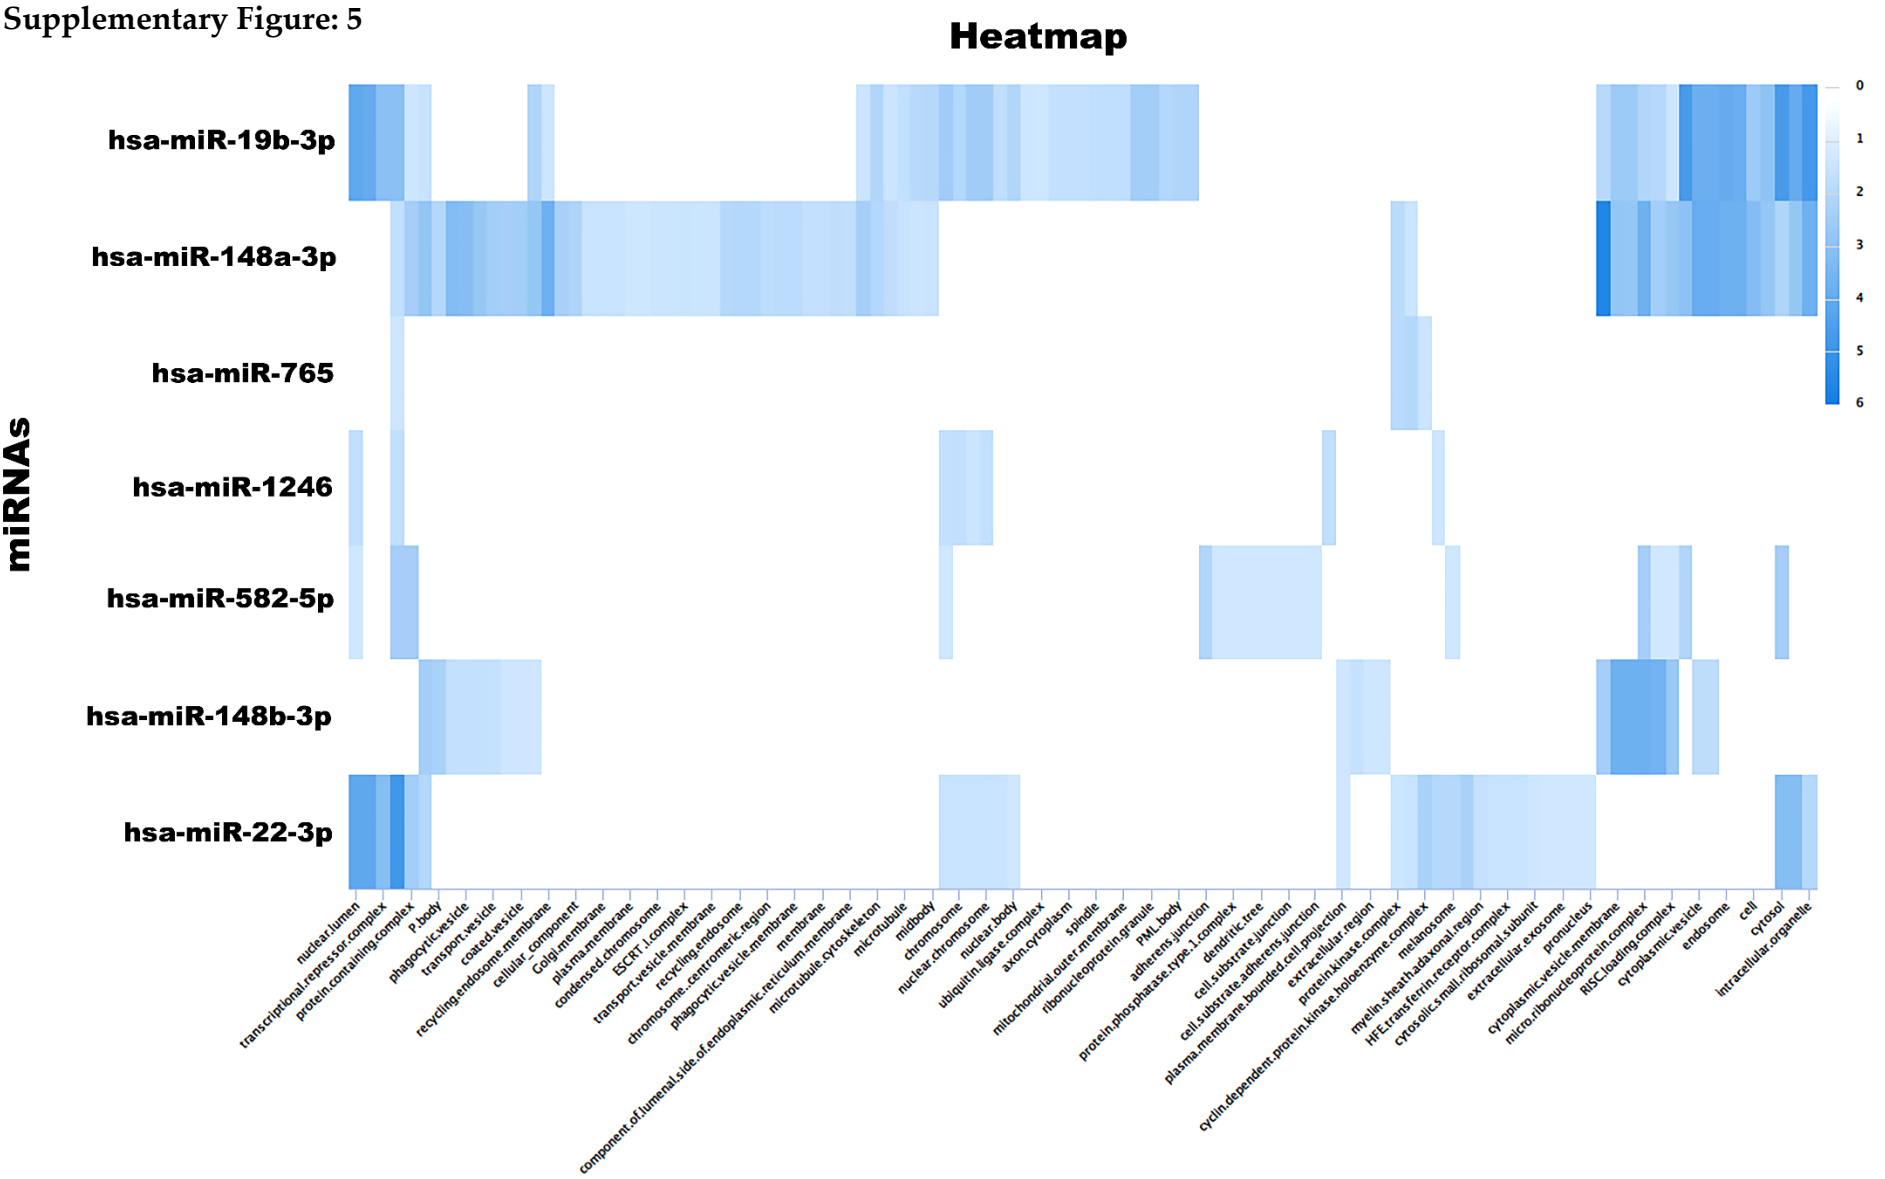

**Supplementary Figure S5:** Gene Ontology (GO) analysis of shortlisted exosomal-miRNA analyzed by miRPathDB v2.0. revealed various cellular components involved in HSCs Proliferation.



### Supplementary Figure: 7

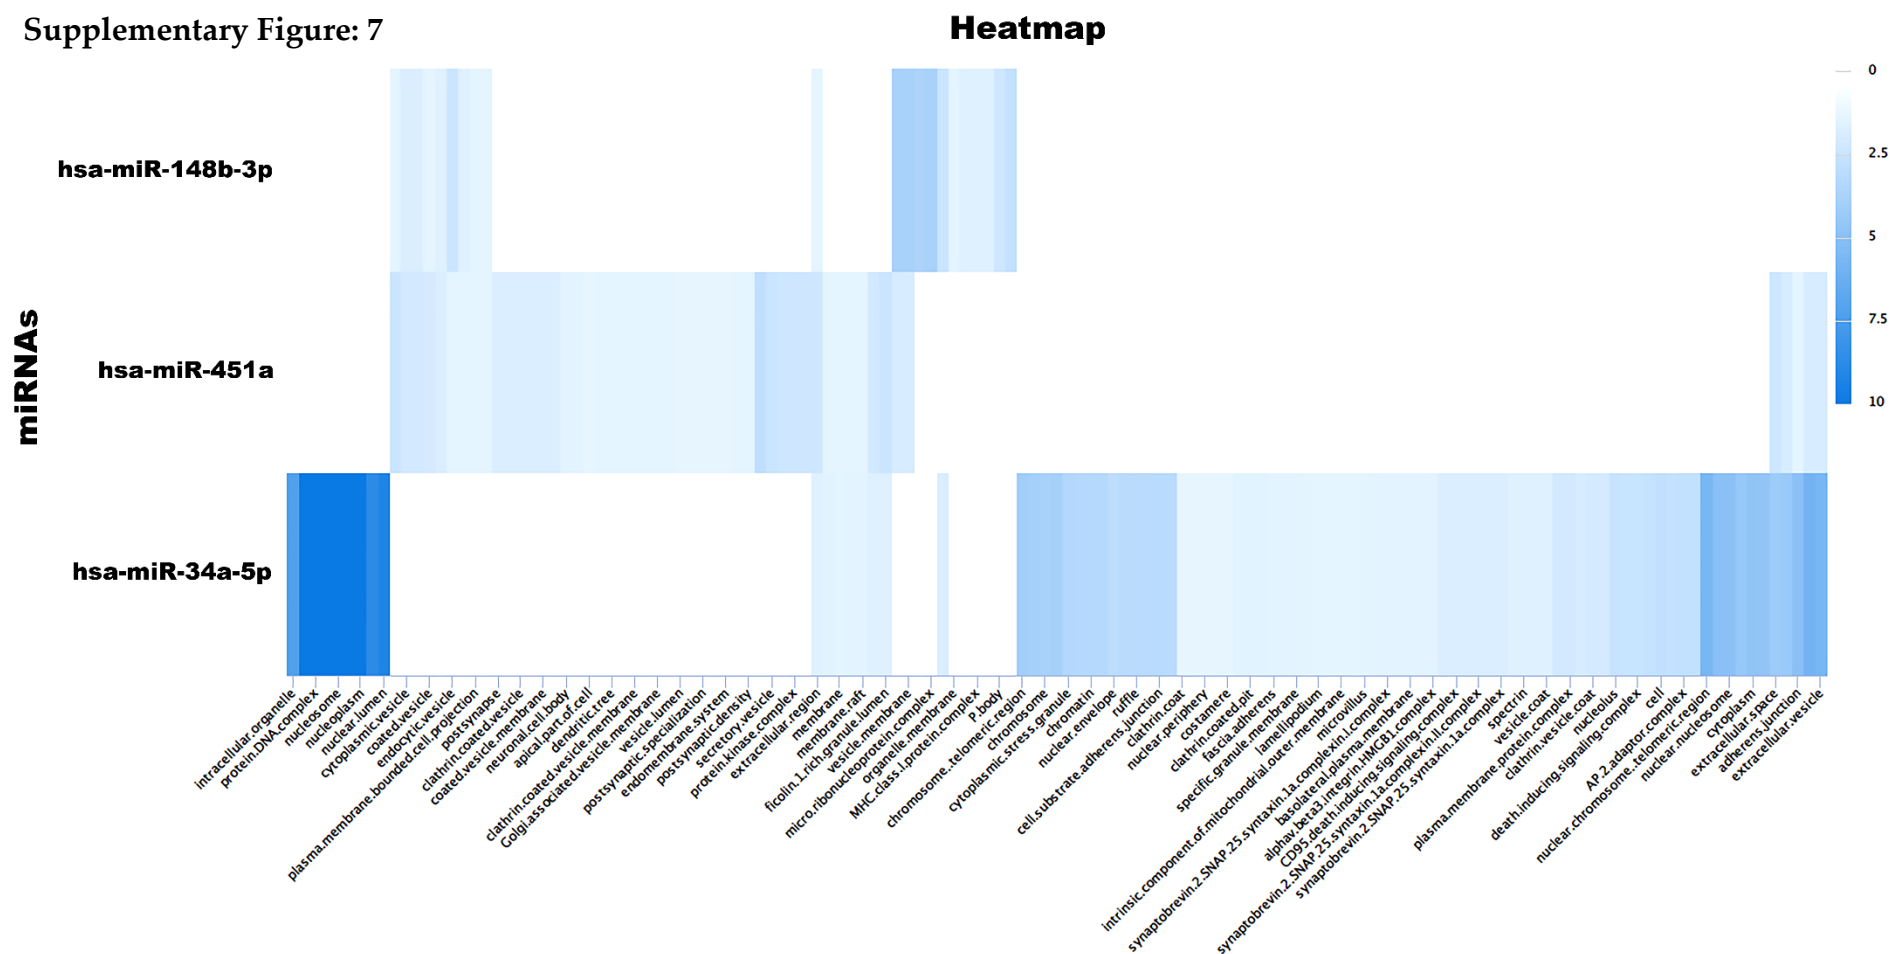

**Supplementary Figure S7:** Gene Ontology (GO) analysis of shortlisted exosomal-miRNA analyzed by miRPathDB v2.0. revealed various cellular components involved in HSCs lineages.

## Supplementary Figure: 8

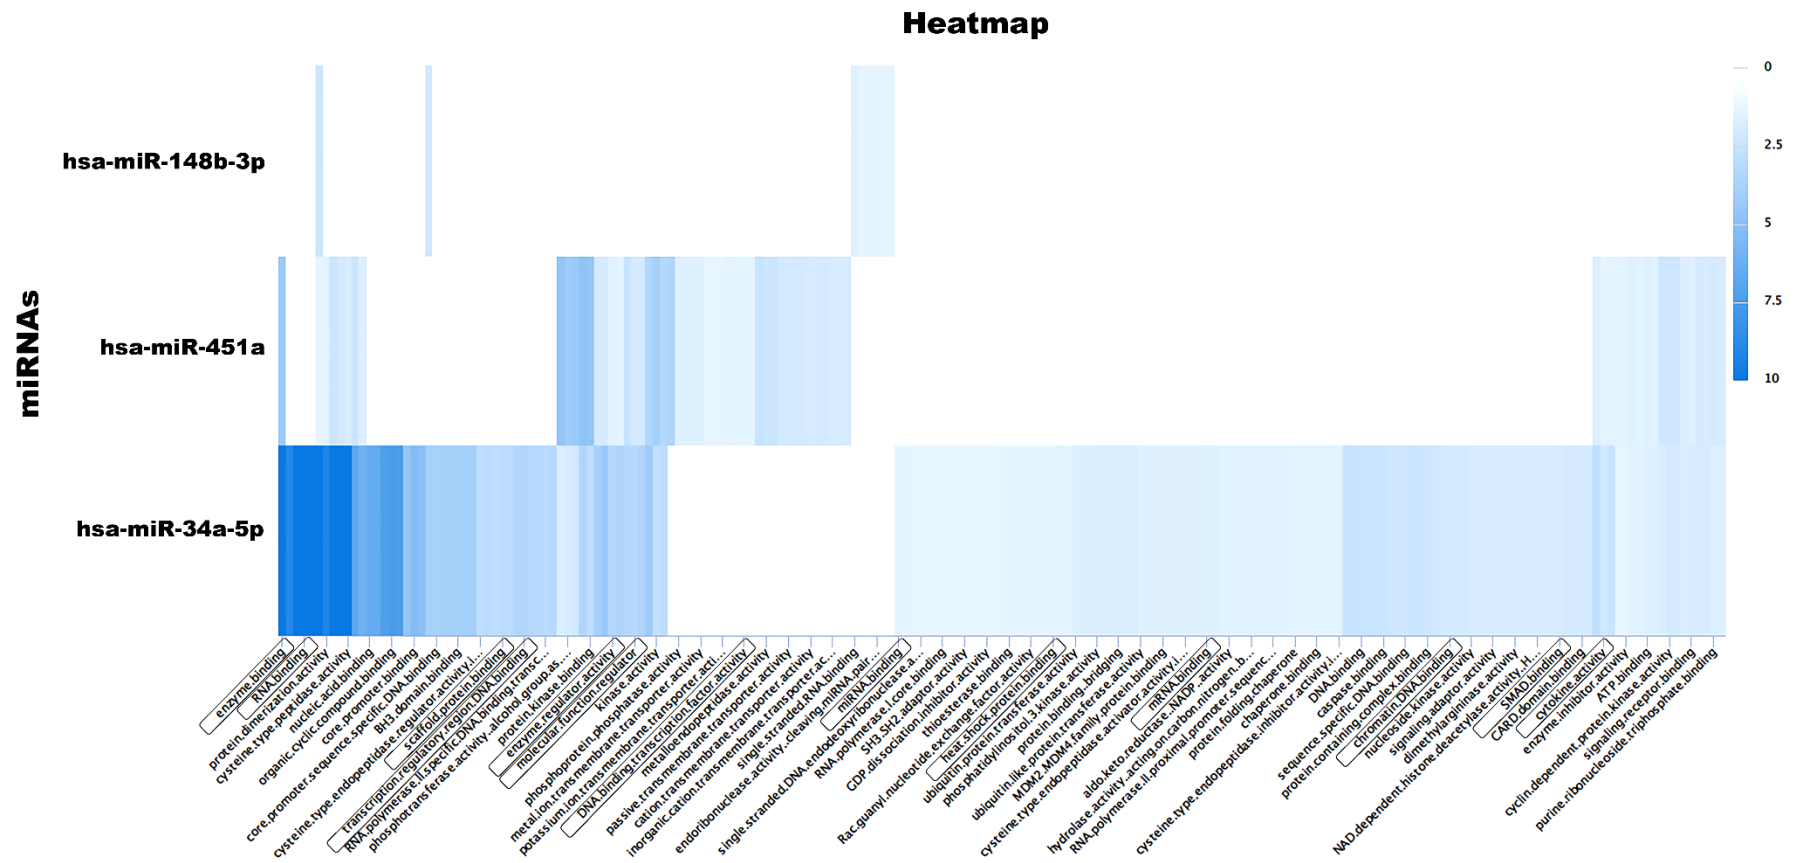

**Supplementary Figure S8:** Gene Ontology (GO) analysis of shortlisted exosomal-miRNA analyzed by miRPathDB v2.0. revealed various important molecular functions (highlighted by rectangular box) such as enzyme binding, RNA binding, scaffold protein binding, molecular function regulator, miRNA binding, heat shock protein binding, mRNA binding, chromatin DNA binding, cytokine activity etc. involved in HSCs lineages.

Supplementary Figure: 9

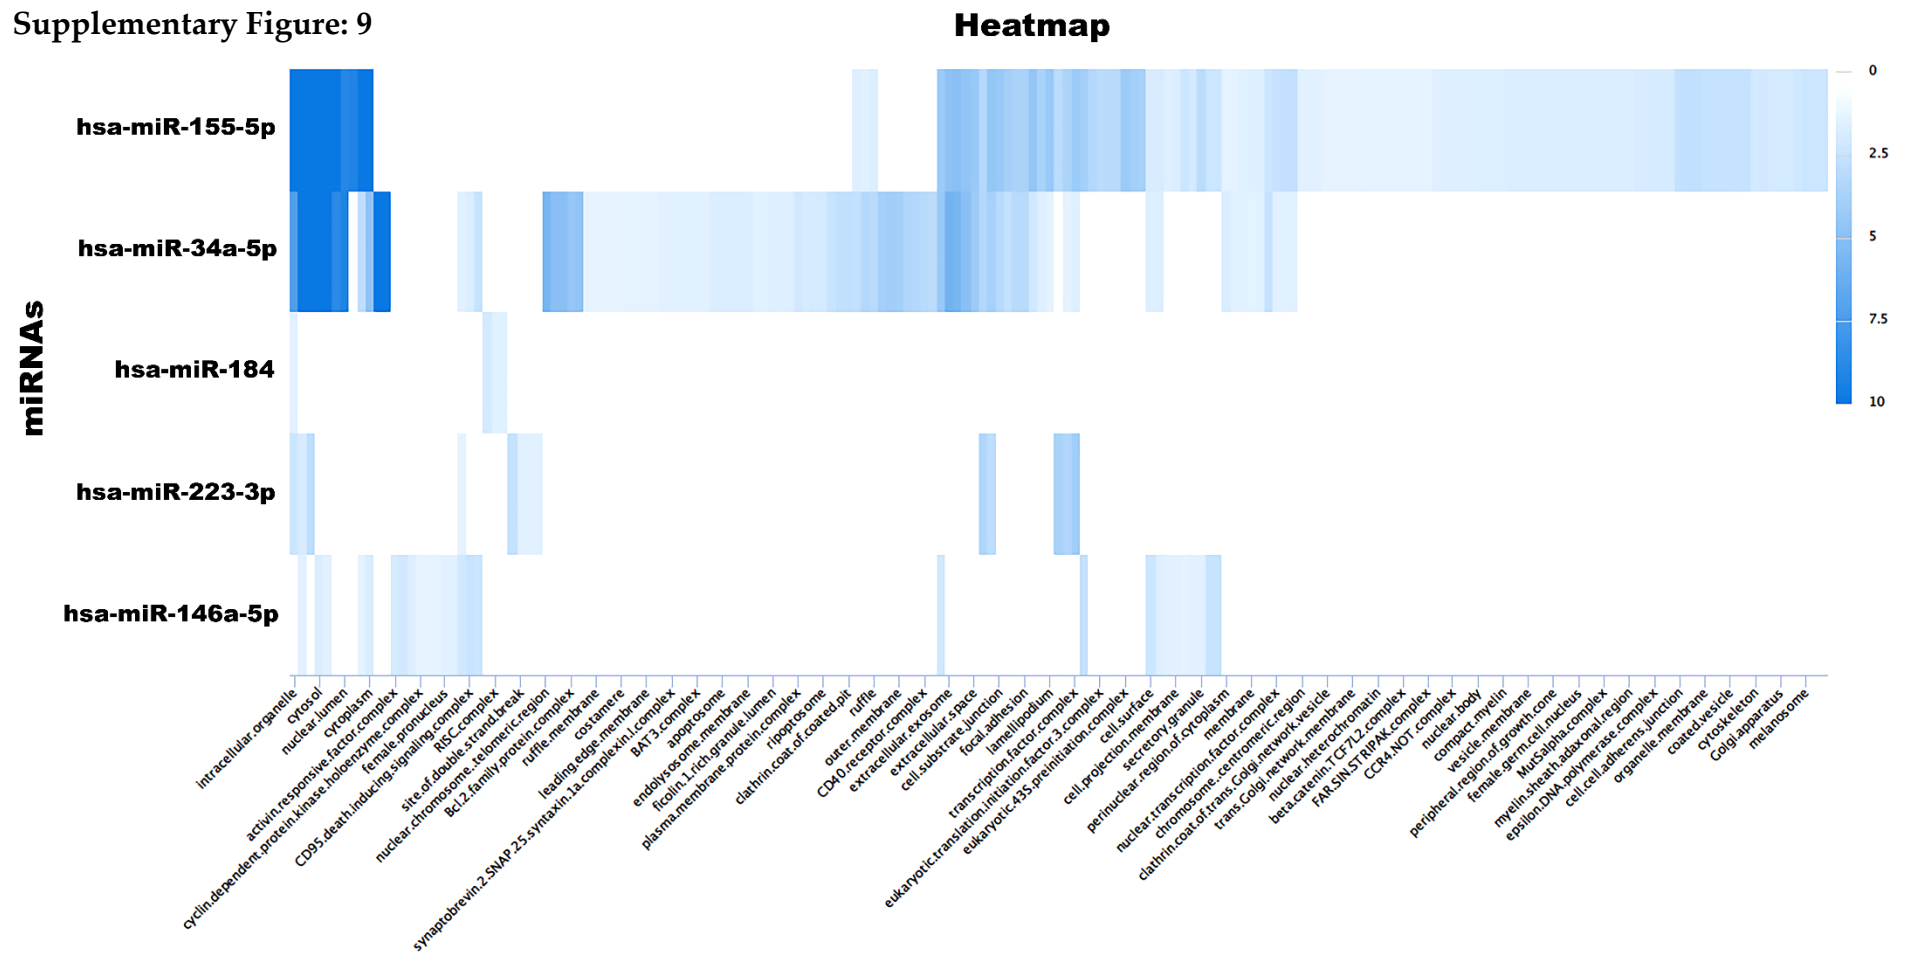

**Supplementary Figure S9:** Gene Ontology (GO) analysis of shortlisted exosomal-miRNA analyzed by miRPathDB v2.0. revealed various cellular components involved in HSCs differentiation.

Supplementary Figure: 10

Heatmap

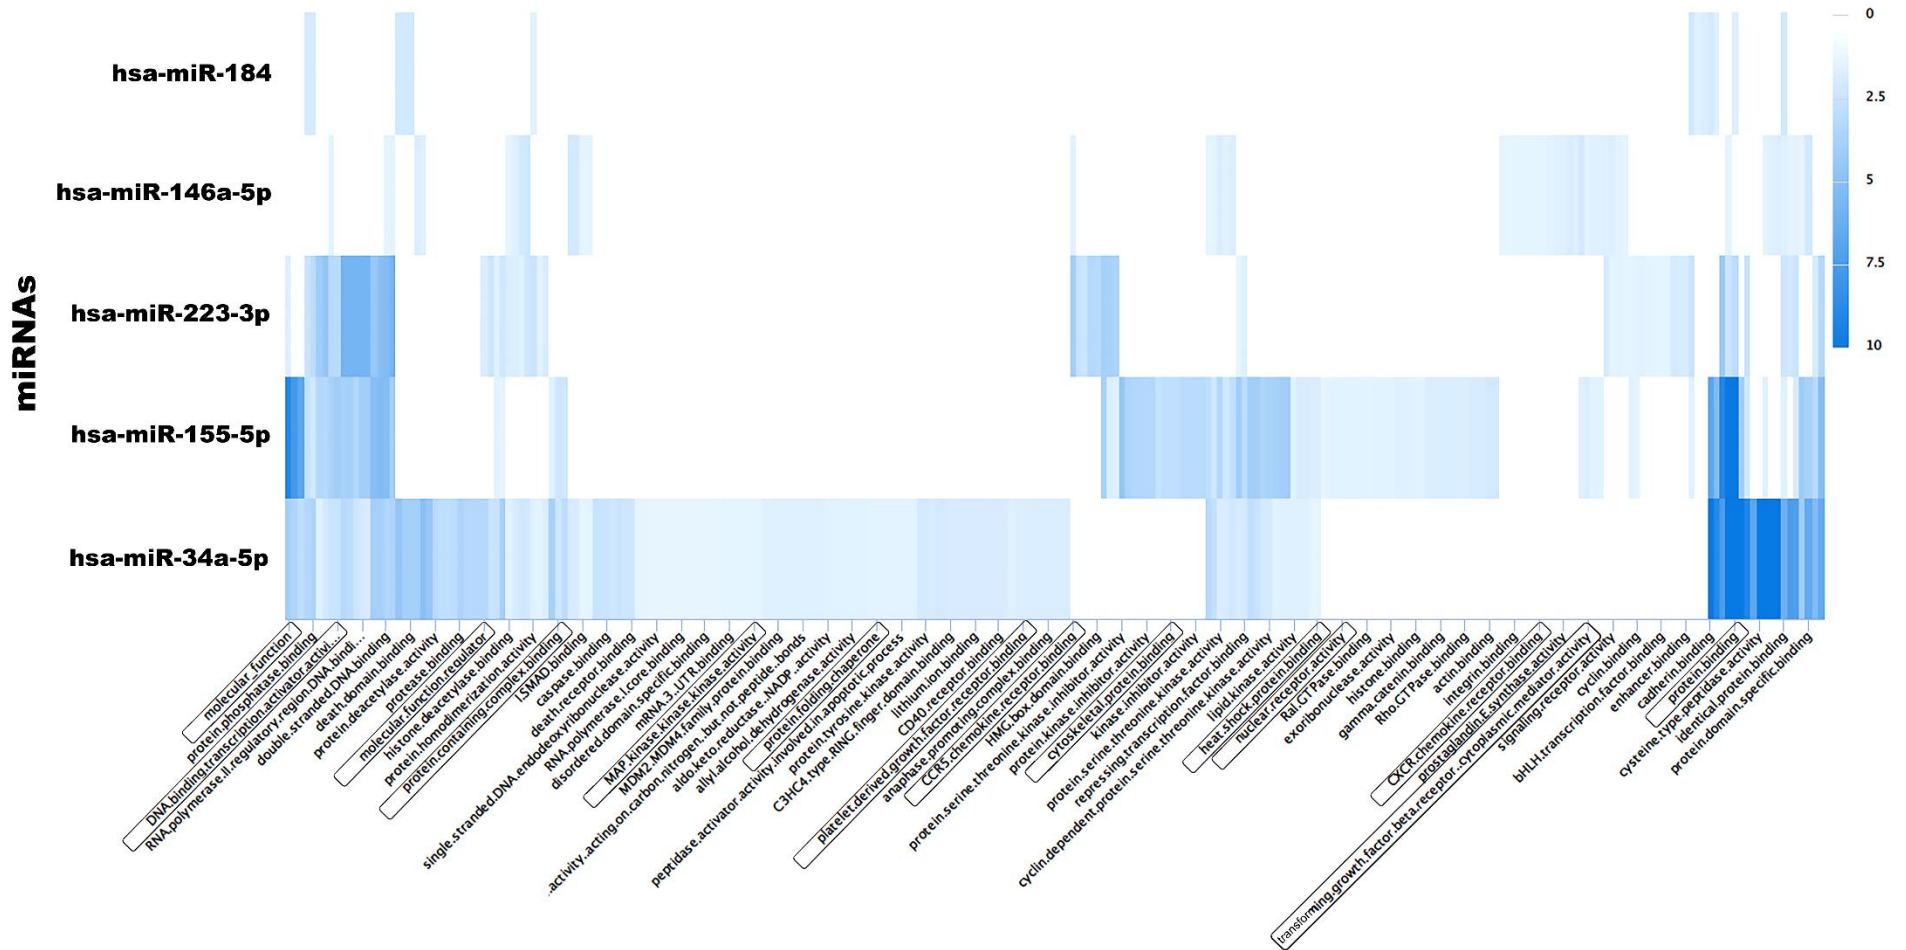

**Supplementary Figure S10:** Gene Ontology (GO) analysis of shortlisted exosomal-miRNA analyzed by miRPathDB v2.0. revealed various important molecular functions (highlighted by rectangular box) such as DNA binding transcription activator activity, molecular function regulator, protein containing complex binding, MAP kinase activity, platelet derived growth factor receptor binding, CCR5 chemokine receptor binding, cytoskeletal protein binding, heat shock protein binding, CXCR chemokine receptor binding, transforming growth factor beta receptor cytoplasmic mediator activity etc. involved in HSCs differentiation.

Supplementary Figure: 11

## Heatmap

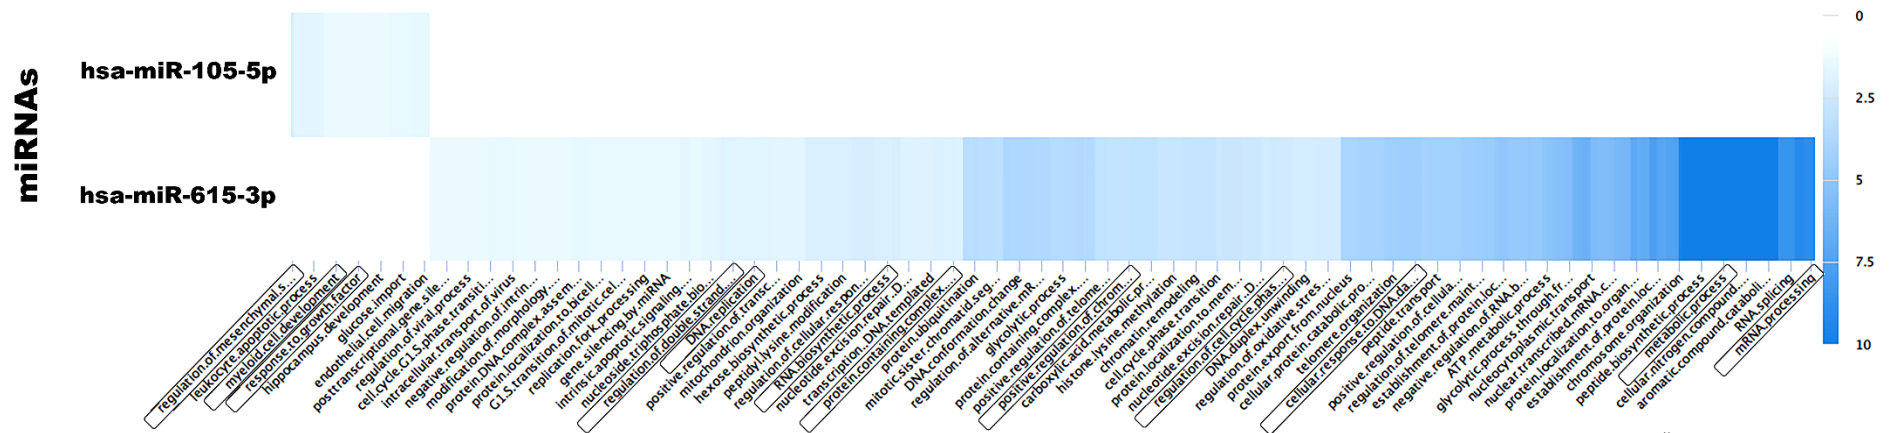

**Supplementary Figure S11:** Gene Ontology (GO) analysis of shortlisted exosomal-miRNA analyzed by miRPathDB v2.0. revealed various biological functions (highlighted by rectangular box) such as myeloid cells development, response to growth factor, DNA replication, RNA biosynthetic process, protein containing complex, positive regulation of chromatin, cellular response to DNA damage, metabolic process, mRNA processing etc. involved in regulation of HSCs differentiation.

Supplementary Figure: 12

## Heatmap

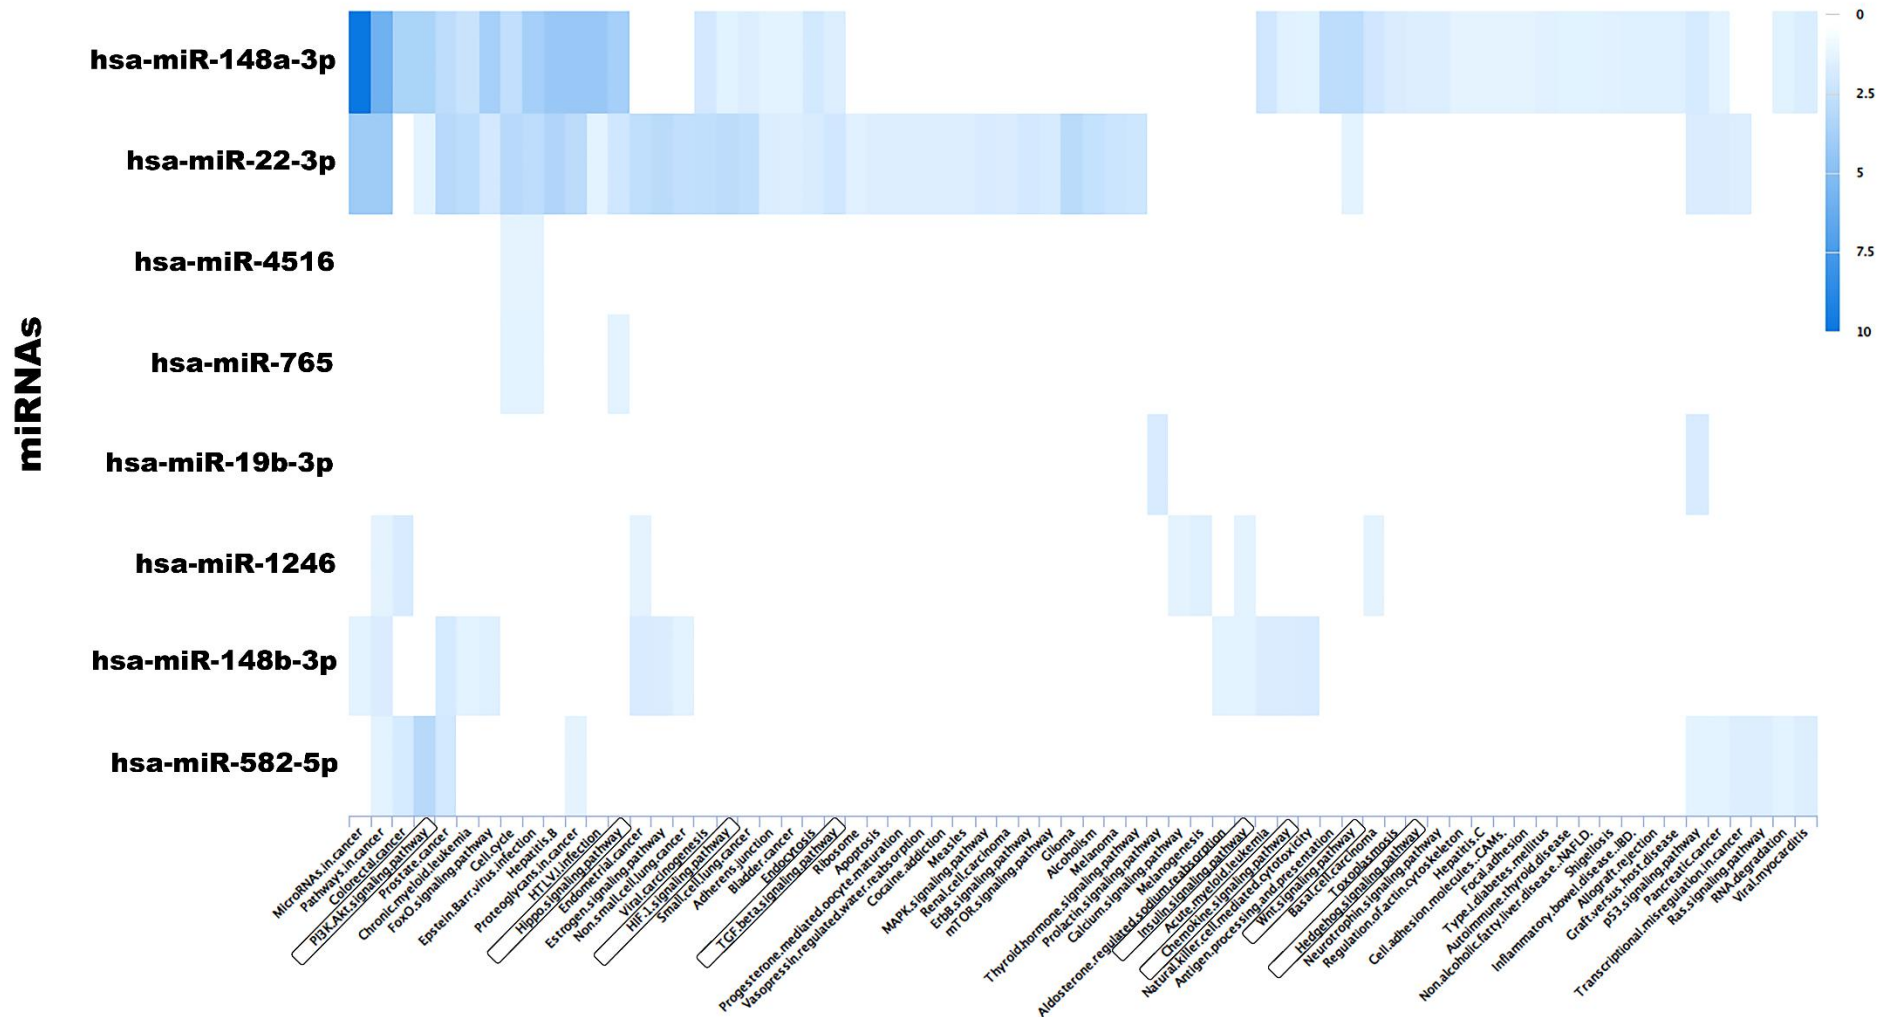

**Supplementary Figure S12:** KEGG analysis of shortlisted exosomal-miRNA analyzed by miRPathDB v2.0 revealed target signaling pathways (highlighted by rectangular box) such as PI3K-Akt signaling pathway, Hippo signaling pathway, HIF-1 signaling pathway, TGF-  $\beta$  signaling pathway, insulin signaling pathway, Wnt signaling pathway, Hedgehog signaling pathway etc. involved in HSCs proliferation.

Supplementary Figure: 13

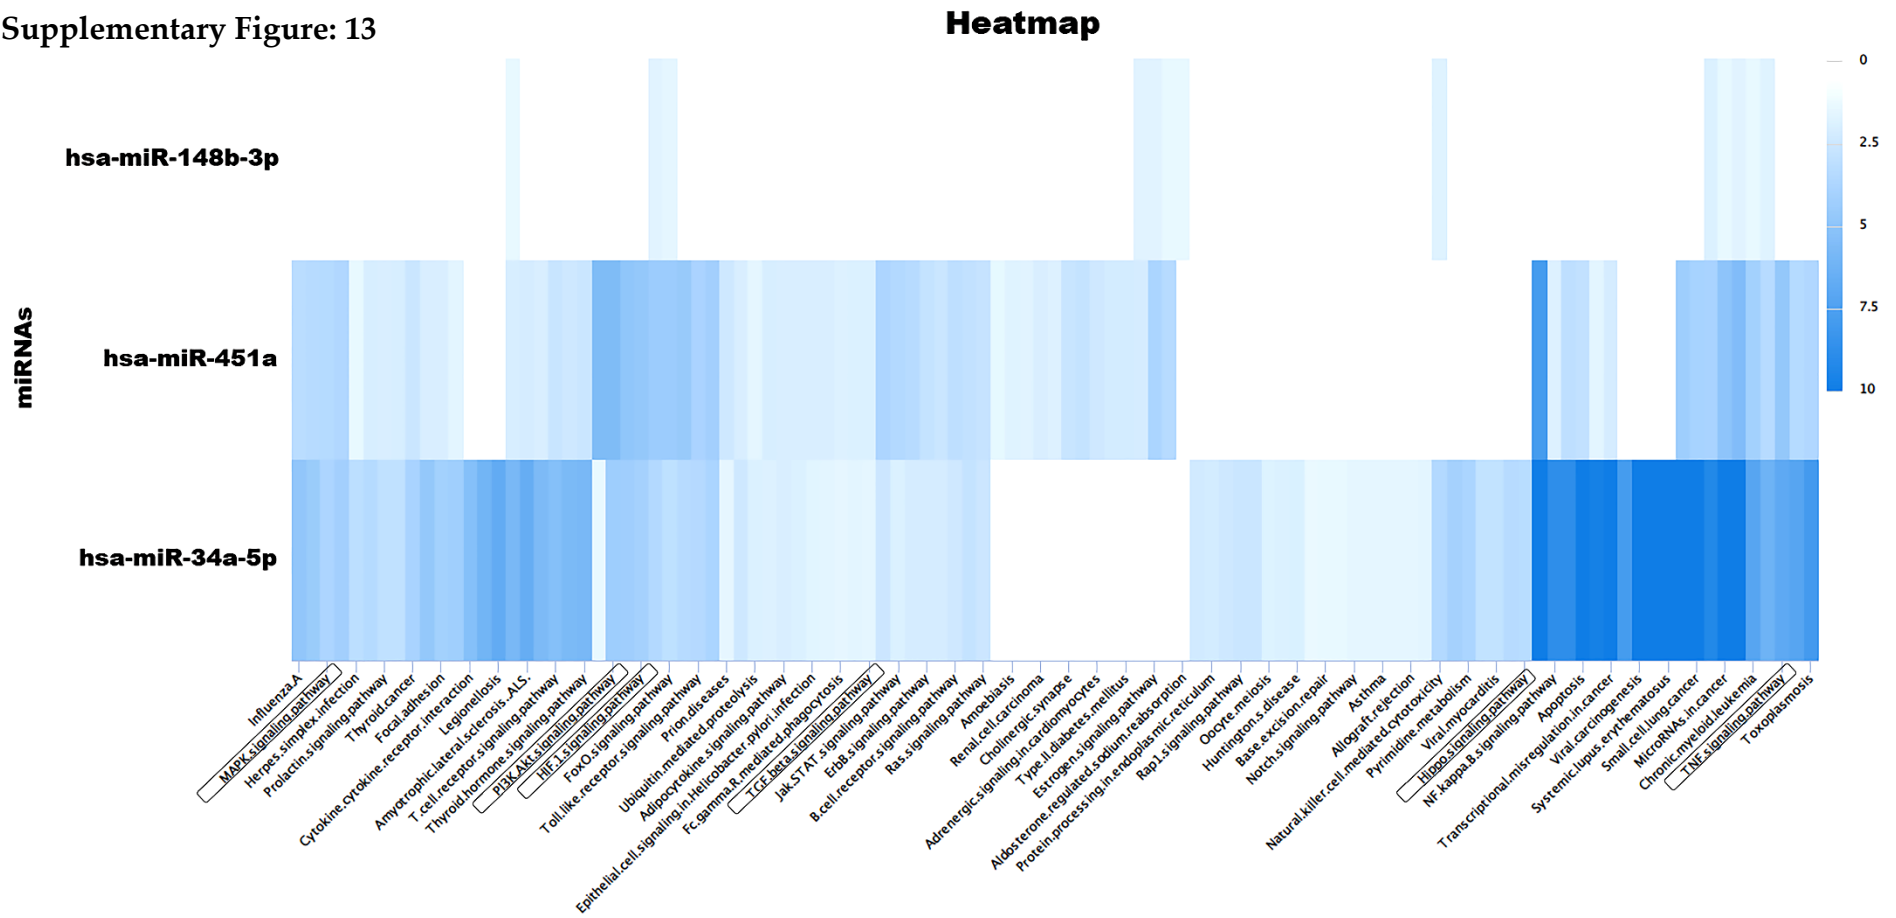

**Supplementary Figure S13:** KEGG analysis of shortlisted exosomal-miRNA analyzed by miRPathDB v2.0 revealed target signaling pathways (highlighted by rectangular box) such as MAPK signaling pathway, PI3K-Akt signaling pathway, HIF-1 signaling pathway, TGF-  $\beta$  signaling pathway, Hippo signaling pathway, TNF signaling pathway etc. involved in HSCs lineage.

Supplementary Figure: 14

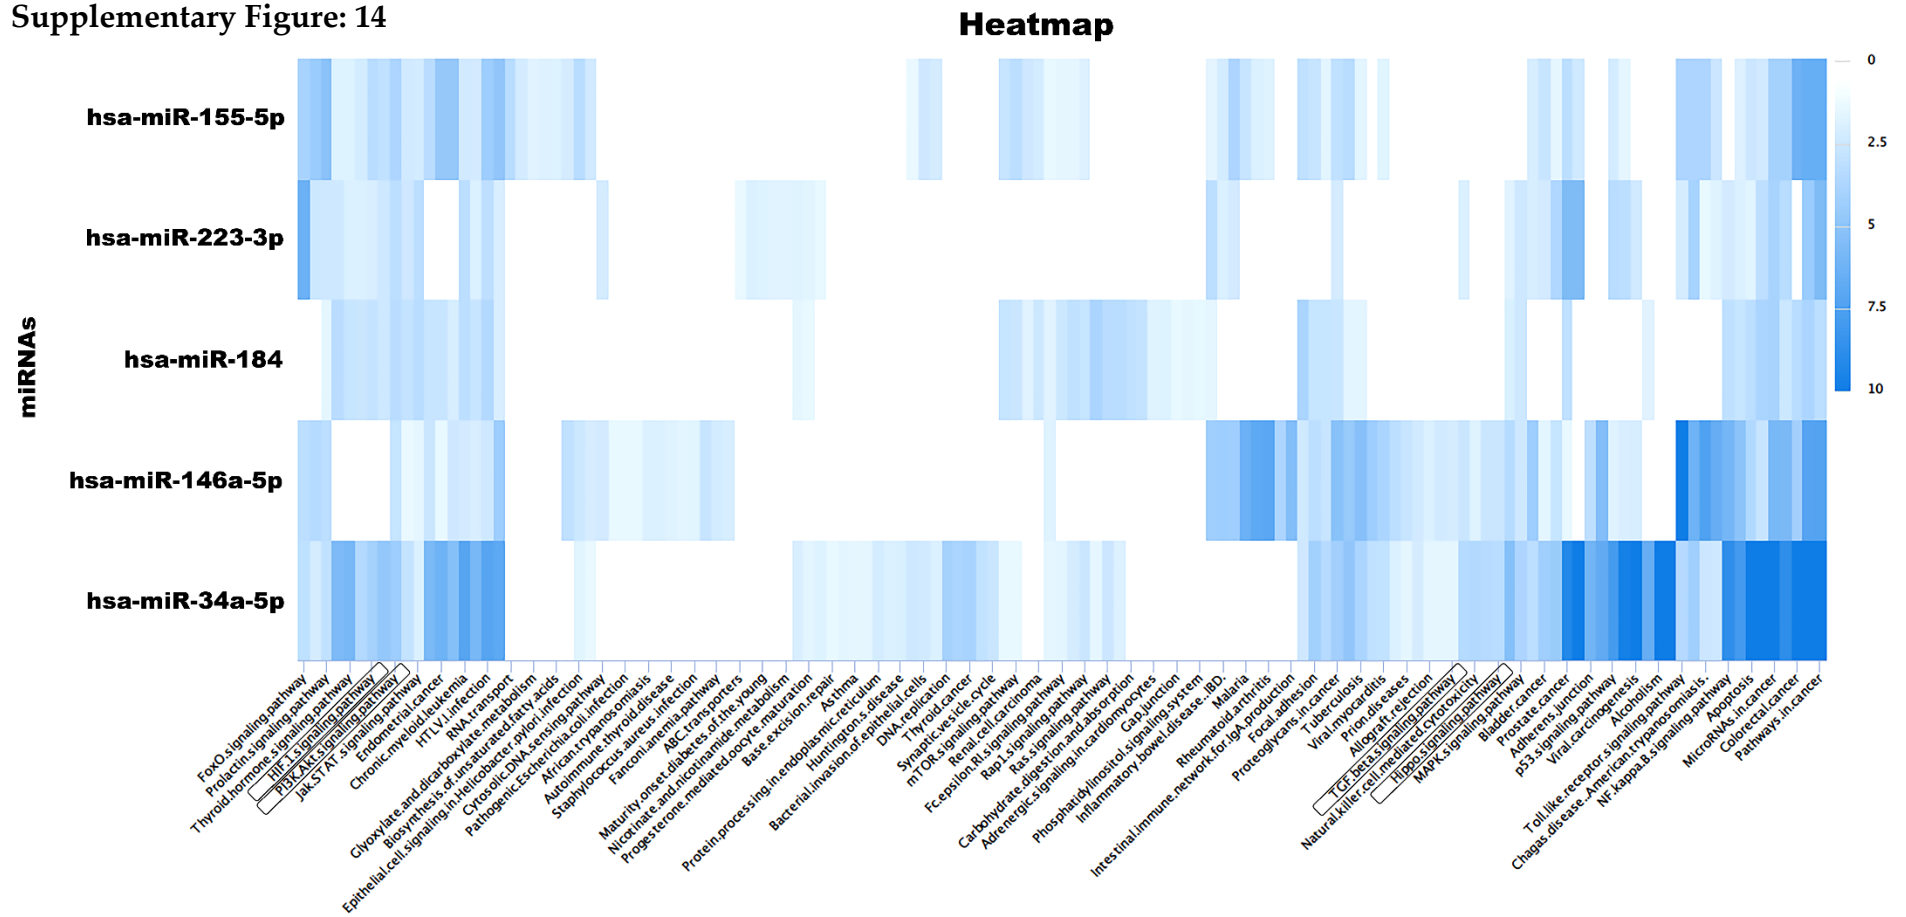

**Supplementary Figure S14:** KEGG analysis of shortlisted exosomal-miRNA analyzed by miRPathDB v2.0 revealed target signaling pathways (highlighted by rectangular box) such as HIF-1 signaling pathway, PI3K-Akt signaling pathway, TGF-  $\beta$  signaling pathway, Hippo signaling pathway etc. involved in HSCs differentiation.

Supplementary Figure: 15

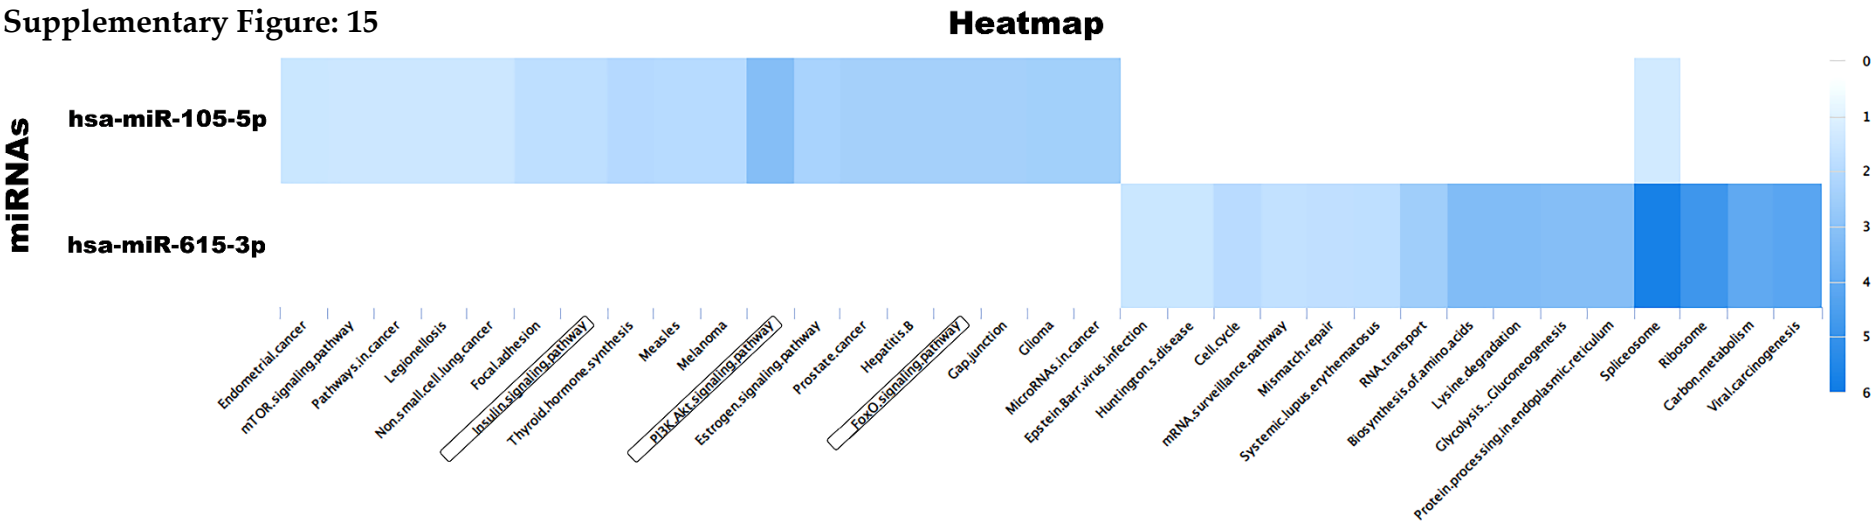

**Supplementary Figure S15:** KEGG analysis of shortlisted exosomal- miRNA analyzed by miRPathDB v2.0 revealed target signaling pathways (highlighted by rectangular box) such as Insulin signaling pathway, PI3K-Akt signaling pathway, FoxO signaling pathway etc. involved in regulation of HSCs differentiation.

## Supplementary Figure: 16

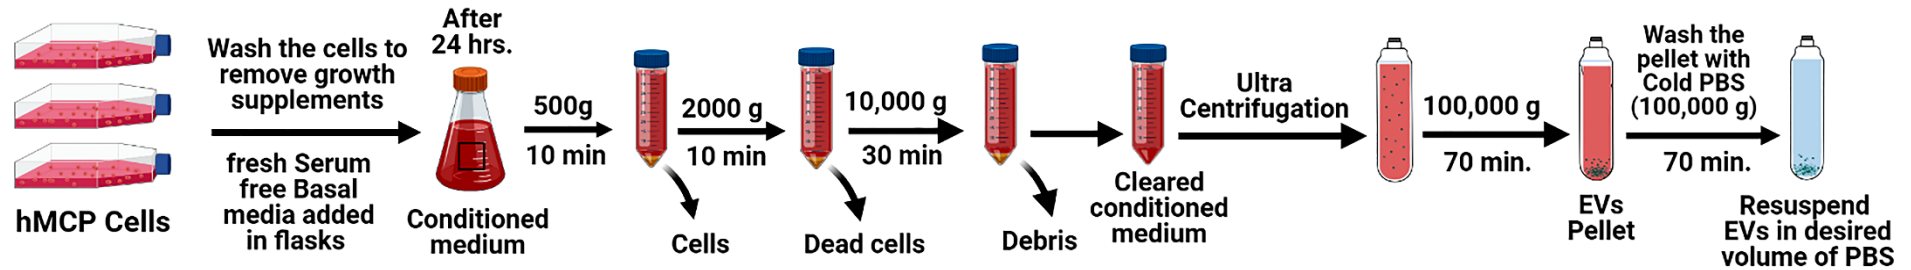

**Supplementary Figure S16: A detailed schematic diagram for EVs isolation from hMCP conditioned media using Ultracentrifugation method.** For expansion of hMCP cells were cultured at a density of  $16-18 \times 10^3$  cells per  $\text{cm}^2$  in T175  $\text{cm}^2$  flasks with 20ml of cell expansion media StemSpan™-XF with addition of StemSpan™ CD34+ Expansion Supplement and antibiotics. After 4 days of expansion the cells culture output was  $52-55 \times 10^3$  cells per  $\text{cm}^2$ . cells were washed with PBS two to three times followed by a final wash with supplement free Basal media for complete removal of cell expansion medium and antibiotics. Next 24 hours these hMCPs ( $52 \times 10^3$  cells per  $\text{cm}^2$ ) were incubated with supplement free Basal media. After 24 hours conditioned media were collected for further in vivo and in vitro applications. Cells incubated over 24hours without growth supplement showed 82.4% viability with the concentration of  $42.8 \times 10^3$  cells per  $\text{cm}^2$ . Conditioned media collected from different flasks and passage 4 and 5 pooled together and centrifuged at 500g for 10min at  $4^\circ\text{C}$  to remove the cells. Cell free conditioned media was frozen at  $-80^\circ\text{C}$  until further use. hMCP cells were routinely performed for mycoplasma contamination testing. All the cells used in this study were negative for mycoplasma contamination.

Before EVs isolation pooled frozen conditioned media were thaw at  $4^\circ\text{C}$  overnight and centrifuge two time at 2000g for 10 min and 10,000g for 30 min to remove dead cells and debris respectively before performing Ultracentrifugation steps. Cleared conditioned media were transferred to Open-Top Polyclear centrifuge tubes (Seton Scientific, USA, Part no. 7052) and fixed in Ultracentrifuged rotor (Superspin 630) bucket (Cat no. 79365) and Ultracentrifuge at  $4^\circ\text{C}$ , 100,000g for 70minutes with rotor adjusted K factor 257. Supernatant was discarded and EVs pellet were washed with sterile cold PBS by centrifugation at  $4^\circ\text{C}$ , 100,000g for 70minutes. Final EV pellets were resuspended in desired volume of sterile PBS for immediate use or stored at  $-80^\circ\text{C}$  until further use. EVs were further analyzed by using flowcytometry to determine EV associated proteins. EV Particle size and number was determined by Nanosight Tracking Assay (LM10, Malvern Inst. Ltd., UK). EV concentration was also determined by total protein estimation using BCA method.

**Supplementary Table S1: List of Primers**

| <b>Gene</b>      | <b>Forward primer (5'-3')</b> | <b>Reverse primer (5'-3')</b> |
|------------------|-------------------------------|-------------------------------|
| Human CD33       | TTCCTCCTGTGGGTCTTCAC          | CTTTCCAGGAGATGGCTCAG          |
| Human NRG-3      | TGCCGAGACAAGGACCTTGCAT        | TCACAACGGACTCCTTGGTAGC        |
| Human Tnfrs-11a  | GAAGGTTGGCTGGACAGGAGTT        | CGCATCGGATTTCTCTGTCCCA        |
| Human Beta Actin | TGGATCAGCAAGCAGGAGTATG        | GCATTTGCGGTGGACGAT            |

Supplementary Table S2a: Presence of Exosomal Proteins in Total Identified Proteins:

| Total Identified Proteins from<br>hMCP Conditioned Media | Presence of Exosomal Protein<br>in total identified proteins (0=<br>Non-exosomal proteins, 1=<br>Exosomal Proteins) | Total<br>Identified<br>Proteins | Exosomal<br>Protein |
|----------------------------------------------------------|---------------------------------------------------------------------------------------------------------------------|---------------------------------|---------------------|
| Entrez Gene ID                                           |                                                                                                                     |                                 |                     |
| 280717                                                   | 1                                                                                                                   | 1447                            | 315                 |
| 213                                                      | 1                                                                                                                   |                                 |                     |
| 4627                                                     | 0                                                                                                                   |                                 |                     |
| 2316                                                     | 1                                                                                                                   |                                 |                     |
| 7018                                                     | 0                                                                                                                   |                                 |                     |
| 7094                                                     | 0                                                                                                                   |                                 |                     |
| 3936                                                     | 0                                                                                                                   |                                 |                     |
| 4353                                                     | 0                                                                                                                   |                                 |                     |
| 7086                                                     | 0                                                                                                                   |                                 |                     |
| 87                                                       | 1                                                                                                                   |                                 |                     |
| 7431                                                     | 0                                                                                                                   |                                 |                     |
| 81                                                       | 1                                                                                                                   |                                 |                     |
| 8826                                                     | 0                                                                                                                   |                                 |                     |
| 9961                                                     | 0                                                                                                                   |                                 |                     |
| 60                                                       | 1                                                                                                                   |                                 |                     |
| 3309                                                     | 0                                                                                                                   |                                 |                     |
| 2821                                                     | 1                                                                                                                   |                                 |                     |
| 4478                                                     | 0                                                                                                                   |                                 |                     |
| 7057                                                     | 0                                                                                                                   |                                 |                     |
| 1938                                                     | 1                                                                                                                   |                                 |                     |
| 2934                                                     | 1                                                                                                                   |                                 |                     |
| 5315                                                     | 0                                                                                                                   |                                 |                     |
| 301                                                      | 1                                                                                                                   |                                 |                     |
| 79026                                                    | 0                                                                                                                   |                                 |                     |
| 2023                                                     | 1                                                                                                                   |                                 |                     |
| 2665                                                     | 1                                                                                                                   |                                 |                     |
| 302                                                      | 1                                                                                                                   |                                 |                     |
| 3312                                                     | 0                                                                                                                   |                                 |                     |
| 7534                                                     | 0                                                                                                                   |                                 |                     |
| 10487                                                    | 1                                                                                                                   |                                 |                     |
| 7414                                                     | 0                                                                                                                   |                                 |                     |
| 4001                                                     | 0                                                                                                                   |                                 |                     |
| 7167                                                     | 0                                                                                                                   |                                 |                     |
| 3939                                                     | 0                                                                                                                   |                                 |                     |
| 3320                                                     | 0                                                                                                                   |                                 |                     |
| 2923                                                     | 0                                                                                                                   |                                 |                     |
| 4000                                                     | 0                                                                                                                   |                                 |                     |
| 309                                                      | 1                                                                                                                   |                                 |                     |
| 8349                                                     | 0                                                                                                                   |                                 |                     |
| 2597                                                     | 1                                                                                                                   |                                 |                     |
| 440689                                                   | 0                                                                                                                   |                                 |                     |
| 3326                                                     | 0                                                                                                                   |                                 |                     |
| 5223; 643576                                             | 0                                                                                                                   |                                 |                     |
| 3329                                                     | 0                                                                                                                   |                                 |                     |
| 847                                                      | 1                                                                                                                   |                                 |                     |
|                                                          |                                                                                                                     |                                 |                     |

|                                    |
|------------------------------------|
| 5034                               |
| 5052                               |
| 1213                               |
| 5660                               |
| 7415                               |
| 1992                               |
| 7529                               |
| 70                                 |
| 3945                               |
| 1915                               |
| 1072                               |
| 70; 554313; 8365; 8364; 121504; 83 |
| 7171                               |
| 5725                               |
| 5272                               |
| 4860                               |
| 226                                |
| 4048                               |
| 6772                               |
| 2194                               |
| 8351; 8355; 8357; 8358; 8350; 8353 |
| 4869                               |
| 526                                |
| 506                                |
| 11315                              |
| 7531                               |
| 5184                               |
| 822                                |
| 4125                               |
| 6647                               |
| 1890; 9997                         |
| 4360                               |
| 7430                               |
| 10130                              |
| 3009                               |
| 5836                               |
| 7360                               |
| 7532                               |
| 7453                               |
| 5688                               |
| 10072                              |
| 5230                               |
| 5682                               |
| 5687                               |
| 328                                |
| 7296                               |
| 11344                              |
| 203068                             |
| 498                                |
| 83706                              |
| 8407                               |

|                        |
|------------------------|
| 333932; 126961; 653604 |
| 5685                   |
| 2512                   |
| 5686                   |
| 3178                   |
| 5689                   |
| 3609                   |
| 3858                   |
| 204                    |
| 3006                   |
| 5777                   |
| 7184                   |
| 1937                   |
| 290                    |
| 4190                   |
| 808; 805; 801          |
| 3007                   |
| 29108                  |
| 6624                   |
| 10963                  |
| 6279                   |
| 5339                   |
| 3008                   |
| 397                    |
| 10376                  |
| 1808                   |
| 3308                   |
| 51056                  |
| 5284                   |
| 5721                   |
| 5341                   |
| 2936                   |
| 6280                   |
| 3122                   |
| 1642                   |
| 7846                   |
| 9446                   |
| 5696                   |
| 832                    |
| 5216                   |
| 3428                   |
| 7408                   |
| 7170                   |
| 4691                   |
| 10971                  |
| 3020; 440926; 3021     |
| 5720                   |
| 3148                   |
| 6282                   |
| 3098                   |
| 5684                   |

|       |
|-------|
| 6233  |
| 10097 |
| 7295  |
| 3689  |
| 5962  |
| 2058  |
| 4628  |
| 4069  |
| 3684  |
| 3184  |
| 10383 |
| 826   |
| 5698  |
| 10961 |
| 1622  |
| 3074  |
| 2547  |
| 929   |
| 4191  |
| 5226  |
| 3146  |
| 5479  |
| 230   |
| 2203  |
| 6888  |
| 1192  |
| 47    |
| 9520  |
| 4830  |
| 81567 |
| 10492 |
| 7175  |
| 23344 |
| 523   |
| 5683  |
| 7520  |
| 142   |
| 55748 |
| 2896  |
| 5908  |
| 56886 |
| 23603 |
| 7329  |
| 829   |
| 2746  |
| 3190  |
| 2664  |
| 5037  |
| 5269  |
| 10096 |
| 3126  |

0  
 1  
 0  
 0  
 0  
 1  
 0  
 0  
 0  
 0  
 0  
 1  
 1  
 1  
 0  
 0  
 0  
 0  
 0  
 0  
 1  
 1  
 0  
 0  
 1  
 0  
 0  
 0  
 0  
 0  
 1  
 0  
 0  
 0  
 0  
 0  
 1  
 0  
 1  
 0  
 0  
 0  
 1  
 0  
 0  
 0  
 0  
 0





|              |
|--------------|
| 7112         |
| 6634         |
| 760          |
| 1981         |
| 10575        |
| 5271         |
| 5510         |
| 1075         |
| 3958         |
| 5878         |
| 2950         |
| 22919        |
| 9559         |
| 8775         |
| 51411        |
| 23020        |
| 5245         |
| 11335; 90416 |
| 3849         |
| 1973         |
| 56005        |
| 10525        |
| 6628         |
| 6189         |
| 3105         |
| 10327        |
| 7178         |
| 8662         |
| 3848         |
| 8338         |
| 4052         |
| 9126         |
| 7155         |
| 23406        |
| 3482         |
| 5931         |
| 2805         |
| 7873         |
| 9967         |
| 3690         |
| 6500         |
| 55700        |
| 4013         |
| 567          |
| 143244       |
| 5868         |
| 5478         |
| 3916         |
| 10923        |
| 1457         |
| 823          |

0  
0  
0  
0  
1  
0  
0  
1  
0  
0  
1  
0  
0  
0  
0  
0  
0  
0  
0  
1  
0  
1  
0  
0  
0  
0  
0  
1  
0  
0  
0  
0  
0  
1  
0  
0  
1  
0  
0  
0  
0  
0  
0  
1  
0  
0  
0  
0  
0  
1  
0  
0  
0  
0  
1  
0  
0  
0  
0  
1  
1

|        |
|--------|
|        |
| 8243   |
| 2026   |
| 51571  |
| 3956   |
| 6601   |
| 27101  |
| 214    |
| 3507   |
| 83442  |
| 10539  |
| 10576  |
| 6285   |
| 51292  |
| 3149   |
| 976    |
| 51631  |
| 2027   |
| 2885   |
| 4666   |
| 5273   |
| 2288   |
| 1520   |
| 22820  |
| 5589   |
| 516    |
| 4172   |
| 1660   |
| 5781   |
| 389898 |
| 1738   |
| 2876   |
| 2517   |
| 831    |
| 8635   |
| 3608   |
| 728689 |
| 8661   |
| 10989  |
| 5524   |
| 327    |
| 2317   |
| 3151   |
| 9782   |
| 4043   |
| 1991   |
| 5516   |
| 4076   |
| 10574  |
| 64167  |
| 8411   |

0  
 1  
 1  
 0  
 0  
 1  
 1  
 0  
 0  
 1  
 1  
 0  
 1  
 0  
 1  
 1  
 0  
 0  
 1  
 0  
 1  
 0  
 1  
 0  
 1  
 0  
 0  
 0  
 1  
 1  
 1  
 0  
 0  
 0  
 1  
 1  
 0  
 0  
 0  
 1  
 0  
 0  
 1  
 0  
 1  
 0  
 1

|        |
|--------|
| 9208   |
| 163    |
| 440686 |
| 4678   |
| 10521  |
| 6917   |
| 10437  |
| 2760   |
| 7536   |
| 9793   |
| 821    |
| 6125   |
| 1778   |
| 6451   |
| 10095  |
| 6275   |
| 427    |
| 126133 |
| 11021  |
| 4175   |
| 830    |
| 10549  |
| 6202   |
| 11345  |
| 7317   |
| 51816  |
| 8836   |
| 2040   |
| 6426   |
| 8761   |
| 5265   |
| 989    |
| 5204   |
| 92241  |
| 4738   |
| 5886   |
| 6139   |
| 6897   |
| 11054  |
| 51752  |
| 3118   |
| 2962   |
| 7257   |
| 8815   |
| 310    |
| 3295   |
| 4735   |
| 3150   |
| 6251   |
| 10189  |
| 8721   |

0  
 1  
 0  
 0  
 1  
 0  
 0  
 1  
 0  
 0  
 1  
 0  
 0  
 0  
 0  
 0  
 0  
 1  
 0  
 0  
 0  
 0  
 0  
 0  
 0  
 1  
 0  
 0  
 0  
 0  
 0  
 0  
 0  
 0  
 1  
 0  
 0  
 0  
 0  
 0  
 0  
 0  
 0  
 1  
 0  
 1  
 0  
 0  
 0  
 1  
 0  
 0  
 1  
 1























|                  |
|------------------|
| 23033            |
| 4671             |
| 84955            |
| 10890            |
| 3735             |
| 23085            |
| 5336             |
| 5573             |
| 4482             |
| 1777             |
| 2620             |
| 3182             |
| 5203             |
| 51155            |
| 522              |
| 10432; 100526737 |
| 345              |
| 145165           |
| 6234             |
| 9444             |
| 93100            |
| 2879             |
| 23078            |
| 6646             |
| 1069             |
| 1191             |
| 8544             |
| 63929            |
| 79366            |
| 5303             |
| 10043            |
|                  |
| 3145             |
| 3845             |
| 1739             |
| 1522             |
| 10592            |
| 4267             |
| 6728             |
|                  |
| 1810             |
| 5903             |
| 7706             |
| 54939            |
| 11314            |
| 55660            |
| 10980            |
| 10254            |
| 4301             |
| 2617             |
| 8829             |

0  
 0  
 0  
 0  
 0  
 0  
 0  
 0  
 0  
 0  
 0  
 0  
 0  
 0  
 0  
 0  
 0  
 1  
 0  
 0  
 0  
 0  
 0  
 1  
 0  
 0  
 0  
 0  
 0  
 0  
 0  
 0  
 0  
 0  
 0  
 1  
 0  
 0  
 0  
 0  
 0  
 0  
 1  
 0  
 0  
 1  
 0

|        |
|--------|
| 414061 |
| 3798   |
| 3612   |
| 4501   |
| 5437   |
| 374454 |
| 7979   |
| 30844  |
| 58472  |
| 3857   |
| 83592  |
| 84991  |
| 2195   |
| 5700   |
| 118611 |
| 4507   |
| 51143  |
| 3029   |
| 23     |
| 87769  |
| 51206  |
| 9590   |
| 10075  |
|        |
| 4134   |
| 645683 |
| 125950 |
| 8895   |
|        |
| 7264   |
| 5965   |
| 1410   |
| 4925   |
| 10540  |
| 27161  |
| 8894   |
| 5306   |
| 11052  |
| 51593  |
| 9861   |
| 5250   |
| 79165  |
| 10801  |
| 669    |
| 9696   |
| 175    |
| 2339   |
| 3054   |
| 6829   |
| 58477  |
| 56301  |

1  
 0  
 0  
 0  
 0  
 0  
 0  
 1  
 0  
 0  
 1  
 0  
 1  
 0  
 0  
 0  
 0  
 0  
 1  
 1  
 1  
 0  
  
 0  
 0  
 0  
 1  
  
 0  
 0  
 0  
 1  
 0  
 1  
 0  
 0  
 0  
 0  
 0  
 0  
 0  
 0  
 0  
 0  
 0  
 1  
 0  
 1  
 1  
 0  
 0  
 0



|                  |
|------------------|
| 115361           |
| 51237            |
| 283417           |
| 8603             |
| 23042; 102724985 |
| 1486             |
| 6141             |
| 10666            |
| 29082            |
| 3159             |
| 3431             |
| 54832            |
| 54414            |
| 9482             |
| 8548             |
| 84687            |
| 6133             |
| 3796             |
| 79002            |
| 9320             |
| 1047             |
| 1445             |
| 25909            |
| 5201             |
| 23028            |
| 978              |
| 1153             |
| 10061            |
| 4905             |
| 9531             |
| 4033             |
| 51560            |
| 969              |
| 10092            |
| 3646             |
| 9818             |
| 132              |
| 10542            |
| 81609            |
| 5092             |
| 54453            |
| 60491            |
| 51386            |
| 10476            |
| 64802            |
| 10855            |
| 1952             |
| 10131            |
| 6249             |
| 2260             |







|                       |
|-----------------------|
| 152137                |
| 5706                  |
| 103                   |
| 23517                 |
| 51747                 |
| 55844                 |
| 22978                 |
| 79577                 |
| 9584                  |
| 962                   |
| 3092                  |
| 10434                 |
| 4660                  |
| 6748                  |
| 51071                 |
| 81611                 |
| 26999                 |
| 6708                  |
| 5718                  |
| 2219                  |
| 2182                  |
| 7791                  |
| 6717                  |
| 411                   |
| 55727                 |
| 55737                 |
| 84154                 |
| 9146                  |
| 84898                 |
| 55665                 |
| 292                   |
| 5130                  |
| 5604                  |
| 4065; 100526664; 9936 |
| 5198                  |
| 55651                 |
| 55577                 |
| 10653                 |
| 4542                  |
| 8666                  |
| 164                   |
| 4116                  |
| 2814                  |
| 9368                  |
| 57103                 |
| 3416                  |
| 23451                 |
| 961                   |
| 8301                  |
| 9647                  |
| 3032                  |

1  
0  
1  
0  
0  
0  
0  
0  
0  
0  
1  
0  
0  
0  
1  
1  
1  
0  
0  
1  
1  
0  
0  
0  
1  
0  
0  
0  
0  
0  
0  
0  
1  
0  
0  
0  
0  
1  
1  
0  
1  
0  
0  
0  
0  
0  
0  
0  
0  
0  
1

|               |
|---------------|
| <b>6921</b>   |
| <b>6193</b>   |
| <b>573</b>    |
| <b>11165</b>  |
| <b>6637</b>   |
| <b>83641</b>  |
| <b>5552</b>   |
| <b>125061</b> |
| <b>9525</b>   |
| <b>5019</b>   |
| <b>55573</b>  |
| <b>5331</b>   |
| <b>509</b>    |
| <b>91526</b>  |
| <b>79031</b>  |
| <b>4204</b>   |
| <b>23163</b>  |
| <b>5434</b>   |
| <b>9129</b>   |
| <b>150684</b> |
| <b>1785</b>   |
| <b>54927</b>  |
| <b>2801</b>   |
| <b>26058</b>  |

0  
0  
0  
0  
0  
0  
0  
0  
0  
0  
0  
0  
0  
0  
0  
0  
0  
0  
1  
0  
0  
0  
1  
0  
0  
0  
0  
1  
0  
1  
0



|                  |                                                                                                                                                              |                                                                                             |                                                                                                      |
|------------------|--------------------------------------------------------------------------------------------------------------------------------------------------------------|---------------------------------------------------------------------------------------------|------------------------------------------------------------------------------------------------------|
| 3178             | cell communication;metabolic process;regulation of biological process;response to stimulus;transport                                                         | cytoplasm;membrane;nucleus;spliceosomal complex                                             | DNA binding;protein binding;RNA binding                                                              |
| 3689             | cell organization and biogenesis;metabolic process;regulation of biological process;response to stimulus;transport                                           | cytoplasm;cytosol;extracellular;lumen;organelle lumen;proteasome                            | catalytic activity;protein binding                                                                   |
| 3609             | defense response;metabolic process;regulation of biological process;response to stimulus                                                                     | cytoplasm;extracellular;membrane;mitochondrion;nucleus                                      | DNA binding;protein binding;RNA binding                                                              |
| 3858             | cell death;cell differentiation;metabolic process                                                                                                            | cytoplasm;cytoskeleton;cytosol;membrane;nucleus                                             | structural molecule activity                                                                         |
| 204              | metabolic process                                                                                                                                            | membrane;mitochondrion                                                                      | catalytic activity;nucleotide binding                                                                |
| 3006             | cell organization and biogenesis;metabolic process;regulation of biological process                                                                          | chromosome;nucleus                                                                          | DNA binding;protein binding;RNA binding                                                              |
| 5777             | cell death;cell differentiation;cell proliferation;cellular component movement;defense response;metabolic process;regulation of biological process           | cytoplasm;cytosol;extracellular;membrane;nucleus;organelle lumen                            | catalytic activity;protein binding;receptor activity;signal transducer activity                      |
| 7184             | cell organization and biogenesis;metabolic process;regulation of biological process;response to stimulus;transport                                           | cytosol;endoplasmic reticulum;extracellular;membrane;nucleus;organelle lumen                | metal ion binding;nucleotide binding;protein binding;RNA binding                                     |
| 1937             | metabolic process;response to stimulus                                                                                                                       | cytoplasm;cytosol;endoplasmic reticulum;membrane;nucleus                                    | catalytic activity;protein binding;RNA binding                                                       |
| 290              | cell communication;cell differentiation;development;metabolic process;regulation of biological process;response to stimulus;transport                        | membrane;nucleus                                                                            | catalytic activity;metal ion binding;receptor activity                                               |
| 4190             | metabolic process                                                                                                                                            | cytoplasm;cytosol;mitochondrion                                                             | catalytic activity;nucleotide binding;protein binding                                                |
| 808; 805; 801    | metabolic process;regulation of biological process;response to stimulus;transport                                                                            | cytoplasm;cytoskeleton;cytosol;extracellular;membrane                                       | catalytic activity;enzyme regulator activity;metal ion binding;protein binding;transporter activity  |
| 3007             | cell organization and biogenesis;metabolic process;regulation of biological process                                                                          | chromosome;nucleus                                                                          | DNA binding;RNA binding                                                                              |
| 29108            | cell death;cell organization and biogenesis;defense response;metabolic process;regulation of biological process;response to stimulus                         | cytoplasm;cytosol;endoplasmic reticulum;extracellular;mitochondrion;nucleus;organelle lumen | catalytic activity;enzyme regulator activity;protein binding                                         |
| 6624             | cell organization and biogenesis;cell proliferation;cellular component movement;regulation of biological process                                             | cytoplasm;cytoskeleton;cytosol                                                              | protein binding;RNA binding                                                                          |
| 10963            | response to stimulus                                                                                                                                         | cytoplasm;cytosol;Golgi nucleus                                                             | protein binding;RNA binding                                                                          |
| 6279             | cell death;cellular component movement;defense response;metabolic process;regulation of biological process;response to stimulus;transport                    | cytoplasm;cytoskeleton;cytosol;extracellular;membrane;nucleus;organelle lumen               | metal ion binding;protein binding                                                                    |
| 5339             | cell organization and biogenesis                                                                                                                             | cytoplasm;cytoskeleton;cytosol;membrane                                                     | protein binding;RNA binding;structural molecule activity                                             |
| 3008             | cell organization and biogenesis;metabolic process;regulation of biological process                                                                          | chromosome;nucleus                                                                          | DNA binding;metal ion binding;nucleotide binding;protein binding;RNA binding                         |
| 397              | cellular component movement;development;regulation of biological process;response to stimulus                                                                | cytoplasm;cytoskeleton;cytosol;membrane                                                     | catalytic activity;enzyme regulator activity;protein binding                                         |
| 10376            | cell division;cell organization and biogenesis;response to stimulus;transport                                                                                | cytoplasm;cytoskeleton;membrane                                                             | catalytic activity;nucleotide binding;protein binding;RNA binding;structural molecule activity       |
| 1808             | cell differentiation;cell organization and biogenesis;cellular component movement;development;metabolic process;regulation of biological process             | cytoplasm;cytoskeleton;cytosol;membrane                                                     | catalytic activity;protein binding                                                                   |
| 3308             | cell organization and biogenesis;response to stimulus;transport                                                                                              | cytoplasm;cytosol                                                                           | nucleotide binding;protein binding                                                                   |
| 51056            | metabolic process                                                                                                                                            | cytoplasm;cytosol;mitochondrion;nucleus                                                     | catalytic activity;metal ion binding                                                                 |
| 5284             | cell organization and biogenesis;regulation of biological process;response to stimulus;transport                                                             | extracellular;membrane                                                                      | receptor activity;signal transducer activity                                                         |
| 5721             | metabolic process;regulation of biological process;response to stimulus;transport                                                                            | cytoplasm;cytosol;membrane;proteasome                                                       | enzyme regulator activity;protein binding                                                            |
| 5341             | cell differentiation;cell organization and biogenesis;metabolic process;regulation of biological process;response to stimulus;transport                      | cytoplasm;cytosol;extracellular;membrane                                                    | protein binding                                                                                      |
| 2936             | cellular homeostasis;metabolic process;regulation of biological process;response to stimulus                                                                 | cytoplasm;cytosol;mitochondrion;organelle lumen                                             | antioxidant activity;catalytic activity;nucleotide binding                                           |
| 6280             | cell communication;cell death;cellular component movement;defense response;metabolic process;regulation of biological process;response to stimulus           | cytoplasm;cytoskeleton;cytosol;extracellular;membrane;nucleus;organelle lumen               | antioxidant activity;catalytic activity;metal ion binding;protein binding;signal transducer activity |
| 3122             | cell organization and biogenesis;regulation of biological process;response to stimulus                                                                       | cell surface;endoplasmic reticulum;endosome;Golgi;membrane;vacuole                          | protein binding;receptor activity;signal transducer activity                                         |
| 1642             | cell organization and biogenesis;metabolic process;regulation of biological process;response to stimulus                                                     | cytoplasm;nucleus                                                                           | DNA binding;protein binding                                                                          |
| 7844             | cell division;cell organization and biogenesis;regulation of biological process;transport                                                                    | cytoplasm;cytoskeleton;cytosol;endosome;membrane;nucleus                                    | catalytic activity;nucleotide binding;protein binding;structural molecule activity                   |
| 9446             | cellular homeostasis;metabolic process;regulation of biological process;response to stimulus                                                                 | cytoplasm;cytosol                                                                           | antioxidant activity;catalytic activity;protein binding                                              |
| 5696             | cell differentiation;metabolic process;regulation of biological process;response to stimulus;transport                                                       | cytoplasm;cytosol;nucleus;proteasome                                                        | catalytic activity;protein binding                                                                   |
| 832              | cell organization and biogenesis;cellular component movement;coagulation;regulation of biological process;transport                                          | cytoplasm;cytoskeleton;cytosol                                                              | enzyme regulator activity;nucleotide binding;protein binding;RNA binding                             |
| 5216             | cell organization and biogenesis;regulation of biological process;response to stimulus                                                                       | cytoplasm;cytoskeleton;cytosol;membrane;nucleus                                             | DNA binding;protein binding;RNA binding                                                              |
| 3428             | cell communication;cell death;cell differentiation;cell proliferation;defense response;metabolic process;regulation of biological process                    | cytoplasm;cytosol;membrane;nucleus                                                          | protein binding                                                                                      |
| 7408             | cell organization and biogenesis;cellular component movement;regulation of biological process                                                                | cytoplasm;cytoskeleton;cytosol;membrane                                                     | protein binding;structural molecule activity                                                         |
| 7170             | cell organization and biogenesis;cellular component movement                                                                                                 | cytoplasm;cytoskeleton;cytosol                                                              | DNA binding;protein binding;RNA binding                                                              |
| 4691             | regulation of biological process;response to stimulus                                                                                                        | cytoplasm;membrane;nucleus                                                                  | protein binding                                                                                      |
| 10971            | cell organization and biogenesis;regulation of biological process;response to stimulus;transport                                                             | cytoplasm;cytosol;membrane;mitochondrion                                                    | DNA binding;protein binding                                                                          |
| 020; 440926; 302 | cell differentiation;cell organization and biogenesis;cell proliferation;coagulation;metabolic process;regulation of biological process;response to stimulus | chromosome;extracellular;nucleus                                                            | enzyme regulator activity;protein binding                                                            |
| 5720             | metabolic process;regulation of biological process;response to stimulus;transport                                                                            | cytoplasm;cytosol;proteasome                                                                | DNA binding;protein binding;RNA binding                                                              |
| 3148             | cell organization and biogenesis;cellular component movement;defense response;metabolic process;regulation of biological process                             | chromosome;cytoplasm;extracellular;nucleus                                                  | metal ion binding;protein binding                                                                    |
| 6282             | regulation of biological process;response to stimulus;transport                                                                                              | cytoplasm;extracellular;nucleus;organelle lumen                                             | catalytic activity;nucleotide binding;protein binding                                                |
| 3098             | cellular homeostasis;metabolic process;regulation of biological process                                                                                      | cytosol;membrane;mitochondrion                                                              | catalytic activity;nucleotide binding;protein binding                                                |
| 5684             | metabolic process;regulation of biological process;response to stimulus;transport                                                                            | cytoplasm;cytosol;nucleus;proteasome                                                        | metal ion binding;protein binding;RNA binding;structural molecule activity                           |
| 6203             | cell communication;cell organization and biogenesis;cellular homeostasis;defense response;metabolic process;regulation of biological process                 | cytoplasm;cytosol;membrane;nucleus;ribosome                                                 | nucleotide binding;protein binding;structural molecule activity                                      |
| 10097            | cell division;cell organization and biogenesis;cellular component movement;regulation of biological process;response to stimulus;transport                   | cytoplasm;cytoskeleton;cytosol;extracellular;membrane;organelle lumen                       | antioxidant activity;catalytic activity;protein binding;RNA binding                                  |
| 7295             | cell communication;cell proliferation;cellular component movement;cellular homeostasis;metabolic process;regulation of biological process                    | cytoplasm;cytosol;extracellular;mitochondrion;nucleus                                       | metal ion binding;protein binding;receptor activity;signal transducer activity                       |
| 3689             | cell communication;cell death;cell differentiation;cell organization and biogenesis;cellular component movement;defense response;metabolic process           | cell surface;membrane                                                                       | protein binding;RNA binding                                                                          |
| 5962             | cell organization and biogenesis;regulation of biological process;response to stimulus                                                                       | cytoplasm;cytoskeleton;membrane                                                             | catalytic activity;metal ion binding;nucleotide binding;protein binding;RNA binding                  |
| 2058             | cell organization and biogenesis;metabolic process;regulation of biological process;response to stimulus                                                     | cytoplasm;cytosol;membrane                                                                  | catalytic activity;motor activity;nucleotide binding;protein binding;transporter activity            |
| 4628             | cell organization and biogenesis;cellular component movement;metabolic process;regulation of biological process;transport                                    | cytoplasm;cytosol;nucleus                                                                   | catalytic activity;protein binding                                                                   |
| 4069             | defense response;metabolic process;response to stimulus;transport                                                                                            | extracellular;organelle lumen                                                               | metal ion binding;protein binding                                                                    |
| 3684             | cell differentiation;cell organization and biogenesis;cellular component movement;regulation of biological process;response to stimulus                      | cell surface;membrane                                                                       | DNA binding;protein binding;RNA binding                                                              |
| 3184             | metabolic process;regulation of biological process;response to stimulus                                                                                      | cytoplasm;cytosol;nucleus                                                                   | catalytic activity;nucleotide binding;protein binding;RNA binding;structural molecule activity       |
| 10383            | cell organization and biogenesis;cellular component movement;defense response;regulation of biological process;response to stimulus                          | cytoplasm;cytoskeleton;cytosol;extracellular;nucleus;organelle lumen                        | catalytic activity;metal ion binding;protein binding                                                 |
| 826              | cell death;cell organization and biogenesis;metabolic process;regulation of biological process                                                               | cytoplasm;cytosol;membrane                                                                  | catalytic activity;protein binding                                                                   |

|               |                                                                                                                                                    |                                                                                             |                                                                                                  |
|---------------|----------------------------------------------------------------------------------------------------------------------------------------------------|---------------------------------------------------------------------------------------------|--------------------------------------------------------------------------------------------------|
| 9555          | cell organization and biogenesis;regulation of biological process                                                                                  | chromosome;nucleus                                                                          | DNA binding;enzyme regulator activity;protein binding                                            |
| 140885        | cellular component movement;transport                                                                                                              | membrane                                                                                    | protein binding                                                                                  |
| 26986         | metabolic process;regulation of biological process                                                                                                 | cytoplasm;cytosol;membrane;nucleus;spliceosomal complex                                     | protein binding;RNA binding;translation regulator activity                                       |
| 5898          | cell division;cell organization and biogenesis;regulation of biological process;response to stimulus;transport                                     | cell surface;membrane                                                                       | catalytic activity;nucleotide binding;protein binding                                            |
| 54504         | metabolic process                                                                                                                                  |                                                                                             | catalytic activity                                                                               |
| 6036          | defense response;metabolic process;response to stimulus;transport                                                                                  | extracellular;organelle lumen;vacuole                                                       | catalytic activity                                                                               |
| 5553          | defense response;regulation of biological process;response to stimulus;transport                                                                   | extracellular                                                                               |                                                                                                  |
| 6421          | cell organization and biogenesis;defense response;metabolic process;regulation of biological process;response to stimulus                          | chromosome;cytoplasm;nucleus                                                                | DNA binding;protein binding;RNA binding                                                          |
| 7533          | cell organization and biogenesis;metabolic process;regulation of biological process;response to stimulus;transport                                 | cytoplasm;cytosol;membrane;mitochondrion                                                    | catalytic activity;protein binding                                                               |
| 7037          | cell differentiation;cell organization and biogenesis;cellular homeostasis;metabolic process;regulation of biological process;response to stimulus | cell surface;endosome;extracellular;membrane                                                | protein binding;receptor activity;RNA binding;transporter activity                               |
| 11198         | cell organization and biogenesis;metabolic process;regulation of biological process;response to stimulus                                           | chromosome;nucleus                                                                          | protein binding;RNA binding                                                                      |
| 708           | cell death;cell organization and biogenesis;defense response;metabolic process;regulation of biological process;response to stimulus               | cell surface;cytoplasm;cytosol;extracellular;membrane;mitochondrion;nucleus;organelle lumen | protein binding;RNA binding                                                                      |
| 396           | cellular component movement;regulation of biological process;response to stimulus                                                                  | cytoplasm;cytoskeleton;cytosol                                                              | enzyme regulator activity;protein binding                                                        |
| 1511          | cell organization and biogenesis;defense response;metabolic process;regulation of biological process;response to stimulus;transport                | cell surface;extracellular;membrane;nucleus;organelle lumen                                 | catalytic activity;protein binding                                                               |
| 51031         |                                                                                                                                                    | mitochondrion                                                                               | protein binding                                                                                  |
| 22827         | cell death;cellular homeostasis;metabolic process;regulation of biological process                                                                 | nucleus                                                                                     | catalytic activity;DNA binding;protein binding;RNA binding                                       |
| 4926          | cell differentiation;cell division;cell organization and biogenesis;metabolic process;regulation of biological process                             | chromosome;cytoplasm;cytoskeleton;cytosol;membrane;nucleus                                  | protein binding;structural molecule activity                                                     |
| 10627         | regulation of biological process;response to stimulus                                                                                              | cytosol                                                                                     | metal ion binding;protein binding                                                                |
| 4831, 654364  | cell organization and biogenesis;cellular homeostasis;metabolic process;regulation of biological process;response to stimulus;transport            | cytoplasm;cytosol;extracellular;membrane;nucleus;organelle lumen                            | catalytic activity;DNA binding;metal ion binding;nucleotide binding;protein binding              |
| 103910, 10627 | regulation of biological process;response to stimulus                                                                                              | cytosol                                                                                     | metal ion binding;protein binding                                                                |
| 7203          | cell organization and biogenesis;metabolic process;regulation of biological process;transport                                                      | cytoplasm;cytoskeleton;cytosol;membrane                                                     | nucleotide binding;protein binding;RNA binding                                                   |
| 7001          | cell communication;cellular homeostasis;metabolic process;regulation of biological process;response to stimulus                                    | cytoplasm;cytosol;membrane                                                                  | antioxidant activity;catalytic activity;protein binding                                          |
| 5887          | cell organization and biogenesis;metabolic process;regulation of biological process;response to stimulus                                           | cytoplasm;cytosol;nucleus;proteasome                                                        | DNA binding;protein binding                                                                      |
| 11164         | cell organization and biogenesis;metabolic process                                                                                                 | cytosol;nucleus                                                                             | catalytic activity;metal ion binding;protein binding;RNA binding                                 |
| 6181          | cell organization and biogenesis;metabolic process;transport                                                                                       | cytosol;membrane;ribosome                                                                   | protein binding;structural molecule activity                                                     |
| 2799          | metabolic process;transport                                                                                                                        | extracellular;organelle lumen;vacuole                                                       | catalytic activity;metal ion binding;protein binding                                             |
| 10493         | metabolic process;regulation of biological process;transport                                                                                       | cytoplasm;extracellular;membrane;mitochondrion;organelle lumen                              | catalytic activity;metal ion binding                                                             |
| 79180         |                                                                                                                                                    | membrane                                                                                    | metal ion binding;protein binding                                                                |
| 4082          | cell organization and biogenesis;regulation of biological process                                                                                  | cytoplasm;cytoskeleton;membrane;nucleus                                                     | protein binding                                                                                  |
| 8125          | cell organization and biogenesis;metabolic process;regulation of biological process;response to stimulus;transport                                 | cytoplasm;endoplasmic reticulum;nucleus                                                     | protein binding;RNA binding                                                                      |
| 3035          | cell organization and biogenesis;metabolic process                                                                                                 | cytoplasm;cytosol;mitochondrion                                                             | catalytic activity;nucleotide binding;protein binding                                            |
| 4637          | cellular component movement                                                                                                                        | cytosol;membrane                                                                            | catalytic activity;metal ion binding;motor activity;protein binding;structural molecule activity |
| 9255          | cell communication;cell death;cellular component movement;defense response;metabolic process;regulation of biological process;response to stimulus | cell surface;cytoplasm;cytosol;endoplasmic reticulum;extracellular;Golgi;membrane;nucleus   | protein binding;RNA binding                                                                      |
| 25796         | metabolic process                                                                                                                                  | cytoplasm;cytosol                                                                           | catalytic activity;protein binding                                                               |
| 3183          | cell differentiation;cell organization and biogenesis;metabolic process;regulation of biological process                                           | cytoskeleton;cytosol;extracellular;membrane;nucleus;spliceosomal complex                    | DNA binding;protein binding;RNA binding                                                          |
| 23071         | cellular homeostasis;metabolic process;regulation of biological process;response to stimulus;transport                                             | cell surface;endoplasmic reticulum;extracellular;membrane;organelle lumen                   | catalytic activity;metal ion binding;protein binding                                             |
| 162           | regulation of biological process;transport                                                                                                         | cytosol;Golgi;membrane                                                                      | protein binding;transporter activity                                                             |
| 5093          | metabolic process;regulation of biological process                                                                                                 | cytoplasm;cytosol;membrane;nucleus                                                          | DNA binding;protein binding;RNA binding                                                          |
| 51466         | cell organization and biogenesis;cellular component movement;regulation of biological process;response to stimulus                                 | cytoplasm;cytoskeleton;cytosol;membrane                                                     | protein binding                                                                                  |
| 100           | cell differentiation;metabolic process;regulation of biological process;response to stimulus;transport                                             | cell surface;cytoplasm;cytosol;membrane;organelle lumen;vacuole                             | catalytic activity;metal ion binding;protein binding                                             |
| 11316         | transport                                                                                                                                          | cytoplasm;cytosol;Golgi;membrane                                                            | protein binding;structural molecule activity                                                     |
|               | regulation of biological process;response to stimulus                                                                                              | endoplasmic reticulum                                                                       |                                                                                                  |
| 1975          | cell organization and biogenesis;metabolic process;regulation of biological process                                                                | cytosol                                                                                     | catalytic activity;protein binding;RNA binding                                                   |
| 3181          | metabolic process;regulation of biological process;response to stimulus;transport                                                                  | cytoplasm;extracellular;membrane;nucleus;spliceosomal complex                               | DNA binding;protein binding;RNA binding                                                          |
| 10007         | metabolic process                                                                                                                                  | cytoplasm;cytosol                                                                           | catalytic activity;protein binding                                                               |
| 3674          | cell organization and biogenesis;regulation of biological process;response to stimulus;transport                                                   | cell surface;membrane                                                                       | metal ion binding;protein binding                                                                |
| 2271          | metabolic process                                                                                                                                  | cytoplasm;mitochondrion;organelle lumen                                                     | catalytic activity;protein binding                                                               |
|               |                                                                                                                                                    |                                                                                             |                                                                                                  |
| 55920         | cell division;cell organization and biogenesis;regulation of biological process;response to stimulus                                               | chromosome;cytoplasm;cytoskeleton;cytosol;membrane;nucleus                                  | protein binding;RNA binding                                                                      |
| 4670          | metabolic process;regulation of biological process;response to stimulus                                                                            | membrane;nucleus;spliceosomal complex                                                       | protein binding;RNA binding                                                                      |
| 6709          | cell organization and biogenesis;cellular component movement;metabolic process;regulation of biological process;response to stimulus               | cytoplasm;cytoskeleton;cytosol;extracellular;membrane;organelle lumen                       | metal ion binding;protein binding;structural molecule activity                                   |
| 6711          | cell organization and biogenesis;cellular component movement;metabolic process;regulation of biological process;response to stimulus               | cytoplasm;cytoskeleton;cytosol;membrane;nucleus                                             | protein binding;RNA binding;structural molecule activity                                         |
| 2745          | cellular homeostasis;metabolic process;regulation of biological process;transport                                                                  | cytoplasm;cytosol;mitochondrion;nucleus                                                     | catalytic activity;protein binding                                                               |
| 10606         | metabolic process                                                                                                                                  | cytoplasm;cytosol;membrane                                                                  | catalytic activity;nucleotide binding;protein binding                                            |
| 9131          | cell death;cell differentiation;cell organization and biogenesis;cellular homeostasis;metabolic process;regulation of biological process           | cytoplasm;cytosol;membrane;mitochondrion;nucleus                                            | catalytic activity;DNA binding;nucleotide binding;protein binding                                |
| 7416          | cell communication;cell death;cell differentiation;defense response;metabolic process;regulation of biological process;response to stimulus        | membrane;mitochondrion;nucleus                                                              | protein binding;transporter activity                                                             |
| 3185          | metabolic process;regulation of biological process;response to stimulus                                                                            | cytosol;membrane;nucleus;spliceosomal complex                                               | protein binding;RNA binding                                                                      |
| 5691          | regulation of biological process;response to stimulus;transport                                                                                    | cytoplasm;cytosol;membrane;nucleus;proteasome                                               | catalytic activity;enzyme regulator activity;protein binding                                     |
| 27044         | cell differentiation;metabolic process;regulation of biological process                                                                            | cytoplasm;cytosol;membrane;mitochondrion;nucleus                                            | catalytic activity;protein binding;RNA binding                                                   |
| 308           | coagulation;regulation of biological process;response to stimulus;transport                                                                        | cytoplasm;cytosol;extracellular;membrane                                                    | enzyme regulator activity;metal ion binding;protein binding                                      |
| 6922          | metabolic process;regulation of biological process;response to stimulus;transport                                                                  | cytoplasm;cytosol;nucleus;proteasome                                                        | catalytic activity;enzyme regulator activity;protein binding                                     |
| 2171          | metabolic process;transport                                                                                                                        | cytoplasm;cytosol;extracellular;membrane;organelle lumen                                    | protein binding;transporter activity                                                             |
| 84823         |                                                                                                                                                    | membrane;nucleus                                                                            | catalytic activity;motor activity;protein binding;structural molecule activity                   |
| 10236         | metabolic process;regulation of biological process                                                                                                 | cytoplasm;endoplasmic reticulum;nucleus;spliceosomal complex                                | protein binding;RNA binding                                                                      |
| 2184          | metabolic process                                                                                                                                  | cytosol                                                                                     | catalytic activity;metal ion binding;protein binding                                             |
| 6950          | cell organization and biogenesis;metabolic process;regulation of biological process;response to stimulus;transport                                 | cytoplasm;cytoskeleton;cytosol;Golgi                                                        | nucleotide binding;protein binding;RNA binding                                                   |
| 5036          | cell proliferation;metabolic process;regulation of biological process;transport                                                                    | cytoplasm;extracellular;membrane;nucleus;organelle lumen                                    | DNA binding;protein binding;RNA binding                                                          |
| 6175          | cell organization and biogenesis;metabolic process;regulation of biological process;response to stimulus;transport                                 | cytoplasm;cytosol;endoplasmic reticulum;membrane;nucleus;ribosome                           | protein binding;RNA binding;structural molecule activity                                         |
| 10935         | cell death;cell differentiation;cell organization and biogenesis;cellular homeostasis;metabolic process;regulation of biological process           | cytoplasm;cytosol;endosome;mitochondrion;organelle lumen                                    | antioxidant activity;catalytic activity;enzyme regulator activity;protein binding                |
| 8880          | metabolic process;regulation of biological process                                                                                                 | nucleus                                                                                     | DNA binding;protein binding;RNA binding                                                          |
| 1509          | metabolic process;transport                                                                                                                        | extracellular;membrane;organelle lumen;vacuole                                              | catalytic activity;protein binding                                                               |
| 6741          | metabolic process;transport                                                                                                                        | cytoplasm;nucleus                                                                           | protein binding;RNA binding                                                                      |
| 3251          | cell differentiation;cell organization and biogenesis;cell proliferation;metabolic process;regulation of biological process;response to stimulus   | cytoplasm;cytosol                                                                           | catalytic activity;metal ion binding;nucleotide binding;protein binding                          |
| 10577         | metabolic process;regulation of biological process;response to stimulus;transport                                                                  | endoplasmic reticulum;extracellular;organelle lumen;vacuole                                 | protein binding;transporter activity                                                             |
| 7332          | cell proliferation;metabolic process;regulation of biological process;response to stimulus                                                         | cytoplasm;cytosol;nucleus                                                                   | catalytic activity;enzyme regulator activity;nucleotide binding;protein binding;RNA binding      |
| 3304, 3303    | cell organization and biogenesis;metabolic process;regulation of biological process;response to stimulus;transport                                 | cytoplasm;cytoskeleton;cytosol;endoplasmic reticulum;extracellular;mitochondrion;nucleus    | catalytic activity;nucleotide binding;protein binding;receptor activity;RNA binding              |
| 5968          | cell organization and biogenesis;metabolic process;regulation of biological process                                                                | chromosome;cytoskeleton;cytosol;Golgi;membrane;nucleus                                      | enzyme regulator activity;protein binding                                                        |
| 7919          | cell organization and biogenesis;metabolic process;regulation of biological process;transport                                                      | cytoplasm;nucleus;spliceosomal complex                                                      | catalytic activity;nucleotide binding;protein binding;RNA binding                                |
| 9948          | cell differentiation;cell organization and biogenesis;cellular component movement;metabolic process;regulation of biological process               | cytoplasm;cytoskeleton;cytosol;extracellular                                                | protein binding                                                                                  |
| 6050          | metabolic process;regulation of biological process                                                                                                 | cytoplasm;cytosol                                                                           | enzyme regulator activity;protein binding                                                        |
| 3799          | cell differentiation;cell organization and biogenesis;cellular component movement;metabolic process;regulation of biological process               | cytoplasm;cytoskeleton;cytosol;membrane                                                     | catalytic activity;motor activity;nucleotide binding;protein binding                             |
| 9588          | cellular homeostasis;metabolic process;regulation of biological process;response to stimulus;transport                                             | cytoplasm;cytosol;extracellular;membrane;nucleus;organelle lumen;vacuole                    | antioxidant activity;catalytic activity;protein binding                                          |
| 3417          | metabolic process;regulation of biological process;response to stimulus;transport                                                                  | cytoplasm;cytosol;extracellular;mitochondrion;organelle lumen                               | catalytic activity;metal ion binding;nucleotide binding;protein binding                          |
| 5473          | cellular component movement;defense response;regulation of biological process;response to stimulus;transport                                       | extracellular;organelle lumen                                                               | protein binding;transporter activity                                                             |
| 79017         | cell organization and biogenesis;metabolic process                                                                                                 | cytosol                                                                                     | catalytic activity;protein binding                                                               |
| 23193         | metabolic process                                                                                                                                  | endoplasmic reticulum;Golgi;membrane;organelle lumen                                        | catalytic activity;RNA binding                                                                   |
| 2937          | metabolic process;response to stimulus                                                                                                             | cytosol                                                                                     | catalytic activity;metal ion binding;nucleotide binding;protein binding                          |
| 7555          | metabolic process;regulation of biological process                                                                                                 | cytoplasm;cytosol;endoplasmic reticulum;nucleus                                             | DNA binding;metal ion binding;protein binding;RNA binding                                        |
| 387           | cell differentiation;cell division;cell organization and biogenesis;cellular component movement;metabolic process;regulation of biological process | cytoplasm;cytoskeleton;cytosol;endosome;membrane                                            | catalytic activity;nucleotide binding;protein binding                                            |
| 3115          | regulation of biological process;response to stimulus                                                                                              | cell surface;endoplasmic reticulum;endosome;Golgi;membrane;vacuole                          |                                                                                                  |
| 25939         | cell organization and biogenesis;defense response;metabolic process;regulation of biological process;response to stimulus                          | membrane;nucleus                                                                            | catalytic activity;metal ion binding;protein binding                                             |
| 3068          | cell proliferation;metabolic process;regulation of biological process;response to stimulus                                                         | cytoplasm;extracellular;nucleus                                                             | DNA binding;nucleotide binding;protein binding;RNA binding                                       |
| 11151         | cell organization and biogenesis;cellular component movement;defense response;regulation of biological process;response to stimulus                | cytoplasm;cytoskeleton;cytosol;endosome;membrane;nucleus                                    | protein binding;RNA binding                                                                      |
| 55276         | metabolic process;transport                                                                                                                        | cytoplasm;cytosol;extracellular;organelle lumen                                             | catalytic activity;metal ion binding;protein binding                                             |
| 5691          | metabolic process;regulation of biological process;response to stimulus;transport                                                                  | cytoplasm;cytosol;nucleus;proteasome                                                        | catalytic activity;enzyme regulator activity;protein binding                                     |
| 4841          | defense response;metabolic process;regulation of biological process;response to stimulus                                                           | membrane;nucleus                                                                            | DNA binding;protein binding;RNA binding                                                          |
| 3959          | defense response;regulation of biological process;response to stimulus;transport                                                                   | extracellular;membrane;organelle lumen                                                      | protein binding;receptor activity                                                                |
| 2539          | metabolic process;regulation of biological process;response to stimulus                                                                            | cytoplasm;cytosol;membrane;nucleus                                                          | catalytic activity;nucleotide binding;protein binding                                            |
| 7112          | regulation of biological process                                                                                                                   | chromosome;nucleus                                                                          | DNA binding;protein binding                                                                      |
| 6634          | cell organization and biogenesis;metabolic process;transport                                                                                       | cytoplasm;cytosol;nucleus;spliceosomal complex                                              | protein binding;RNA binding                                                                      |
| 760           | cellular homeostasis;metabolic process;regulation of biological process;response to stimulus;transport                                             | cytoplasm;cytosol;membrane                                                                  | catalytic activity;metal ion binding;protein binding                                             |
| 1981          | cell organization and biogenesis;defense response;metabolic process;regulation of biological process;response to stimulus                          | cytoplasm;cytosol;membrane;nucleus                                                          | nucleotide binding;protein binding;RNA binding;structural molecule activity                      |

|              |                                                                                                                                                                  |                                                                                                    |                                                                                                      |
|--------------|------------------------------------------------------------------------------------------------------------------------------------------------------------------|----------------------------------------------------------------------------------------------------|------------------------------------------------------------------------------------------------------|
| 10575        | metabolic process;regulation of biological process;transport                                                                                                     | cytoplasm;cytoskeleton;cytosol                                                                     | nucleotide binding;protein binding;RNA binding                                                       |
| 5271         | regulation of biological process                                                                                                                                 | cytoplasm;cytosol                                                                                  | enzyme regulator activity;protein binding                                                            |
| 5510         | regulation of biological process                                                                                                                                 | chromosome;cytoplasm;nucleus                                                                       | enzyme regulator activity;protein binding                                                            |
| 1075         | cell death;cell organization and biogenesis;metabolic process;regulation of biological process;response to stimulus;transport                                    | endoplasmic reticulum;extracellular;Golgi;membrane;organelle lumen;vacuole                         | catalytic activity;enzyme regulator activity;protein binding                                         |
| 3958         | cell differentiation;cellular component movement;defense response;metabolic process;regulation of biological process;response to stimulus                        | cytoplasm;extracellular;membrane;nucleus;spliceosomal complex                                      | protein binding;RNA binding                                                                          |
| 5878         | regulation of biological process;response to stimulus;transport                                                                                                  | endosome;membrane                                                                                  | catalytic activity;nucleotide binding;protein binding                                                |
| 2950         | cell communication;cell proliferation;metabolic process;regulation of biological process;response to stimulus;transport                                          | cytoplasm;cytosol;extracellular;membrane;mitochondrion;nucleus;organelle lumen                     | antioxidant activity;catalytic activity;enzyme regulator activity;protein binding                    |
| 22919        | cell division;cell organization and biogenesis;cell proliferation;regulation of biological process                                                               | cytoplasm;cytoskeleton;cytosol;Golgi                                                               | protein binding;RNA binding                                                                          |
| 9559         | regulation of biological process;response to stimulus;transport                                                                                                  | cytoplasm;cytosol;endosome;membrane;vacuole                                                        | protein binding;transporter activity                                                                 |
| 8775         | cell communication;cell differentiation;cell organization and biogenesis;regulation of biological process;transport                                              | cytosol;membrane                                                                                   | protein binding                                                                                      |
| 51411        | cell organization and biogenesis;cellular component movement;response to stimulus;transport                                                                      | cytoplasm;extracellular;membrane;organelle lumen                                                   | protein binding                                                                                      |
| 23020        | cell differentiation;cell organization and biogenesis;metabolic process                                                                                          | membrane;nucleus;spliceosomal complex                                                              | catalytic activity;DNA binding;nucleotide binding;protein binding;RNA binding                        |
| 5245         | cell differentiation;cell organization and biogenesis;metabolic process;regulation of biological process;response to stimulus;transport                          | cell surface;cytoplasm;endosome;membrane;mitochondrion;nucleus                                     | DNA binding;protein binding                                                                          |
| 11335; 90416 | cell organization and biogenesis;metabolic process;regulation of biological process                                                                              | chromosome;membrane;nucleus                                                                        | protein binding                                                                                      |
| 3849         | cell death;cell organization and biogenesis;cell proliferation;cellular component movement;metabolic process                                                     | cytoskeleton;cytosol;membrane;nucleus                                                              | protein binding;structural molecule activity                                                         |
| 1973         | metabolic process;regulation of biological process                                                                                                               | cytoplasm;cytosol;membrane;nucleus                                                                 | catalytic activity;DNA binding;nucleotide binding;protein binding;RNA binding                        |
| 56005        | cell death;regulation of biological process                                                                                                                      | extracellular;organelle lumen                                                                      | protein binding                                                                                      |
| 10525        | regulation of biological process;response to stimulus;transport                                                                                                  | endoplasmic reticulum;extracellular;membrane;organelle lumen                                       | nucleotide binding;protein binding                                                                   |
| 6628         | cell organization and biogenesis;metabolic process;transport                                                                                                     | cytoplasm;cytosol;nucleus;spliceosomal complex                                                     | protein binding;RNA binding                                                                          |
| 6189         | cell differentiation;cell organization and biogenesis;metabolic process;regulation of biological process;transport                                               | cytoplasm;cytosol;endoplasmic reticulum;nucleus;ribosome                                           | protein binding;RNA binding;structural molecule activity                                             |
| 3105         | regulation of biological process;response to stimulus                                                                                                            | cell surface;endoplasmic reticulum;Golgi;membrane                                                  | protein binding;RNA binding                                                                          |
| 10327        | metabolic process                                                                                                                                                | cytosol;membrane                                                                                   | catalytic activity;protein binding                                                                   |
| 7178         | cell differentiation;cellular homeostasis;regulation of biological process;response to stimulus;transport                                                        | cytoplasm;cytosol;endosome;nucleus                                                                 | metal ion binding;protein binding;RNA binding                                                        |
| 8662         | cell organization and biogenesis;metabolic process;regulation of biological process                                                                              | cytoplasm;cytosol                                                                                  | protein binding;RNA binding;structural molecule activity                                             |
| 3848         | cell death;defense response;metabolic process;regulation of biological process;response to stimulus;transport                                                    | cytoskeleton;cytosol;extracellular;membrane;nucleus                                                | catalytic activity;motor activity;protein binding;receptor activity;structural molecule activity     |
| 830A         | regulation of biological process                                                                                                                                 | chromosome;nucleus                                                                                 | DNA binding;protein binding                                                                          |
| 4052         | metabolic process;regulation of biological process;response to stimulus                                                                                          | cell surface;extracellular;membrane;organelle lumen                                                | catalytic activity;metal ion binding;protein binding;receptor activity;signal transducer activity    |
| 9126         | cell division;cell organization and biogenesis;metabolic process;regulation of biological process;response to stimulus;transport                                 | chromosome;cytosol;nucleus                                                                         | catalytic activity;motor activity;nucleotide binding;protein binding;transporter activity            |
| 7155         | cell organization and biogenesis;cellular component movement;metabolic process;regulation of biological process                                                  | cytoplasm;cytosol;nucleus                                                                          | catalytic activity;DNA binding;metal ion binding;nucleotide binding;protein binding                  |
| 23406        | defense response;response to stimulus;transport                                                                                                                  | cytoplasm;cytoskeleton;extracellular;Golgi;membrane;organelle lumen                                | protein binding                                                                                      |
| 3482         | cell organization and biogenesis;regulation of biological process;response to stimulus;transport                                                                 | cell surface;cytoplasm;endosome;Golgi;membrane;nucleus;vacuole                                     | catalytic activity;protein binding;receptor activity;signal transducer activity;transporter activity |
| 5931         | cell organization and biogenesis;cell proliferation;development;metabolic process;regulation of biological process;response to stimulus                          | cytosol;nucleus                                                                                    | catalytic activity;protein binding;RNA binding                                                       |
| 2805         | metabolic process;regulation of biological process;response to stimulus                                                                                          | cytoplasm;cytosol;mitochondrion;nucleus;vacuole                                                    | catalytic activity                                                                                   |
| 7873         | cell differentiation;cell organization and biogenesis;regulation of biological process;response to stimulus;transport                                            | cytosol;endoplasmic reticulum;extracellular;nucleus                                                | protein binding;RNA binding                                                                          |
| 9967         | metabolic process;regulation of biological process;response to stimulus                                                                                          | nucleus                                                                                            | DNA binding;nucleotide binding;protein binding;receptor activity;RNA binding                         |
| 3690         | cell differentiation;cell growth;cell organization and biogenesis;cellular component movement;coagulation;regulation of biological process                       | cell surface;membrane;nucleus                                                                      | catalytic activity;protein binding;receptor activity;signal transducer activity                      |
| 6500         | cell organization and biogenesis;cellular homeostasis;metabolic process;regulation of biological process;response to stimulus                                    | cytoplasm;cytosol;nucleus                                                                          | catalytic activity;protein binding                                                                   |
| 55700        | cell organization and biogenesis                                                                                                                                 | cytoplasm;cytoskeleton;cytosol                                                                     | structural molecule activity                                                                         |
| 4013         |                                                                                                                                                                  |                                                                                                    |                                                                                                      |
| 667          | cell differentiation;defense response;metabolic process;regulation of biological process;response to stimulus;transport                                          | cell surface;cytosol;extracellular;Golgi;membrane;organelle lumen                                  | protein binding                                                                                      |
| 143244       | metabolic process;regulation of biological process;transport                                                                                                     | cytoplasm;endoplasmic reticulum;membrane;nucleus                                                   | RNA binding                                                                                          |
| 5868         | cell organization and biogenesis;coagulation;metabolic process;regulation of biological process;response to stimulus;transport                                   | cytoplasm;cytoskeleton;cytosol;endosome;membrane                                                   | catalytic activity;nucleotide binding;protein binding                                                |
| 5478         | cell organization and biogenesis;cellular component movement;metabolic process;regulation of biological process;response to stimulus                             | cytoplasm;cytosol;extracellular;membrane;nucleus;organelle lumen                                   | catalytic activity;protein binding;RNA binding                                                       |
| 3916         | cell death;regulation of biological process;response to stimulus;transport                                                                                       | cell surface;cytoplasm;cytosol;endosome;membrane;vacuole                                           | protein binding;receptor activity                                                                    |
| 10923        | cell organization and biogenesis;metabolic process;regulation of biological process;response to stimulus                                                         | nucleus                                                                                            | catalytic activity;DNA binding;protein binding;RNA binding                                           |
| 1457         | cell communication;cell death;metabolic process;regulation of biological process;response to stimulus                                                            | chromosome;cytoplasm;cytosol;membrane;nucleus                                                      | catalytic activity;enzyme regulator activity;nucleotide binding;protein binding                      |
| 823          | cell death;cell organization and biogenesis;metabolic process;regulation of biological process;transport                                                         | cytoplasm;cytosol;extracellular;membrane;mitochondrion;vacuole                                     | catalytic activity;metal ion binding;protein binding                                                 |
|              |                                                                                                                                                                  |                                                                                                    |                                                                                                      |
| 8243         | cell division;cell organization and biogenesis;metabolic process;regulation of biological process;response to stimulus                                           | chromosome;cytosol;nucleus                                                                         | nucleotide binding;protein binding;RNA binding                                                       |
| 2026         | metabolic process                                                                                                                                                | cytoplasm;cytosol;membrane                                                                         | catalytic activity;metal ion binding;protein binding                                                 |
| 51571        | regulation of biological process;transport                                                                                                                       | extracellular;membrane;organelle lumen                                                             | protein binding                                                                                      |
| 3956         | cell death;cell differentiation;cellular homeostasis;metabolic process;regulation of biological process;response to stimulus                                     | cell surface;cytoplasm;cytosol;extracellular;nucleus;organelle lumen                               | protein binding;RNA binding;signal transducer activity                                               |
| 6601         | cell organization and biogenesis;metabolic process;regulation of biological process                                                                              | nucleus                                                                                            | DNA binding;protein binding                                                                          |
| 27101        | cell differentiation;regulation of biological process;response to stimulus                                                                                       | cytoplasm;cytosol;nucleus                                                                          | protein binding                                                                                      |
| 214          | cell growth;cellular component movement;regulation of biological process;response to stimulus                                                                    | extracellular;membrane                                                                             | protein binding                                                                                      |
| 3507         | cell organization and biogenesis;cellular component movement;defense response;metabolic process;regulation of biological process                                 | cell surface;extracellular;membrane                                                                | DNA binding;protein binding                                                                          |
| 83442        | cellular homeostasis;metabolic process;regulation of biological process                                                                                          | cytoplasm;nucleus                                                                                  | catalytic activity                                                                                   |
| 10530        | cell organization and biogenesis;cellular homeostasis;metabolic process;regulation of biological process                                                         | cytoplasm;cytosol;nucleus;spliceosomal complex                                                     | catalytic activity;metal ion binding;protein binding;RNA binding                                     |
| 10576        | cell organization and biogenesis;metabolic process;regulation of biological process;transport                                                                    | cytoplasm;cytosol;extracellular;organelle lumen                                                    | nucleotide binding;protein binding                                                                   |
| 6285         | cell differentiation;cell organization and biogenesis;cell proliferation;defense response;regulation of biological process;response to stimulus                  | cytoplasm;extracellular;nucleus                                                                    | metal ion binding;protein binding                                                                    |
| 51292        | metabolic process                                                                                                                                                | cytosol                                                                                            | catalytic activity;metal ion binding                                                                 |
| 3149         | defense response;development;metabolic process;regulation of biological process;response to stimulus                                                             | chromosome;cytoplasm;nucleus                                                                       | DNA binding;protein binding;RNA binding                                                              |
| 976          | cell communication;cellular component movement;defense response;regulation of biological process;response to stimulus;transport                                  | cell surface;extracellular;membrane                                                                | metal ion binding;protein binding;receptor activity;signal transducer activity                       |
| 51631        | cell organization and biogenesis                                                                                                                                 | nucleus;spliceosomal complex                                                                       | protein binding;RNA binding                                                                          |
| 2027         | metabolic process                                                                                                                                                | cytoplasm;cytosol;membrane                                                                         | catalytic activity;metal ion binding                                                                 |
| 2885         | cell communication;cell differentiation;cell organization and biogenesis;cellular component movement;defense response;metabolic process                          | cytoplasm;cytosol;endosome;Golgi;membrane;nucleus                                                  | catalytic activity;protein binding;RNA binding                                                       |
| 4666         | metabolic process;regulation of biological process                                                                                                               | cytoplasm;nucleus                                                                                  | DNA binding                                                                                          |
| 5273         | regulation of biological process;transport                                                                                                                       | cytoplasm;cytosol;membrane;nucleus                                                                 | enzyme regulator activity                                                                            |
| 2288         | cell organization and biogenesis;metabolic process;regulation of biological process;response to stimulus;transport                                               | cytoplasm;cytoskeleton;cytosol;mitochondrion;nucleus                                               | catalytic activity;nucleotide binding;protein binding;RNA binding                                    |
| 1520         | cell organization and biogenesis;metabolic process;regulation of biological process;response to stimulus;transport                                               | extracellular;organelle lumen;vacuole                                                              | catalytic activity;protein binding                                                                   |
| 22820        | cellular component movement;transport                                                                                                                            | cytoplasm;cytosol;Golgi;membrane                                                                   | protein binding;structural molecule activity                                                         |
| 5589         | metabolic process;regulation of biological process;response to stimulus                                                                                          | endoplasmic reticulum;organelle lumen                                                              | metal ion binding;protein binding                                                                    |
| 516          | cell organization and biogenesis;metabolic process;transport                                                                                                     | membrane;mitochondrion                                                                             | catalytic activity;protein binding;transporter activity                                              |
| 4172         | metabolic process                                                                                                                                                | cytoplasm;membrane;nucleus                                                                         | catalytic activity;DNA binding;nucleotide binding;protein binding                                    |
| 1660         | cell death;cell differentiation;cell organization and biogenesis;defense response;metabolic process;regulation of biological process;response to stimulus        | cytoplasm;cytoskeleton;cytosol;membrane;nucleus;ribosome                                           | catalytic activity;DNA binding;metal ion binding;nucleotide binding;protein binding;RNA binding      |
| 5781         | cell differentiation;cell organization and biogenesis;cellular component movement;metabolic process;regulation of biological process                             | cytoplasm;cytosol;mitochondrion;nucleus                                                            | catalytic activity;protein binding                                                                   |
| 389898       | metabolic process;response to stimulus                                                                                                                           | cytoplasm;nucleus                                                                                  | catalytic activity;protein binding                                                                   |
| 1738         | cellular homeostasis;metabolic process;regulation of biological process                                                                                          | mitochondrion;organelle lumen                                                                      | catalytic activity;nucleotide binding;protein binding                                                |
| 2876         | cell death;cell differentiation;cell proliferation;cellular component movement;cellular homeostasis;metabolic process;regulation of biological process;transport | cytoplasm;cytosol;mitochondrion;organelle lumen                                                    | antioxidant activity;catalytic activity;protein binding                                              |
| 2517         | metabolic process;transport                                                                                                                                      | cytoplasm;extracellular;organelle lumen;vacuole                                                    | catalytic activity                                                                                   |
| 831          | regulation of biological process                                                                                                                                 | cytosol;endoplasmic reticulum;membrane                                                             | enzyme regulator activity;protein binding;RNA binding                                                |
| 8635         | metabolic process;transport                                                                                                                                      | endoplasmic reticulum;extracellular;organelle lumen;vacuole                                        | catalytic activity;RNA binding                                                                       |
| 3608         | metabolic process;regulation of biological process;response to stimulus;transport                                                                                | cytoplasm;extracellular;membrane;nucleus;organelle lumen                                           | catalytic activity;DNA binding;nucleotide binding;protein binding;RNA binding                        |
| 728689       | metabolic process                                                                                                                                                | cytoplasm                                                                                          | protein binding;RNA binding                                                                          |
| 8661         | cell organization and biogenesis;metabolic process;regulation of biological process                                                                              | cytoplasm;cytosol;membrane;nucleus                                                                 | protein binding;RNA binding;structural molecule activity                                             |
| 10989        | cell organization and biogenesis;cellular homeostasis                                                                                                            | membrane;mitochondrion                                                                             | protein binding;RNA binding                                                                          |
| 5524         | cell organization and biogenesis;metabolic process;regulation of biological process                                                                              | cytoplasm;nucleus                                                                                  | catalytic activity;enzyme regulator activity;nucleotide binding;protein binding                      |
| 327          | cell organization and biogenesis;metabolic process;transport                                                                                                     | cytoplasm;cytosol;extracellular;membrane                                                           | catalytic activity;protein binding;RNA binding                                                       |
| 2317         | cell differentiation;cell organization and biogenesis;development;regulation of biological process;response to stimulus                                          | cytoplasm;cytoskeleton;cytosol;membrane;nucleus                                                    | protein binding;RNA binding                                                                          |
| 3151         |                                                                                                                                                                  | chromosome;cytoplasm;nucleus                                                                       | DNA binding;protein binding;RNA binding                                                              |
| 9782         | defense response;regulation of biological process;response to stimulus                                                                                           | membrane;nucleus                                                                                   | metal ion binding;protein binding;RNA binding;structural molecule activity                           |
| 4043         | regulation of biological process;transport                                                                                                                       | cell surface;cytoplasm;endoplasmic reticulum;endosome;extracellular;Golgi;membrane;organelle lumen | protein binding                                                                                      |
| 1991         | cell organization and biogenesis;cellular component movement;cellular homeostasis;defense response;metabolic process;regulation of biological process            | cell surface;cytoplasm;extracellular;organelle lumen                                               | catalytic activity;protein binding                                                                   |
| 5516         | cell organization and biogenesis;metabolic process;regulation of biological process;response to stimulus                                                         | chromosome;cytoplasm;cytoskeleton;cytosol;nucleus                                                  | catalytic activity;metal ion binding;protein binding                                                 |
| 4076         | cell differentiation;regulation of biological process                                                                                                            | cytoplasm;cytosol;membrane                                                                         | protein binding;RNA binding                                                                          |
| 10574        | metabolic process;regulation of biological process;transport                                                                                                     | cytoplasm;cytosol;mitochondrion                                                                    | nucleotide binding;protein binding                                                                   |
| 64167        | cell communication;metabolic process;regulation of biological process;response to stimulus                                                                       | endoplasmic reticulum;membrane;organelle lumen                                                     | catalytic activity;metal ion binding                                                                 |
| 8411         | cell organization and biogenesis;metabolic process;transport                                                                                                     | cytoplasm;cytosol;endosome;membrane                                                                | catalytic activity;metal ion binding;motor activity;protein binding;transporter activity             |
| 9208         | metabolic process;regulation of biological process                                                                                                               | cytoplasm;cytoskeleton;cytosol;membrane;nucleus                                                    | DNA binding;protein binding;RNA binding                                                              |
| 163          | cell organization and biogenesis;cellular component movement;metabolic process;regulation of biological process;response to stimulus                             | cytosol;membrane                                                                                   | protein binding;transporter activity                                                                 |
| 440686       | cell organization and biogenesis;regulation of biological process                                                                                                | chromosome;nucleus                                                                                 | DNA binding;protein binding                                                                          |
| 4678         | cell organization and biogenesis;cell proliferation;metabolic process;response to stimulus;transport                                                             | cytoplasm;nucleus                                                                                  | protein binding                                                                                      |

|        |                                                                                                                                            |                                                                                                     |                                                                                               |
|--------|--------------------------------------------------------------------------------------------------------------------------------------------|-----------------------------------------------------------------------------------------------------|-----------------------------------------------------------------------------------------------|
| 10521  | cell differentiation;cell organization and biogenesis;defense response;metabolic process;regulation of biological process;response to      | cytoplasm;cytosol;membrane;nucleus                                                                  | catalytic activity;nucleotide binding;protein binding;RNA binding                             |
| 6917   | metabolic process;regulation of biological process;response to stimulus                                                                    | nucleus                                                                                             | DNA binding;metal ion binding;protein binding                                                 |
| 10437  | metabolic process;regulation of biological process;response to stimulus                                                                    | cytosol;extracellular;organelle lumen;vacuole                                                       | catalytic activity;protein binding                                                            |
| 2760   | metabolic process;regulation of biological process;response to stimulus;transport                                                          | cytoplasm;extracellular;mitochondrion;organelle lumen;vacuole                                       | catalytic activity;enzyme regulator activity;transporter activity                             |
| 7536   | cell differentiation;cell organization and biogenesis;metabolic process;regulation of biological process                                   | nucleus;ribosome;spliceosomal complex                                                               | metal ion binding;protein binding;RNA binding                                                 |
| 9793   | cell division;cell organization and biogenesis;regulation of biological process;transport                                                  | chromosome;cytoplasm;cytoskeleton;cytosol;membrane                                                  | protein binding                                                                               |
| 621    | metabolic process;regulation of biological process;response to stimulus;transport                                                          | cytoplasm;endoplasmic reticulum;membrane;organelle lumen;ribosome                                   | metal ion binding;protein binding;RNA binding                                                 |
| 6125   | cell organization and biogenesis;metabolic process;regulation of biological process;transport                                              | cytoplasm;cytosol;membrane;nucleus;ribosome                                                         | protein binding;RNA binding;structural molecule activity                                      |
| 1778   | cell division;cell organization and biogenesis;cellular component movement;regulation of biological process;transport                      | cytoplasm;cytoskeleton;cytosol;extracellular;membrane;organelle lumen                               | catalytic activity;motor activity;nucleotide binding;protein binding;RNA binding              |
| 6451   | cellular homeostasis;regulation of biological process                                                                                      | cytoplasm;nucleus                                                                                   | catalytic activity;protein binding                                                            |
| 10095  | cell organization and biogenesis;cellular component movement;regulation of biological process;response to stimulus                         | cytoplasm;cytoskeleton;cytosol                                                                      | protein binding;structural molecule activity                                                  |
| 6275   | cell organization and biogenesis;regulation of biological process                                                                          | extracellular;nucleus                                                                               | metal ion binding;protein binding;RNA binding                                                 |
| 427    | metabolic process;transport                                                                                                                | extracellular;organelle lumen;vacuole                                                               | catalytic activity                                                                            |
| 126133 | metabolic process                                                                                                                          | membrane                                                                                            | catalytic activity                                                                            |
| 11021  | cell organization and biogenesis;regulation of biological process;response to stimulus;transport                                           | cytosol;endosome;membrane;mitochondrion                                                             | catalytic activity;nucleotide binding;protein binding                                         |
| 4175   | metabolic process                                                                                                                          | nucleus                                                                                             | catalytic activity;DNA binding;nucleotide binding;protein binding                             |
| 830    | cell organization and biogenesis;cellular component movement;coagulation;defense response;regulation of biological process;respon          | cytoskeleton;cytosol;extracellular;membrane                                                         | protein binding                                                                               |
| 10549  | cell organization and biogenesis;cellular homeostasis;metabolic process;regulation of biological process;transport                         | cytoplasm;cytosol;endoplasmic reticulum;extracellular;mitochondrion;nucleus;organelle lumen         | antioxidant activity;catalytic activity;protein binding                                       |
| 6202   | cell organization and biogenesis;metabolic process;transport                                                                               | cytoplasm;cytosol;endoplasmic reticulum;membrane;nucleus;ribosome                                   | protein binding;RNA binding;structural molecule activity                                      |
| 11345  | cell communication;cell organization and biogenesis;metabolic process;regulation of biological process;response to stimulus;transpo        | cytoplasm;cytosol;Golgi;membrane;vacuole                                                            | protein binding                                                                               |
| 7317   | metabolic process;response to stimulus                                                                                                     | cytoplasm;cytosol;membrane;mitochondrion;nucleus                                                    | catalytic activity;nucleotide binding;protein binding;RNA binding                             |
| 51816  | development;metabolic process;regulation of biological process;transport                                                                   | cytosol;extracellular;organelle lumen                                                               | catalytic activity;metal ion binding;protein binding                                          |
| 8636   | metabolic process;response to stimulus;transport                                                                                           | cytosol;extracellular;nucleus;organelle lumen;vacuole                                               | catalytic activity                                                                            |
| 2040   | cell organization and biogenesis;regulation of biological process;transport                                                                | cytoplasm;cytoskeleton;cytosol;endoplasmic reticulum;membrane;mitochondrion                         | protein binding                                                                               |
| 6426   | cell differentiation;cell organization and biogenesis;metabolic process;regulation of biological process;transport                         | cytoplasm;nucleus;spliceosomal complex                                                              | protein binding;RNA binding                                                                   |
| 8761   | coagulation;metabolic process                                                                                                              | cytoplasm;cytosol;nucleus                                                                           | protein binding;RNA binding                                                                   |
| 5265   | cell organization and biogenesis;coagulation;defense response;metabolic process;regulation of biological process;response to stimu         | endoplasmic reticulum;extracellular;Golgi;membrane;organelle lumen                                  | enzyme regulator activity;protein binding                                                     |
| 989    | cell differentiation;cell division;cell organization and biogenesis;regulation of biological process                                       | chromosome;cytoplasm;cytoskeleton;cytosol;membrane;nucleus                                          | nucleotide binding;protein binding;structural molecule activity                               |
| 5204   | metabolic process;regulation of biological process                                                                                         | cytoplasm;nucleus                                                                                   | protein binding                                                                               |
| 92241  | response to stimulus                                                                                                                       | cytosol;nucleus                                                                                     | protein binding                                                                               |
| 4738   | cellular homeostasis;metabolic process;regulation of biological process;response to stimulus                                               | cytoplasm;cytosol;nucleus;proteasome                                                                | DNA binding;protein binding                                                                   |
| 5886   | metabolic process;regulation of biological process;response to stimulus                                                                    | cytosol;nucleus;ribosome                                                                            | protein binding;RNA binding;structural molecule activity                                      |
| 6139   | cell organization and biogenesis;metabolic process;transport                                                                               | cytoplasm;cytoskeleton;cytosol                                                                      | catalytic activity;nucleotide binding;protein binding;RNA binding                             |
| 6897   | metabolic process                                                                                                                          | cytoplasm;extracellular;membrane;nucleus                                                            | protein binding;receptor activity;signal transducer activity                                  |
| 11054  | regulation of biological process;response to stimulus                                                                                      | cytoplasm;cytosol;endoplasmic reticulum;extracellular;membrane;organelle lumen                      | catalytic activity;metal ion binding;protein binding                                          |
| 51752  | cell communication;cell differentiation;metabolic process;regulation of biological process;response to stimulus                            | endoplasmic reticulum;endosome;Golgi;membrane;vacuole                                               | receptor activity;signal transducer activity                                                  |
| 3118   | regulation of biological process;response to stimulus                                                                                      | nucleus                                                                                             | catalytic activity;DNA binding;enzyme regulator activity;protein binding;RNA binding          |
| 2962   | metabolic process;regulation of biological process;response to stimulus                                                                    | cytoplasm;cytosol;Golgi;nucleus                                                                     | DNA binding;metal ion binding;protein binding;RNA binding;transporter activity                |
| 7257   | cell differentiation;development;metabolic process;response to stimulus;transport                                                          | chromosome;cytoplasm;cytosol;nucleus                                                                | DNA binding;protein binding                                                                   |
| 8615   | cell organization and biogenesis;metabolic process;regulation of biological process;response to stimulus;transport                         | cytosol;membrane;nucleus                                                                            | metal ion binding;protein binding;RNA binding                                                 |
| 310    | cell differentiation;cell organization and biogenesis;cell proliferation;cellular homeostasis;metabolic process;regulation of biological p | membrane;mitochondrion;organelle lumen                                                              | catalytic activity;protein binding                                                            |
| 3295   | cell differentiation;metabolic process                                                                                                     | chromosome;cytoplasm;cytoskeleton;cytosol;membrane;nucleus                                          | nucleotide binding;protein binding                                                            |
| 4735   | cell differentiation;cell division;cell organization and biogenesis;regulation of biological process;response to stimulus                  | chromosome;cytoplasm;nucleus                                                                        | DNA binding;protein binding                                                                   |
| 3150   | cell organization and biogenesis;metabolic process;regulation of biological process;response to stimulus                                   | cytosol                                                                                             | protein binding                                                                               |
| 6251   | regulation of biological process;response to stimulus                                                                                      | cytoplasm;cytosol;membrane;nucleus;spliceosomal complex                                             | protein binding;RNA binding                                                                   |
| 10189  | cell differentiation;metabolic process;regulation of biological process;response to stimulus;transport                                     | cytoplasm;cytosol;nucleus                                                                           | catalytic activity;DNA binding;protein binding;RNA binding                                    |
| 8721   | cell differentiation;development;metabolic process;regulation of biological process                                                        | cytosol;membrane                                                                                    | protein binding;transporter activity                                                          |
| 160    | cell organization and biogenesis;cellular component movement;metabolic process;regulation of biological process;response to stimu          | cytoplasm;cytosol;nucleus                                                                           | DNA binding;RNA binding                                                                       |
| 54039  | metabolic process;regulation of biological process                                                                                         | cytoplasm;cytosol;mitochondrion;nucleus;organelle lumen                                             | antioxidant activity;catalytic activity;DNA binding;enzyme regulator activity;protein binding |
| 25824  | cell death;cellular homeostasis;defense response;metabolic process;regulation of biological process;response to stimulus                   | chromosome;cytoplasm;cytoskeleton                                                                   | nucleotide binding;protein binding                                                            |
| 23157  | cell differentiation;cell division                                                                                                         | cytoplasm;cytoskeleton;cytosol;endoplasmic reticulum;Golgi;membrane;vacuole                         | catalytic activity;metal ion binding;protein binding                                          |
| 84064  | metabolic process                                                                                                                          | cytoplasm;cytosol;membrane;nucleus                                                                  | protein binding                                                                               |
| 11337  | cell communication;cell death;cell organization and biogenesis;metabolic process;regulation of biological process;response to stimu        | cytoplasm;cytosol;extracellular;membrane;nucleus;spliceosomal complex                               | DNA binding;protein binding;RNA binding                                                       |
| 8570   | metabolic process;regulation of biological process;response to stimulus;transport                                                          | cytosol                                                                                             | DNA binding;protein binding;RNA binding                                                       |
| 4904   | metabolic process;regulation of biological process                                                                                         | cytosol                                                                                             | catalytic activity;nucleotide binding;protein binding;RNA binding                             |
| 2935   | cell organization and biogenesis;metabolic process                                                                                         | extracellular;nucleus;organelle lumen                                                               | protein binding                                                                               |
| 56729  | cell differentiation;regulation of biological process;response to stimulus;transport                                                       | chromosome;cytoplasm;cytoskeleton;cytosol;membrane;mitochondrion;nucleus                            | catalytic activity;enzyme regulator activity;protein binding                                  |
| 5518   | cell division;cell organization and biogenesis;metabolic process;regulation of biological process;response to stimulus                     | cytoplasm;cytosol;membrane;nucleus                                                                  | catalytic activity;metal ion binding;protein binding                                          |
| 5499   | cell division;metabolic process;regulation of biological process;response to stimulus                                                      | cytoplasm;cytoskeleton;membrane;nucleus                                                             | DNA binding;protein binding                                                                   |
| 10409  | cell differentiation;cell organization and biogenesis;regulation of biological process                                                     | endoplasmic reticulum;membrane                                                                      | catalytic activity;protein binding                                                            |
| 6185   | metabolic process;response to stimulus                                                                                                     | cytoplasm;cytoskeleton;cytosol;endoplasmic reticulum;extracellular;membrane;nucleus;organelle lumen | protein binding                                                                               |
| 6386   | cell communication;cell organization and biogenesis;regulation of biological process;response to stimulus;transport                        | extracellular;membrane;organelle lumen;vacuole                                                      | catalytic activity;protein binding                                                            |
| 566    | cellular component movement;defense response;metabolic process;regulation of biological process;response to stimulus;transport             | cytoplasm;cytosol;membrane;nucleus                                                                  | DNA binding;protein binding;RNA binding                                                       |
| 5094   | defense response;metabolic process;regulation of biological process;response to stimulus                                                   | cell surface;cytoplasm;membrane;mitochondrion;nucleus                                               | protein binding                                                                               |
| 11331  | cell organization and biogenesis;metabolic process;regulation of biological process;response to stimulus;transport                         | nucleus;spliceosomal complex                                                                        | protein binding;RNA binding                                                                   |
| 11338  | metabolic process;regulation of biological process;transport                                                                               | cytoplasm;cytosol;membrane;nucleus;ribosome                                                         | protein binding;RNA binding;structural molecule activity                                      |
| 6130   | cell organization and biogenesis;metabolic process;transport                                                                               | cytoplasm;cytosol;membrane                                                                          | nucleotide binding;protein binding;RNA binding                                                |
| 908    | metabolic process;regulation of biological process                                                                                         | cytosol;membrane;nucleus;spliceosomal complex                                                       | protein binding;RNA binding                                                                   |
| 3187   | metabolic process;regulation of biological process;response to stimulus                                                                    | cytoplasm;cytosol;nucleus;spliceosomal complex                                                      | protein binding;RNA binding                                                                   |
| 9939   | metabolic process;regulation of biological process;transport                                                                               | cytoplasm;cytosol                                                                                   | catalytic activity;protein binding                                                            |
| 1178   | cell death;development;regulation of biological process                                                                                    | cytosol;membrane;nucleus;ribosome                                                                   | protein binding;RNA binding;structural molecule activity                                      |
| 4736   | cell organization and biogenesis;metabolic process;response to stimulus;transport                                                          | nucleus;spliceosomal complex                                                                        | protein binding;RNA binding                                                                   |
| 10262  | metabolic process;regulation of biological process                                                                                         | cytoplasm;cytosol;extracellular;Golgi;membrane                                                      | protein binding;structural molecule activity                                                  |
| 1314   | regulation of biological process;transport                                                                                                 | cytosol;nucleus                                                                                     | catalytic activity;DNA binding;protein binding                                                |
| 5928   | cell organization and biogenesis;metabolic process;regulation of biological process;response to stimulus                                   | cytoplasm;cytoskeleton;cytosol;endoplasmic reticulum;Golgi;membrane;mitochondrion                   | catalytic activity;enzyme regulator activity;nucleotide binding;protein binding               |
| 10059  | cell death;cell organization and biogenesis;regulation of biological process;response to stimulus;transport                                | chromosome;nucleus                                                                                  | DNA binding;protein binding;RNA binding                                                       |
| 8971   | cell organization and biogenesis                                                                                                           | extracellular;mitochondrion;organelle lumen;vacuole                                                 | catalytic activity;protein binding                                                            |
| 1508   | cell differentiation;metabolic process;regulation of biological process;response to stimulus;transport                                     | cytoplasm;cytosol                                                                                   | catalytic activity;protein binding                                                            |
| 5110   | metabolic process                                                                                                                          | cytoplasm;membrane;nucleus                                                                          | catalytic activity;nucleotide binding;protein binding                                         |
| 22929  | metabolic process                                                                                                                          | cell surface;membrane;mitochondrion;organelle lumen                                                 | catalytic activity;protein binding;RNA binding                                                |
| 2806   | metabolic process;response to stimulus;transport                                                                                           | endoplasmic reticulum;extracellular;Golgi;membrane;organelle lumen                                  | metal ion binding;protein binding                                                             |
| 813    | metabolic process                                                                                                                          | extracellular;organelle lumen                                                                       | protein binding                                                                               |
| 8804   | cell proliferation;development;regulation of biological process;transport                                                                  | mitochondrion;nucleus;organelle lumen                                                               | catalytic activity;RNA binding                                                                |
| 1431   | metabolic process                                                                                                                          | extracellular;membrane                                                                              | catalytic activity;protein binding                                                            |
| 3514   | cell organization and biogenesis;cellular component movement;defense response;metabolic process;regulation of biological process           | cytoplasm;cytosol;membrane;ribosome                                                                 | protein binding;RNA binding;structural molecule activity                                      |
| 6224   | cell organization and biogenesis;metabolic process;transport                                                                               | cytoplasm;cytosol                                                                                   | catalytic activity;metal ion binding                                                          |
| 5464   | metabolic process                                                                                                                          | cytoplasm;cytosol;extracellular;nucleus;organelle lumen                                             | enzyme regulator activity;nucleotide binding;protein binding                                  |
| 10808  | metabolic process;regulation of biological process;response to stimulus;transport                                                          | cytoplasm;cytosol;extracellular;membrane                                                            | protein binding                                                                               |
| 20081  | cell proliferation;regulation of biological process;transport                                                                              | cytoplasm;cytoskeleton;cytosol;membrane                                                             | catalytic activity;motor activity;protein binding;RNA binding                                 |
| 1729   | cell organization and biogenesis;regulation of biological process;response to stimulus;transport                                           | cytoplasm;cytosol                                                                                   | catalytic activity;enzyme regulator activity;protein binding                                  |
| 11440  | cell division;metabolic process;regulation of biological process;response to stimulus;transport                                            | cytoplasm;cytosol;nucleus;proteasome                                                                | antioxidant activity;catalytic activity                                                       |
| 9352   | cellular homeostasis;metabolic process;regulation of biological process;response to stimulus;transport                                     | membrane                                                                                            | protein binding                                                                               |
| 4050   | cell communication;metabolic process;regulation of biological process;response to stimulus                                                 | cytoskeleton;endoplasmic reticulum;membrane;nucleus                                                 | protein binding;signal transducer activity                                                    |
| 9218   | cell death;cell organization and biogenesis;metabolic process;regulation of biological process;response to stimulus;transport              | cytoplasm;mitochondrion;nucleus;organelle lumen                                                     | nucleotide binding;protein binding;RNA binding                                                |
| 3313   | cell differentiation;cell organization and biogenesis;metabolic process;regulation of biological process;response to stimulus              | cytoplasm;cytoskeleton;cytosol;membrane;nucleus;vacuole                                             | metal ion binding;protein binding;RNA binding                                                 |
| 311    | cell division;response to stimulus;transport                                                                                               | cytoplasm;cytosol;membrane;nucleus                                                                  | catalytic activity;metal ion binding                                                          |
| 2739   | cell differentiation;metabolic process;regulation of biological process                                                                    | nucleus                                                                                             | catalytic activity;protein binding;RNA binding                                                |
| 11051  | cell organization and biogenesis;metabolic process                                                                                         | cytoplasm;vacuole                                                                                   | catalytic activity;protein binding                                                            |
| 4668   | metabolic process                                                                                                                          | cytoplasm;cytosol;nucleus;spliceosomal complex                                                      | protein binding;RNA binding                                                                   |
| 6632   | cell organization and biogenesis;metabolic process;transport                                                                               | cytoplasm;cytoskeleton;cytosol;membrane;nucleus                                                     | enzyme regulator activity;protein binding                                                     |
| 7266   | metabolic process;regulation of biological process                                                                                         | membrane;nucleus;spliceosomal complex                                                               | catalytic activity;protein binding                                                            |
| 5356   | cell organization and biogenesis;metabolic process;regulation of biological process                                                        |                                                                                                     |                                                                                               |

|                 |                                                                                                                                                                                                                        |                                                                                                              |                                                                                                 |
|-----------------|------------------------------------------------------------------------------------------------------------------------------------------------------------------------------------------------------------------------|--------------------------------------------------------------------------------------------------------------|-------------------------------------------------------------------------------------------------|
| 767558; 136319  | cell differentiation;cell organization and biogenesis;metabolic process;regulation of biological process;response to stimulus                                                                                          | cytoplasm;cytosol;nucleus                                                                                    | DNA binding;protein binding                                                                     |
| 8209; 102724023 |                                                                                                                                                                                                                        | mitochondrion                                                                                                |                                                                                                 |
| 7411            | cell organization and biogenesis;metabolic process                                                                                                                                                                     | cytoplasm;cytosol;nucleus                                                                                    | protein binding                                                                                 |
| 64710           | cell organization and biogenesis;cellular homeostasis;metabolic process;regulation of biological process;response to stimulus                                                                                          | chromosome;cytoplasm;nucleus                                                                                 | DNA binding;protein binding;RNA binding                                                         |
| 5699            | metabolic process;regulation of biological process;response to stimulus;transport                                                                                                                                      | cytoplasm;cytosol;nucleus;proteasome                                                                         | catalytic activity;protein binding                                                              |
| 3920            | cell communication;cell organization and biogenesis;cellular homeostasis;metabolic process;regulation of biological process;response to stimulus                                                                       | endosome;membrane;organelle lumen;vacuole                                                                    | protein binding                                                                                 |
| 57092           | metabolic process                                                                                                                                                                                                      | nucleus                                                                                                      | protein binding                                                                                 |
| 7247            | metabolic process;response to stimulus                                                                                                                                                                                 | cytoplasm;cytosol;nucleus                                                                                    | catalytic activity;DNA binding;protein binding;RNA binding                                      |
| 6137            | cell organization and biogenesis;metabolic process;transport                                                                                                                                                           | cytosol;membrane;nucleus;ribosome                                                                            | protein binding;RNA binding;structural molecule activity                                        |
| 56954           | metabolic process;transport                                                                                                                                                                                            | cytoplasm;cytosol;extracellular;mitochondrion;organelle lumen                                                | catalytic activity                                                                              |
| 9097            | cell communication;metabolic process;regulation of biological process                                                                                                                                                  | cell surface;cytoplasm;cytosol;membrane;nucleus;proteasome                                                   | catalytic activity;enzyme regulator activity;protein binding                                    |
| 3073            | metabolic process                                                                                                                                                                                                      | membrane;organelle lumen;vacuole                                                                             | catalytic activity;protein binding                                                              |
| 6902            | cell organization and biogenesis;metabolic process                                                                                                                                                                     | cytoplasm;cytoskeleton                                                                                       | protein binding;RNA binding                                                                     |
| 6294            | cell organization and biogenesis;metabolic process;regulation of biological process;response to stimulus                                                                                                               | nucleus                                                                                                      | DNA binding;protein binding;RNA binding                                                         |
| 23244           | cell division;cell organization and biogenesis;metabolic process;regulation of biological process;response to stimulus                                                                                                 | chromosome;cytosol;membrane;nucleus                                                                          | protein binding                                                                                 |
| 3500            | cell organization and biogenesis;cellular component movement;defense response;metabolic process;regulation of biological process                                                                                       | extracellular;membrane                                                                                       | catalytic activity;metal ion binding;protein binding                                            |
| 2162            | coagulation;metabolic process;response to stimulus;transport                                                                                                                                                           | cytoplasm;extracellular;organelle lumen                                                                      | catalytic activity;metal ion binding                                                            |
| 5757            | cell organization and biogenesis;metabolic process                                                                                                                                                                     | cytosol;nucleus                                                                                              | protein binding                                                                                 |
| 2633            | cell organization and biogenesis;defense response;regulation of biological process;response to stimulus                                                                                                                | cytoplasm;cytosol;extracellular;Golgi;membrane                                                               | catalytic activity;nucleotide binding;protein binding                                           |
| 10399           | cell death;cellular homeostasis;development;metabolic process;regulation of biological process;response to stimulus                                                                                                    | cytoplasm;cytosol;membrane;mitochondrion;nucleus;ribosome                                                    | enzyme regulator activity;protein binding;RNA binding;structural molecule activity              |
| 10938           | cell organization and biogenesis;coagulation;regulation of biological process;response to stimulus;transport                                                                                                           | endosome;membrane                                                                                            | metal ion binding;nucleotide binding;protein binding                                            |
| 8260            | cell organization and biogenesis;metabolic process;regulation of biological process                                                                                                                                    | cytoplasm;cytosol;membrane;nucleus;ribosome                                                                  | catalytic activity;protein binding                                                              |
| 22948           | metabolic process;regulation of biological process;response to stimulus;transport                                                                                                                                      | cytoplasm;cytoskeleton;cytosol                                                                               | nucleotide binding;protein binding;RNA binding                                                  |
| 27131           | cell organization and biogenesis;regulation of biological process;transport                                                                                                                                            | cytoplasm;cytosol;endosome;membrane                                                                          | protein binding                                                                                 |
| 9111            | defense response;metabolic process;regulation of biological process;response to stimulus                                                                                                                               | cytoplasm;cytosol                                                                                            | protein binding                                                                                 |
| 10695           | defense response;regulation of biological process;response to stimulus                                                                                                                                                 | endoplasmic reticulum;organelle lumen                                                                        | protein binding                                                                                 |
| 6418            | cell organization and biogenesis;metabolic process;regulation of biological process;transport                                                                                                                          | cytoplasm;cytosol;endoplasmic reticulum;nucleus                                                              | DNA binding;enzyme regulator activity;protein binding                                           |
| 5530            | cellular homeostasis;metabolic process;regulation of biological process;response to stimulus;transport                                                                                                                 | cytosol;membrane;mitochondrion;nucleus                                                                       | catalytic activity;metal ion binding;protein binding                                            |
| 27316           | cell differentiation;cell organization and biogenesis;metabolic process;regulation of biological process;response to stimulus                                                                                          | membrane;nucleus;spliceosomal complex                                                                        | DNA binding;protein binding;RNA binding                                                         |
| 1108            | cell organization and biogenesis;metabolic process;regulation of biological process                                                                                                                                    | cytoplasm;cytoskeleton;membrane;nucleus                                                                      | catalytic activity;DNA binding;metal ion binding;nucleotide binding;protein binding             |
| 9987            | metabolic process;regulation of biological process;response to stimulus                                                                                                                                                | cytoplasm;cytosol;nucleus;spliceosomal complex                                                               | DNA binding;protein binding;RNA binding                                                         |
| 22826           | metabolic process                                                                                                                                                                                                      | cytosol;nucleus                                                                                              | protein binding                                                                                 |
| 6120            | metabolic process                                                                                                                                                                                                      | cytosol                                                                                                      | catalytic activity;metal ion binding;protein binding                                            |
| 10457           | cell communication;cell differentiation;regulation of biological process;response to stimulus                                                                                                                          | membrane                                                                                                     | protein binding                                                                                 |
| 5048            | cell communication;cell differentiation;cell division;cell organization and biogenesis;cell proliferation;cellular component movement;defense response;regulation of biological process;response to stimulus;transport | chromosome;cytoplasm;cytoskeleton;cytosol;membrane;nucleus                                                   | catalytic activity;protein binding                                                              |
| 55379           |                                                                                                                                                                                                                        | endoplasmic reticulum;membrane;nucleus                                                                       | protein binding;RNA binding                                                                     |
| 392             | regulation of biological process;response to stimulus;transport                                                                                                                                                        | cytoplasm;cytosol;endosome;membrane                                                                          | enzyme regulator activity;protein binding                                                       |
| 10726           | cell division;cell organization and biogenesis;cell proliferation;development;metabolic process                                                                                                                        | cytoplasm;cytoskeleton;cytosol;nucleus                                                                       | protein binding                                                                                 |
| 5704            | metabolic process;regulation of biological process;response to stimulus;transport                                                                                                                                      | cytoplasm;cytosol;membrane;nucleus;proteasome                                                                | catalytic activity;nucleotide binding;protein binding;RNA binding                               |
| 6223            | cell differentiation;cell organization and biogenesis;cellular component movement;defense response;metabolic process;regulation of biological process                                                                  | cytoplasm;cytosol;membrane;nucleus;ribosome                                                                  | protein binding;RNA binding;structural molecule activity                                        |
| 400668          | cellular component movement;metabolic process;regulation of biological process;response to stimulus;transport                                                                                                          | extracellular;organelle lumen                                                                                | catalytic activity                                                                              |
| 5330            | cellular component movement;metabolic process;regulation of biological process;response to stimulus;transport                                                                                                          | cytoplasm;cytosol;extracellular                                                                              | catalytic activity;metal ion binding;protein binding;signal transducer activity                 |
| 353             | metabolic process;response to stimulus;transport                                                                                                                                                                       | cytoplasm;cytosol;extracellular;organelle lumen                                                              | catalytic activity;nucleotide binding                                                           |
| 10109           | cell organization and biogenesis;cellular component movement;regulation of biological process;response to stimulus                                                                                                     | cytoplasm;cytoskeleton;cytosol;endosome;membrane                                                             | protein binding;structural molecule activity                                                    |
| 25932           | cell differentiation;cell organization and biogenesis;cellular homeostasis;metabolic process;regulation of biological process;response to stimulus                                                                     | cell surface;cytoplasm;cytoskeleton;cytosol;membrane;mitochondrion;nucleus                                   | catalytic activity;protein binding;transporter activity                                         |
| 2289            | metabolic process                                                                                                                                                                                                      | cytoplasm;cytosol;membrane;nucleus                                                                           | catalytic activity;protein binding                                                              |
| 51602           | cell growth;metabolic process                                                                                                                                                                                          | cytosol;membrane;nucleus                                                                                     | protein binding;RNA binding                                                                     |
| 5861            | cell organization and biogenesis;cellular component movement;defense response;metabolic process;regulation of biological process                                                                                       | cytoplasm;cytosol;endoplasmic reticulum;endosome;Golgi;membrane                                              | catalytic activity;nucleotide binding;protein binding                                           |
| 4046            | cellular component movement;defense response;regulation of biological process;response to stimulus                                                                                                                     | cytoskeleton;membrane                                                                                        | protein binding;signal transducer activity                                                      |
| 1786            | cell organization and biogenesis;metabolic process;regulation of biological process;response to stimulus                                                                                                               | nucleus                                                                                                      | catalytic activity;DNA binding;metal ion binding;nucleotide binding;protein binding;RNA binding |
| 128866          | cell communication;cell organization and biogenesis;metabolic process;regulation of biological process;response to stimulus;transport                                                                                  | cytoplasm;cytosol;endosome;membrane;nucleus                                                                  | protein binding                                                                                 |
| 6749            | metabolic process;regulation of biological process;response to stimulus                                                                                                                                                | chromosome;nucleus                                                                                           | DNA binding;protein binding;RNA binding                                                         |
| 4288            | cell proliferation;metabolic process;regulation of biological process;response to stimulus                                                                                                                             | chromosome;cytoplasm;membrane;nucleus                                                                        | DNA binding;nucleotide binding;protein binding;RNA binding                                      |
| 10483           | transport                                                                                                                                                                                                              | cytoplasm;cytosol;endoplasmic reticulum;membrane                                                             | metal ion binding;protein binding                                                               |
| 811             | cell differentiation;cell organization and biogenesis;cellular homeostasis;metabolic process;regulation of biological process;response to stimulus                                                                     | cell surface;cytoplasm;cytosol;endoplasmic reticulum;extracellular;Golgi;membrane;nucleus;organelle lumen    | DNA binding;metal ion binding;protein binding;RNA binding                                       |
| 5881            | cell communication;cell organization and biogenesis;regulation of biological process;response to stimulus                                                                                                              | cytoplasm;cytoskeleton;cytosol;membrane                                                                      | catalytic activity;nucleotide binding;protein binding                                           |
| 10055           | metabolic process;regulation of biological process                                                                                                                                                                     | cytoplasm;nucleus                                                                                            | catalytic activity;enzyme regulator activity;protein binding                                    |
| 26156           | cell differentiation;metabolic process;regulation of biological process                                                                                                                                                | membrane;nucleus                                                                                             | protein binding;RNA binding                                                                     |
| 4332            | cellular component movement;defense response;metabolic process;regulation of biological process;response to stimulus;transport                                                                                         | cytoplasm;extracellular;nucleus;organelle lumen                                                              | DNA binding;protein binding;transporter activity                                                |
| 3615            | cell organization and biogenesis;cell proliferation;metabolic process;response to stimulus;transport                                                                                                                   | cytoplasm;cytosol;extracellular;membrane;nucleus;organelle lumen                                             | catalytic activity;DNA binding;metal ion binding;nucleotide binding;protein binding;RNA binding |
| 5885            | cell death;cell division;cell organization and biogenesis;metabolic process;regulation of biological process;response to stimulus                                                                                      | chromosome;cytosol;membrane;nucleus                                                                          | protein binding                                                                                 |
| 16              | metabolic process;regulation of biological process                                                                                                                                                                     | cytoplasm;cytosol;membrane;mitochondrion                                                                     | catalytic activity;metal ion binding;nucleotide binding;RNA binding                             |
| 11325           | metabolic process;regulation of biological process                                                                                                                                                                     | cytoplasm;cytosol;membrane;nucleus                                                                           | catalytic activity;nucleotide binding;protein binding;RNA binding                               |
| 10598           | regulation of biological process;response to stimulus                                                                                                                                                                  | cytoplasm;cytosol;endoplasmic reticulum                                                                      | enzyme regulator activity;protein binding                                                       |
| 3502            | cell organization and biogenesis;defense response;metabolic process;regulation of biological process;response to stimulus                                                                                              | extracellular;membrane                                                                                       | catalytic activity;protein binding                                                              |
| 6188            | cell death;cell division;cell organization and biogenesis;metabolic process;regulation of biological process;response to stimulus;transport                                                                            | cytoplasm;cytoskeleton;cytosol;endoplasmic reticulum;membrane;mitochondrion;nucleus;organelle lumen;ribosome | catalytic activity;DNA binding;protein binding;RNA binding;structural molecule activity         |
| 8417            | cell organization and biogenesis;regulation of biological process;transport                                                                                                                                            | endosome;membrane;vacuole                                                                                    | protein binding                                                                                 |
| 6636            | cell organization and biogenesis;metabolic process;transport                                                                                                                                                           | cytoplasm;cytosol;nucleus;spliceosomal complex                                                               | protein binding;RNA binding                                                                     |
| 2107            | cell organization and biogenesis;metabolic process;regulation of biological process                                                                                                                                    | cytoplasm;cytosol;nucleus                                                                                    | protein binding;RNA binding                                                                     |
| 1854            | metabolic process                                                                                                                                                                                                      | mitochondrion;nucleus                                                                                        | catalytic activity;metal ion binding;protein binding;RNA binding                                |
| 10982           | cell division;cell proliferation;regulation of biological process;response to stimulus                                                                                                                                 | cytoplasm;cytoskeleton                                                                                       | protein binding                                                                                 |
| 6161            | cell organization and biogenesis;metabolic process;response to stimulus;transport                                                                                                                                      | cytosol;membrane;ribosome                                                                                    | RNA binding;structural molecule activity                                                        |
| 29766           | cell organization and biogenesis;regulation of biological process                                                                                                                                                      | cytoplasm;cytoskeleton                                                                                       | protein binding                                                                                 |
| 23385           | cell proliferation;metabolic process;regulation of biological process;response to stimulus;transport                                                                                                                   | endoplasmic reticulum;Golgi;membrane                                                                         | catalytic activity;protein binding                                                              |
| 84817           | metabolic process;regulation of biological process;response to stimulus                                                                                                                                                | cytoplasm;cytosol                                                                                            | antioxidant activity;catalytic activity;protein binding                                         |
| 1965            | cell communication;metabolic process;regulation of biological process;response to stimulus;transport                                                                                                                   | cytoplasm;cytosol;membrane;nucleus;ribosome                                                                  | protein binding;RNA binding                                                                     |
| 59345           | metabolic process;regulation of biological process;response to stimulus                                                                                                                                                | cytosol;membrane                                                                                             | protein binding;signal transducer activity                                                      |
| 9550            | cellular homeostasis;regulation of biological process;response to stimulus;transport                                                                                                                                   | cytosol;membrane                                                                                             | catalytic activity;protein binding;transporter activity                                         |
| 8789            | metabolic process                                                                                                                                                                                                      | cytoplasm;cytosol;membrane;nucleus                                                                           | catalytic activity;metal ion binding;protein binding                                            |
| 55611           | metabolic process;regulation of biological process;response to stimulus                                                                                                                                                | cytoplasm;cytosol;nucleus                                                                                    | catalytic activity;nucleotide binding;protein binding                                           |
| 23646           | metabolic process                                                                                                                                                                                                      | endoplasmic reticulum;membrane                                                                               | catalytic activity;protein binding                                                              |
| 7073            | cell death;cell division;defense response;regulation of biological process;response to stimulus                                                                                                                        | cytoplasm;nucleus;vacuole                                                                                    | DNA binding;RNA binding                                                                         |
| 10954           | cellular homeostasis;metabolic process;regulation of biological process;response to stimulus                                                                                                                           | endoplasmic reticulum;membrane;organelle lumen                                                               | catalytic activity;protein binding                                                              |
| 2224            | metabolic process;regulation of biological process                                                                                                                                                                     | cytoplasm;cytosol;mitochondrion                                                                              | catalytic activity;metal ion binding;RNA binding                                                |
| 1933            | metabolic process;response to stimulus                                                                                                                                                                                 | cytoplasm;cytosol;endoplasmic reticulum;nucleus                                                              | protein binding;RNA binding                                                                     |
| 8668            | cell organization and biogenesis;metabolic process;regulation of biological process                                                                                                                                    | cytoplasm;cytosol                                                                                            | protein binding;RNA binding                                                                     |
| 8667            | cell organization and biogenesis;metabolic process;regulation of biological process                                                                                                                                    | cytoplasm;cytosol;membrane                                                                                   | protein binding;RNA binding                                                                     |
| 5049            | metabolic process;regulation of biological process;transport                                                                                                                                                           | cytoplasm;cytosol;extracellular;membrane;organelle lumen                                                     | catalytic activity;protein binding                                                              |
| 6222            | cell organization and biogenesis;metabolic process;transport                                                                                                                                                           | cytoplasm;cytosol;membrane;nucleus;ribosome                                                                  | protein binding;RNA binding;structural molecule activity                                        |
| 220988          | metabolic process;transport                                                                                                                                                                                            | cytoplasm;nucleus;spliceosomal complex                                                                       | protein binding;RNA binding;transporter activity                                                |
| 5954            | metabolic process                                                                                                                                                                                                      | endoplasmic reticulum;organelle lumen                                                                        | metal ion binding;protein binding                                                               |
| 2130            | metabolic process;regulation of biological process                                                                                                                                                                     | cytoplasm;membrane;nucleus                                                                                   | metal ion binding;protein binding;RNA binding                                                   |
| 22872           | cell organization and biogenesis;response to stimulus;transport                                                                                                                                                        | cytoplasm;cytosol;endoplasmic reticulum;membrane                                                             | protein binding                                                                                 |
| 1653            | cell organization and biogenesis;development;metabolic process;regulation of biological process;response to stimulus                                                                                                   | cytoplasm;cytosol;membrane;nucleus                                                                           | catalytic activity;DNA binding;nucleotide binding;protein binding;RNA binding                   |
| 6037            | defense response;metabolic process;response to stimulus;transport                                                                                                                                                      | extracellular;organelle lumen                                                                                | catalytic activity                                                                              |
| 1639            | cell division;cell organization and biogenesis;cellular component movement;metabolic process;regulation of biological process;transport                                                                                | chromosome;cytoplasm;cytoskeleton;cytosol;membrane;nucleus                                                   | catalytic activity;motor activity;protein binding                                               |
| 3538            | cell organization and biogenesis;cellular component movement;defense response;metabolic process;regulation of biological process                                                                                       | extracellular;membrane                                                                                       | catalytic activity;protein binding                                                              |
| 2804            | cell organization and biogenesis;metabolic process;regulation of biological process;transport                                                                                                                          | Golgi;membrane                                                                                               | protein binding                                                                                 |
| 8665            | metabolic process                                                                                                                                                                                                      | cytoplasm;cytosol;membrane                                                                                   | catalytic activity;DNA binding;motor activity;protein binding;RNA binding;transporter activity  |
| 23593           | cell organization and biogenesis;regulation of biological process;transport                                                                                                                                            | cytoplasm;extracellular;mitochondrion;organelle lumen                                                        | catalytic activity;protein binding;RNA binding                                                  |
|                 |                                                                                                                                                                                                                        |                                                                                                              | protein binding                                                                                 |

|        |                                                                                                                                                                                        |                                                                                               |                                                                                                                  |
|--------|----------------------------------------------------------------------------------------------------------------------------------------------------------------------------------------|-----------------------------------------------------------------------------------------------|------------------------------------------------------------------------------------------------------------------|
| 231    | metabolic process;regulation of biological process;response to stimulus                                                                                                                | cytoplasm;cytosol;extracellular;vacuole                                                       | catalytic activity;protein binding                                                                               |
| 10915  | metabolic process;regulation of biological process                                                                                                                                     | nucleus                                                                                       | protein binding;RNA binding                                                                                      |
| 191    | defense response;metabolic process;response to stimulus;transport                                                                                                                      | cytoplasm;cytosol;nucleus                                                                     | catalytic activity;nucleotide binding;protein binding                                                            |
| 23549  | metabolic process                                                                                                                                                                      | cytoplasm;cytosol;nucleus                                                                     | catalytic activity;metal ion binding;protein binding                                                             |
| 3837   | cell organization and biogenesis;cellular component movement;metabolic process;regulation of biological process;response to stimulus                                                   | cytoplasm;cytosol;extracellular;membrane;nucleus;organelle lumen                              | metal ion binding;protein binding;RNA binding;transporter activity                                               |
| 26528  | cell differentiation;cell proliferation;development;regulation of biological process                                                                                                   | cytoplasm;cytosol;nucleus                                                                     | protein binding;RNA binding                                                                                      |
| 5860   | metabolic process;response to stimulus                                                                                                                                                 | cytoplasm;cytosol;mitochondrion                                                               | catalytic activity;nucleotide binding;protein binding                                                            |
| 8565   | cell death;metabolic process;regulation of biological process;response to stimulus                                                                                                     | cytoplasm;cytosol                                                                             | catalytic activity;nucleotide binding;protein binding;RNA binding;signal transducer activity                     |
| 6102   | cell organization and biogenesis;metabolic process;regulation of biological process;transport                                                                                          | cytoplasm;Golgi;membrane                                                                      | catalytic activity;enzyme regulator activity;nucleotide binding;protein binding                                  |
| 3840   | regulation of biological process;response to stimulus;transport                                                                                                                        | cytoplasm;cytosol;nucleus                                                                     | protein binding;transporter activity                                                                             |
| 8498   | cell organization and biogenesis;metabolic process;regulation of biological process;transport                                                                                          | cytoplasm;nucleus                                                                             | enzyme regulator activity;protein binding                                                                        |
| 6156   | cell organization and biogenesis;defense response;metabolic process;response to stimulus;transport                                                                                     | cytosol;membrane;nucleus;ribosome                                                             | protein binding;RNA binding;structural molecule activity                                                         |
| 6431   | cell organization and biogenesis;metabolic process;regulation of biological process;response to stimulus;transport                                                                     | nucleus                                                                                       | protein binding;RNA binding                                                                                      |
| 9958   | cell organization and biogenesis;metabolic process;regulation of biological process;response to stimulus                                                                               | cytoplasm;cytosol;mitochondrion;nucleus                                                       | catalytic activity;protein binding                                                                               |
| 115207 | cell organization and biogenesis;transport                                                                                                                                             | membrane                                                                                      | protein binding;RNA binding;transporter activity                                                                 |
| 6146   | cell organization and biogenesis;metabolic process;transport                                                                                                                           | cytoplasm;cytosol;nucleus;ribosome                                                            | protein binding;RNA binding;structural molecule activity                                                         |
| 3123   | cell organization and biogenesis;regulation of biological process;response to stimulus                                                                                                 | cell surface;endoplasmic reticulum;endosome;Golgi;membrane;vacuole                            | protein binding                                                                                                  |
| 51726  | metabolic process;regulation of biological process                                                                                                                                     | cytoplasm;endoplasmic reticulum;membrane;nucleus;organelle lumen                              | protein binding                                                                                                  |
| 654346 |                                                                                                                                                                                        | cytosol                                                                                       | protein binding                                                                                                  |
| 529    | cellular homeostasis;regulation of biological process;response to stimulus;transport                                                                                                   | cytoplasm;cytosol;endosome;membrane;mitochondrion                                             | catalytic activity;protein binding;transporter activity                                                          |
| 6138   | cell organization and biogenesis;metabolic process;response to stimulus;transport                                                                                                      | cytosol;membrane;nucleus;ribosome                                                             | protein binding;RNA binding;structural molecule activity                                                         |
| 2495   | cellular homeostasis;metabolic process;regulation of biological process;response to stimulus;transport                                                                                 | cytosol;extracellular;nucleus;vacuole                                                         | catalytic activity;metal ion binding;protein binding                                                             |
| 3301   | cellular component movement;metabolic process;regulation of biological process;response to stimulus;transport                                                                          | cytoplasm;cytoskeleton;cytosol;endoplasmic reticulum;membrane;mitochondrion;nucleus           | enzyme regulator activity;metal ion binding;nucleotide binding;protein binding                                   |
| 5591   | cell death;cell differentiation;cell organization and biogenesis;cell proliferation;defense response;metabolic process;regulation of biological process;response to stimulus;transport | cytosol;membrane;nucleus                                                                      | catalytic activity;DNA binding;nucleotide binding;protein binding;RNA binding                                    |
| 5547   | defense response;metabolic process;regulation of biological process;response to stimulus;transport                                                                                     | membrane;vacuole                                                                              | catalytic activity;protein binding                                                                               |
| 3157   | metabolic process;regulation of biological process;response to stimulus                                                                                                                | cytoplasm;cytosol                                                                             | catalytic activity;protein binding                                                                               |
| 10155  | cell organization and biogenesis;defense response;metabolic process;regulation of biological process;response to stimulus                                                              | chromosome;nucleus                                                                            | catalytic activity;DNA binding;metal ion binding;protein binding;RNA binding                                     |
| 10212  | metabolic process;regulation of biological process;response to stimulus;transport                                                                                                      | cytoplasm;membrane;nucleus;spliceosomal complex                                               | catalytic activity;nucleotide binding;protein binding;RNA binding                                                |
| 3093   | cell organization and biogenesis;metabolic process;regulation of biological process;response to stimulus                                                                               | cytoplasm;cytosol;nucleus                                                                     | catalytic activity;nucleotide binding;protein binding                                                            |
| 4144   | cell organization and biogenesis;metabolic process                                                                                                                                     | cytosol                                                                                       | catalytic activity;metal ion binding;nucleotide binding;protein binding                                          |
| 6432   | metabolic process;regulation of biological process;transport                                                                                                                           | cytoplasm;nucleus                                                                             | metal ion binding;protein binding;RNA binding                                                                    |
| 10093  | cell organization and biogenesis;regulation of biological process;response to stimulus                                                                                                 | cytoplasm;cytoskeleton;cytosol                                                                | protein binding;structural molecule activity                                                                     |
| 8226   | metabolic process                                                                                                                                                                      | cytoplasm;cytosol                                                                             | catalytic activity;metal ion binding                                                                             |
| 2771   | cell division;cell proliferation;metabolic process;regulation of biological process;response to stimulus                                                                               | cytoplasm;cytoskeleton;cytosol;membrane;nucleus                                               | catalytic activity;metal ion binding;nucleotide binding;protein binding;signal transducer activity               |
| 51074  | cell death;cell organization and biogenesis;metabolic process;regulation of biological process                                                                                         | cytoplasm                                                                                     | catalytic activity;metal ion binding;protein binding                                                             |
| 6208   | cell differentiation;cell organization and biogenesis;metabolic process;regulation of biological process;transport                                                                     | cytosol;membrane;mitochondrion;ribosome                                                       | protein binding;RNA binding;structural molecule activity;translation regulator activity                          |
| 5813   | cell differentiation;metabolic process;regulation of biological process                                                                                                                | cytoplasm;nucleus                                                                             | DNA binding;protein binding;RNA binding;translation regulator activity                                           |
| 4924   | metabolic process;regulation of biological process;response to stimulus                                                                                                                | cytoplasm;endoplasmic reticulum;endosome;extracellular;Golgi;membrane;nucleus;organelle lumen | DNA binding;metal ion binding;protein binding                                                                    |
| 6633   | cell organization and biogenesis;metabolic process;transport                                                                                                                           | cytoplasm;cytosol;nucleus;spliceosomal complex                                                | protein binding;RNA binding                                                                                      |
| 26135  | regulation of biological process                                                                                                                                                       | cytoplasm;cytosol;membrane;nucleus                                                            | protein binding;RNA binding                                                                                      |
| 6152   | cell organization and biogenesis;cellular component movement;metabolic process;regulation of biological process;transport                                                              | cytoplasm;cytosol;membrane;ribosome                                                           | protein binding;RNA binding;structural molecule activity                                                         |
| 9937   | cell organization and biogenesis;metabolic process;regulation of biological process;response to stimulus                                                                               | cytosol                                                                                       | enzyme regulator activity                                                                                        |
| 2314   | cell organization and biogenesis;development;metabolic process;regulation of biological process                                                                                        | cytoplasm;cytoskeleton;cytosol;nucleus                                                        | protein binding                                                                                                  |
| 3119   | regulation of biological process;response to stimulus                                                                                                                                  | endoplasmic reticulum;endosome;Golgi;membrane;vacuole                                         | receptor activity;signal transducer activity                                                                     |
| 4522   | metabolic process                                                                                                                                                                      | cytoplasm;cytosol;membrane;mitochondrion                                                      | catalytic activity;nucleotide binding;protein binding                                                            |
| 84932  | regulation of biological process;response to stimulus;transport                                                                                                                        | endoplasmic reticulum;Golgi;membrane                                                          | catalytic activity;nucleotide binding;protein binding                                                            |
| 372    | response to stimulus;transport                                                                                                                                                         | cytoplasm;cytosol;endoplasmic reticulum;Golgi;membrane                                        | RNA binding                                                                                                      |
| 26578  | regulation of biological process;response to stimulus;transport                                                                                                                        | cytoplasm;extracellular;organelle lumen                                                       | protein binding                                                                                                  |
| 8669   | cell organization and biogenesis;metabolic process;regulation of biological process                                                                                                    | cytoplasm;cytosol                                                                             | protein binding;RNA binding                                                                                      |
| 1371   | metabolic process;response to stimulus                                                                                                                                                 | cytosol;membrane;mitochondrion                                                                | catalytic activity;protein binding;structural molecule activity                                                  |
| 7174   | metabolic process                                                                                                                                                                      | cytoplasm;cytosol;nucleus                                                                     | catalytic activity;protein binding                                                                               |
| 84844  | metabolic process;regulation of biological process                                                                                                                                     | nucleus;spliceosomal complex                                                                  | DNA binding;metal ion binding;RNA binding                                                                        |
| 3336   | cell differentiation;metabolic process;regulation of biological process;response to stimulus                                                                                           | cytoplasm;membrane;mitochondrion;organelle lumen                                              | metal ion binding;nucleotide binding;protein binding;RNA binding                                                 |
| 10728  | cell organization and biogenesis;metabolic process;regulation of biological process;response to stimulus                                                                               | cytoplasm;cytosol;nucleus                                                                     | catalytic activity;protein binding                                                                               |
| 1399   | metabolic process;regulation of biological process;response to stimulus                                                                                                                | cytoplasm;cytosol;endosome                                                                    | protein binding;RNA binding;signal transducer activity                                                           |
| 10226  | transport                                                                                                                                                                              | cytoplasm;cytosol;endosome;Golgi;membrane                                                     | protein binding                                                                                                  |
| 5708   | metabolic process;regulation of biological process;response to stimulus;transport                                                                                                      | cytoplasm;cytosol;extracellular;membrane;nucleus;organelle lumen;proteasome                   | catalytic activity;enzyme regulator activity;nucleotide binding;protein binding                                  |
| 6128   | cell organization and biogenesis;metabolic process;regulation of biological process;transport                                                                                          | cytosol;membrane;nucleus;ribosome                                                             | DNA binding;protein binding;RNA binding;structural molecule activity                                             |
| 6635   | cell organization and biogenesis;metabolic process;transport                                                                                                                           | cytoplasm;cytosol;nucleus;spliceosomal complex                                                | protein binding;RNA binding                                                                                      |
| 27243  | cell communication;cell organization and biogenesis;metabolic process;regulation of biological process;response to stimulus;transport                                                  | chromosome;cytosol;endosome;membrane                                                          | protein binding                                                                                                  |
| 54440  | regulation of biological process                                                                                                                                                       | cytoplasm;nucleus                                                                             | protein binding                                                                                                  |
| 3925   | cell differentiation;cell organization and biogenesis;development;regulation of biological process;response to stimulus                                                                | cytoplasm;cytoskeleton;cytosol;membrane                                                       | protein binding;signal transducer activity                                                                       |
| 7114   | cell differentiation;cell organization and biogenesis;metabolic process;regulation of biological process;response to stimulus;transport                                                | cytoplasm;cytoskeleton;cytosol;extracellular;membrane;nucleus;organelle lumen                 | catalytic activity;metal ion binding;nucleotide binding;protein binding;RNA binding;structural molecule activity |
| 682    | cell organization and biogenesis;cellular component movement;metabolic process;regulation of biological process;response to stimulus                                                   | membrane;mitochondrion                                                                        | protein binding;transporter activity                                                                             |
| 23499  | cell organization and biogenesis;regulation of biological process;response to stimulus;transport                                                                                       | cytoplasm;cytoskeleton;Golgi;membrane                                                         | catalytic activity;metal ion binding;motor activity;protein binding;RNA binding                                  |
| 1476   | regulation of biological process;response to stimulus;transport                                                                                                                        | cytoplasm;cytosol;extracellular;nucleus;organelle lumen                                       | enzyme regulator activity;protein binding;RNA binding                                                            |
| 9276   | transport                                                                                                                                                                              | cytoplasm;cytosol;Golgi;membrane                                                              | protein binding;structural molecule activity                                                                     |
| 25801  | cell organization and biogenesis;metabolic process;transport                                                                                                                           | cytoplasm;cytosol;extracellular;membrane;organelle lumen                                      | catalytic activity;metal ion binding;protein binding                                                             |
| 5196   | cellular component movement;defense response;regulation of biological process;response to stimulus;transport                                                                           | cytoplasm;extracellular;organelle lumen                                                       | protein binding                                                                                                  |
| 1994   | development;metabolic process;regulation of biological process                                                                                                                         | cytoplasm;cytosol;membrane;nucleus                                                            | protein binding;RNA binding                                                                                      |
| 7323   | cell death;metabolic process;regulation of biological process;response to stimulus                                                                                                     | cytosol;endosome;membrane                                                                     | catalytic activity;nucleotide binding;protein binding                                                            |
| 1743   | metabolic process                                                                                                                                                                      | membrane;mitochondrion;nucleus;organelle lumen                                                | catalytic activity                                                                                               |
| 6449   | metabolic process;regulation of biological process                                                                                                                                     | cytoplasm;cytosol;membrane;nucleus                                                            | protein binding                                                                                                  |
| 1086   | cellular component movement;response to stimulus;transport                                                                                                                             | membrane                                                                                      | protein binding                                                                                                  |
| 2029   | cell division;regulation of biological process;response to stimulus;transport                                                                                                          | cytoplasm                                                                                     | enzyme regulator activity;protein binding                                                                        |
| 7072   | cell death;regulation of biological process;response to stimulus                                                                                                                       | cytoplasm;cytosol;nucleus                                                                     | protein binding;RNA binding                                                                                      |
| 3383   | cell communication;cell organization and biogenesis;cellular component movement;cellular homeostasis;defense response;regulation of biological process                                 | cell surface;membrane                                                                         | protein binding;receptor activity;signal transducer activity                                                     |
| 216    | metabolic process;regulation of biological process                                                                                                                                     | cytoplasm;cytosol                                                                             | catalytic activity;enzyme regulator activity;nucleotide binding                                                  |
| 5912   | cell organization and biogenesis;regulation of biological process;response to stimulus;transport                                                                                       | cytosol;endosome;membrane                                                                     | catalytic activity;nucleotide binding;protein binding                                                            |
| 54205  | cell death;cell organization and biogenesis;metabolic process;regulation of biological process;response to stimulus;transport                                                          | cytosol;membrane;mitochondrion;nucleus                                                        | catalytic activity;metal ion binding;protein binding                                                             |
| 388    | cell death;cell differentiation;development;regulation of biological process;response to stimulus;transport                                                                            | cytosol;endosome;membrane;nucleus                                                             | catalytic activity;nucleotide binding;protein binding                                                            |
| 2990   | metabolic process;transport                                                                                                                                                            | extracellular;membrane;organelle lumen;vacuole                                                | catalytic activity;protein binding                                                                               |
| 7336   | cell proliferation;metabolic process;regulation of biological process;response to stimulus                                                                                             | cytoplasm;nucleus                                                                             | catalytic activity;protein binding                                                                               |
| 3385   | cell organization and biogenesis;regulation of biological process;response to stimulus;transport                                                                                       | membrane                                                                                      | protein binding                                                                                                  |
| 8607   | cell division;cell organization and biogenesis;metabolic process;regulation of biological process;response to stimulus                                                                 | cytoplasm;cytoskeleton;cytosol;membrane;nucleus                                               | catalytic activity;nucleotide binding;protein binding                                                            |
| 199    | cell communication;cell organization and biogenesis;defense response;regulation of biological process;response to stimulus                                                             | cytoplasm;cytoskeleton;cytosol;membrane;nucleus                                               | metal ion binding;protein binding                                                                                |
| 6187   | cell organization and biogenesis;metabolic process;regulation of biological process;transport                                                                                          | cytosol;membrane;nucleus;ribosome                                                             | protein binding;RNA binding;structural molecule activity                                                         |
| 10394  | metabolic process;regulation of biological process;response to stimulus;transport                                                                                                      | extracellular;organelle lumen                                                                 |                                                                                                                  |
| 11717  | cell organization and biogenesis;metabolic process;regulation of biological process                                                                                                    | cytoplasm;cytosol;nucleus                                                                     | protein binding;RNA binding                                                                                      |
| 6427   | metabolic process;regulation of biological process;response to stimulus;transport                                                                                                      | cytosol;nucleus;spliceosomal complex                                                          | protein binding;RNA binding                                                                                      |
| 51382  | cell organization and biogenesis;cellular homeostasis;regulation of biological process;response to stimulus;transport                                                                  | cytosol;membrane                                                                              | catalytic activity;protein binding;transporter activity                                                          |
| 3895   | cellular component movement;metabolic process                                                                                                                                          | endoplasmic reticulum;membrane;organelle lumen                                                | protein binding;RNA binding                                                                                      |
| 5935   | metabolic process;regulation of biological process                                                                                                                                     | cytoplasm;nucleus                                                                             | protein binding;RNA binding                                                                                      |
| 6118   | cell organization and biogenesis;cellular homeostasis;metabolic process;regulation of biological process;response to stimulus                                                          | chromosome;nucleus                                                                            | DNA binding;protein binding                                                                                      |
| 1968   | metabolic process;transport                                                                                                                                                            | cytoplasm;cytosol;nucleus                                                                     | catalytic activity;nucleotide binding;protein binding;RNA binding                                                |
| 2287   | metabolic process                                                                                                                                                                      | cytoplasm;nucleus                                                                             | catalytic activity;protein binding;receptor activity;RNA binding                                                 |
| 10197  | cell death;metabolic process;regulation of biological process;response to stimulus;transport                                                                                           | cytoplasm;cytosol;membrane;nucleus;proteasome                                                 | enzyme regulator activity;protein binding                                                                        |
| 2079   | metabolic process;regulation of biological process                                                                                                                                     |                                                                                               | DNA binding;nucleotide binding;protein binding;RNA binding                                                       |
| 8241   | metabolic process;regulation of biological process                                                                                                                                     | nucleus                                                                                       | metal ion binding;protein binding;RNA binding                                                                    |
| 6117   | cell organization and biogenesis;cellular homeostasis;metabolic process;regulation of biological process;response to stimulus                                                          | nucleus                                                                                       | DNA binding;metal ion binding;protein binding                                                                    |
| 57175  | cell organization and biogenesis;cellular component movement;regulation of biological process;response to stimulus                                                                     | cytoplasm;cytoskeleton;cytosol;membrane                                                       | protein binding                                                                                                  |

|            |                                                                                                                                                      |                                                                             |                                                                                                                     |
|------------|------------------------------------------------------------------------------------------------------------------------------------------------------|-----------------------------------------------------------------------------|---------------------------------------------------------------------------------------------------------------------|
| 9527       | cell organization and biogenesis;regulation of biological process;transport                                                                          | cytosol;Golgi;membrane                                                      | protein binding                                                                                                     |
| 1340       | metabolic process;transport                                                                                                                          | membrane;mitochondrion                                                      | catalytic activity;transporter activity                                                                             |
| 9459       | cell death;cell organization and biogenesis;metabolic process;regulation of biological process;response to stimulus                                  | cytosol                                                                     | enzyme regulator activity;protein binding                                                                           |
| 10135      | cell communication;metabolic process;regulation of biological process;response to stimulus                                                           | cytoplasm;cytosol;extracellular;nucleus                                     | catalytic activity;protein binding                                                                                  |
| 5111       | cell differentiation;cell organization and biogenesis;cell proliferation;cellular homeostasis;metabolic process;regulation of biological process     | nucleus                                                                     | catalytic activity;DNA binding;enzyme regulator activity;protein binding                                            |
| 92675      | metabolic process;regulation of biological process                                                                                                   | cytoplasm;cytosol;nucleus                                                   | catalytic activity;DNA binding;metal ion binding;RNA binding                                                        |
| 3692       | cell organization and biogenesis;metabolic process;regulation of biological process;response to stimulus;transport                                   | cytoplasm;cytosol;nucleus                                                   | protein binding;RNA binding                                                                                         |
| 960        | cell organization and biogenesis;cellular component movement;metabolic process;regulation of biological process;response to stimulus                 | cell surface;cytosol;Golgi;membrane                                         | protein binding;receptor activity;signal transducer activity                                                        |
| 15196      | response to stimulus                                                                                                                                 | membrane                                                                    | metal ion binding;protein binding                                                                                   |
| 9092       | cell organization and biogenesis;metabolic process;regulation of biological process;response to stimulus                                             | cytoplasm;cytosol;Golgi;nucleus;spliceosomal complex                        | protein binding;RNA binding                                                                                         |
| 4835       | metabolic process;regulation of biological process;response to stimulus                                                                              | cytoplasm;cytosol                                                           | catalytic activity;metal ion binding;nucleotide binding;protein binding                                             |
| 5576       | coagulation;metabolic process;regulation of biological process;response to stimulus                                                                  | cytoplasm;cytosol;membrane                                                  | catalytic activity;enzyme regulator activity;nucleotide binding;protein binding                                     |
| 30001      | cell death;cell differentiation;cell organization and biogenesis;cellular homeostasis;metabolic process;regulation of biological process             | endoplasmic reticulum;membrane;organelle lumen                              | catalytic activity;protein binding                                                                                  |
| 5723       | metabolic process;response to stimulus                                                                                                               | cytoplasm;cytosol                                                           | catalytic activity;metal ion binding;protein binding                                                                |
| 6184       | metabolic process                                                                                                                                    | cytosol;endoplasmic reticulum;membrane                                      | catalytic activity;protein binding;RNA binding                                                                      |
| 3109       | cell organization and biogenesis;regulation of biological process;response to stimulus                                                               | membrane                                                                    | protein binding                                                                                                     |
| 23234      | regulation of biological process;response to stimulus                                                                                                | cytoplasm;cytosol;membrane;nucleus                                          | protein binding                                                                                                     |
| 151690     | metabolic process                                                                                                                                    | cytosol;nucleus;spliceosomal complex                                        | protein binding;RNA binding                                                                                         |
| 131076     |                                                                                                                                                      | mitochondrion                                                               |                                                                                                                     |
| 10015      | cell death;cell division;cell organization and biogenesis;regulation of biological process;transport                                                 | cytoplasm;cytoskeleton;cytosol;extracellular;membrane                       | protein binding                                                                                                     |
| 2773       | cell division;cell organization and biogenesis;metabolic process;regulation of biological process;response to stimulus;transport                     | cytoplasm;cytoskeleton;Golgi;membrane;nucleus                               | catalytic activity;metal ion binding;nucleotide binding;protein binding;signal transducer activity                  |
| 3028       | cell organization and biogenesis;metabolic process                                                                                                   | cytoplasm;membrane;mitochondrion;organelle lumen                            | catalytic activity;protein binding;RNA binding                                                                      |
| 90952      | cellular component movement                                                                                                                          | membrane                                                                    | protein binding                                                                                                     |
| 6206       | cell organization and biogenesis;metabolic process;transport                                                                                         | cytoplasm;cytosol;membrane;ribosome                                         | RNA binding;structural molecule activity                                                                            |
| 670        | metabolic process;response to stimulus                                                                                                               | membrane;mitochondrion                                                      | catalytic activity                                                                                                  |
| 689        | metabolic process;regulation of biological process;transport                                                                                         | cytoplasm;cytosol;nucleus                                                   | protein binding;RNA binding                                                                                         |
| 1655       | cell differentiation;cell growth;cell organization and biogenesis;metabolic process;regulation of biological process;response to stimulus            | cytoplasm;membrane;nucleus;spliceosomal complex                             | catalytic activity;nucleotide binding;protein binding;RNA binding                                                   |
| 6342       | cell organization and biogenesis;metabolic process;regulation of biological process;transport                                                        | cytoplasm;membrane;mitochondrion;organelle lumen                            | catalytic activity;protein binding;transporter activity                                                             |
| 84836      | metabolic process;regulation of biological process                                                                                                   | cytoplasm;cytosol;nucleus                                                   | catalytic activity;protein binding                                                                                  |
| 10294      | metabolic process;regulation of biological process;response to stimulus                                                                              | cytosol;membrane                                                            | enzyme regulator activity;metal ion binding;nucleotide binding;protein binding                                      |
| 10291      | cell organization and biogenesis;metabolic process;regulation of biological process                                                                  | nucleus;spliceosomal complex                                                | protein binding;RNA binding                                                                                         |
| 9774       | cell death;metabolic process;regulation of biological process;response to stimulus                                                                   | cytoplasm;nucleus                                                           | DNA binding;protein binding;RNA binding                                                                             |
| 6191       | cell organization and biogenesis;development;metabolic process;regulation of biological process;transport                                            | cytoplasm;cytosol;membrane;ribosome                                         | protein binding;RNA binding;structural molecule activity                                                            |
| 9050       | cell organization and biogenesis;cellular component movement                                                                                         | cytoplasm;cytoskeleton;cytosol;membrane                                     | catalytic activity;motor activity;protein binding                                                                   |
| 4035       | cell proliferation;development;metabolic process;regulation of biological process;response to stimulus;transport                                     | cytoplasm;cytosol;endosome;membrane;nucleus                                 | metal ion binding;protein binding;receptor activity;RNA binding;transporter activity                                |
| 5295       | cell death;cell differentiation;cellular component movement;cellular homeostasis;defense response;metabolic process;regulation of biological process | cytoplasm;cytosol;membrane;nucleus                                          | catalytic activity;enzyme regulator activity;nucleotide binding;protein binding                                     |
| 84717      | regulation of biological process                                                                                                                     | nucleus                                                                     | protein binding                                                                                                     |
| 6230       | cell organization and biogenesis;metabolic process;transport                                                                                         | cytosol;nucleus;ribosome                                                    | catalytic activity;nucleotide binding;protein binding;RNA binding;structural molecule activity                      |
| 6403       | cellular component movement;defense response;regulation of biological process;response to stimulus;transport                                         | membrane                                                                    | protein binding                                                                                                     |
| 7265       | metabolic process                                                                                                                                    | cytosol;membrane                                                            | protein binding                                                                                                     |
| 627        | cell organization and biogenesis;regulation of biological process;response to stimulus;transport                                                     | cytoplasm;cytosol;extracellular;membrane;nucleus                            | metal ion binding;protein binding;transporter activity                                                              |
| 2969       | cellular homeostasis;metabolic process;regulation of biological process;response to stimulus                                                         | cytoplasm;membrane;nucleus                                                  | DNA binding;protein binding                                                                                         |
| 5869       | cell organization and biogenesis;regulation of biological process;response to stimulus;transport                                                     | endosome;membrane                                                           | catalytic activity;nucleotide binding;protein binding                                                               |
| 27258      | cell organization and biogenesis;metabolic process                                                                                                   | cytosol;nucleus;spliceosomal complex                                        | protein binding;RNA binding                                                                                         |
| 5705       | metabolic process;regulation of biological process;response to stimulus;transport                                                                    | cytoplasm;cytosol;membrane;nucleus;proteasome                               | catalytic activity;nucleotide binding;protein binding;RNA binding                                                   |
| 7419       | cell communication;defense response;regulation of biological process;response to stimulus;transport                                                  | membrane;mitochondrion;nucleus                                              | nucleotide binding;transporter activity                                                                             |
| 116496     | regulation of biological process;response to stimulus                                                                                                | cytoplasm;cytosol;membrane                                                  | protein binding                                                                                                     |
| 3978       | cell division;metabolic process;response to stimulus                                                                                                 | mitochondrion;nucleus                                                       | catalytic activity;DNA binding;metal ion binding;nucleotide binding                                                 |
| 51719      | cell organization and biogenesis;metabolic process;regulation of biological process;response to stimulus;transport                                   | cytoplasm;cytosol;extracellular;organelle lumen                             | catalytic activity;enzyme regulator activity;protein binding                                                        |
| 10204      | cell organization and biogenesis;regulation of biological process;transport                                                                          | cytoplasm;cytosol;membrane;nucleus                                          | protein binding;transporter activity                                                                                |
| 5531       | metabolic process;regulation of biological process;response to stimulus                                                                              | cytoplasm;cytoskeleton;cytosol;membrane;nucleus                             | catalytic activity;metal ion binding;protein binding;signal transducer activity                                     |
| 10657      | cell organization and biogenesis;cell proliferation;metabolic process;regulation of biological process;response to stimulus                          | cytoplasm;cytosol;membrane;nucleus                                          | DNA binding;protein binding;RNA binding                                                                             |
| 6727       | cell organization and biogenesis;response to stimulus;transport                                                                                      | cytoplasm;cytosol;extracellular;nucleus;organelle lumen                     | protein binding;RNA binding                                                                                         |
| 30011      | cell communication;cell death;cell organization and biogenesis;cellular component movement;metabolic process;regulation of biological process        | cytoplasm;cytoskeleton;cytosol;membrane                                     | catalytic activity;protein binding                                                                                  |
| 51138      | cell organization and biogenesis;metabolic process;response to stimulus                                                                              | cytoplasm;cytosol;nucleus                                                   | catalytic activity;protein binding                                                                                  |
| 134510     | metabolic process                                                                                                                                    | nucleus                                                                     | catalytic activity;protein binding                                                                                  |
| 306        | defense response;regulation of biological process;response to stimulus;transport                                                                     | cytoplasm;cytosol;membrane                                                  | enzyme regulator activity;metal ion binding;protein binding                                                         |
| 545        | development;metabolic process;regulation of biological process;response to stimulus                                                                  | chromosome;Golgi;nucleus                                                    | catalytic activity;DNA binding;nucleotide binding;protein binding                                                   |
| 1459       | cell communication;cell death;metabolic process;regulation of biological process;response to stimulus                                                | chromosome;cytoplasm;cytosol;membrane;nucleus                               | catalytic activity;nucleotide binding;protein binding                                                               |
| 51691      | metabolic process                                                                                                                                    | nucleus;spliceosomal complex                                                | protein binding;RNA binding                                                                                         |
| 3949       | cell organization and biogenesis;metabolic process;regulation of biological process;response to stimulus;transport                                   | cell surface;endosome;Golgi;membrane;vacuole                                | metal ion binding;protein binding;receptor activity                                                                 |
| 2280       | cell organization and biogenesis;cell proliferation;cellular homeostasis;metabolic process;regulation of biological process;response to stimulus     | cytoplasm;cytosol;endoplasmic reticulum;membrane                            | catalytic activity;protein binding;signal transducer activity                                                       |
| 8402       | metabolic process;transport                                                                                                                          | membrane;mitochondrion;nucleus                                              | RNA binding;transporter activity                                                                                    |
| 22913      | metabolic process;regulation of biological process                                                                                                   | nucleus;spliceosomal complex                                                | protein binding;RNA binding                                                                                         |
| 8942       | metabolic process;response to stimulus                                                                                                               | cytoplasm;cytosol;mitochondrion                                             | catalytic activity;protein binding                                                                                  |
| 350        | metabolic process;regulation of biological process;response to stimulus;transport                                                                    | cell surface;extracellular;organelle lumen                                  | enzyme regulator activity;protein binding                                                                           |
| 9554       | cell organization and biogenesis;regulation of biological process;transport                                                                          | endoplasmic reticulum;Golgi;membrane                                        | protein binding                                                                                                     |
| 873, 54093 | cell differentiation;metabolic process                                                                                                               | cytoplasm;cytosol                                                           | catalytic activity                                                                                                  |
| 54749      |                                                                                                                                                      | extracellular;vacuole                                                       | metal ion binding                                                                                                   |
| 4074       | cell organization and biogenesis;regulation of biological process;response to stimulus;transport                                                     | endosome;membrane;vacuole                                                   | protein binding;receptor activity;signal transducer activity;transporter activity                                   |
| 3676       | cell differentiation;cell organization and biogenesis;cellular component movement;regulation of biological process;response to stimulus              | cell surface;membrane                                                       | metal ion binding;protein binding;receptor activity;signal transducer activity                                      |
| 3263       | cellular homeostasis;metabolic process;regulation of biological process;transport                                                                    | extracellular;organelle lumen                                               | metal ion binding;protein binding;transporter activity                                                              |
| 8878       | cell communication;cell death;cell differentiation;cell organization and biogenesis;metabolic process;regulation of biological process               | cytoplasm;cytosol;endoplasmic reticulum;endosome;nucleus;vacuole            | catalytic activity;metal ion binding;protein binding                                                                |
| 16115      | cell organization and biogenesis;metabolic process                                                                                                   | cytoplasm;cytosol;membrane                                                  | catalytic activity;nucleotide binding;protein binding;RNA binding                                                   |
| 9689       | metabolic process;regulation of biological process                                                                                                   | cytoplasm;membrane                                                          | protein binding;RNA binding                                                                                         |
| 10987      | cell organization and biogenesis;metabolic process;regulation of biological process;response to stimulus;transport                                   | chromosome;cytoplasm;cytosol;nucleus                                        | catalytic activity;metal ion binding;protein binding;RNA binding                                                    |
| 1665       | metabolic process;response to stimulus                                                                                                               | cytoplasm;nucleus;spliceosomal complex                                      | catalytic activity;nucleotide binding;protein binding;RNA binding                                                   |
| 2802       | metabolic process;regulation of biological process;transport                                                                                         | cytoplasm;cytosol;Golgi;membrane;nucleus                                    | catalytic activity;motor activity;protein binding;structural molecule activity;transporter activity                 |
| 5236       | metabolic process;transport                                                                                                                          | cytoplasm;cytoskeleton;cytosol;extracellular                                | catalytic activity;metal ion binding;protein binding                                                                |
| 6627       | metabolic process;regulation of biological process;response to stimulus                                                                              | nucleus;spliceosomal complex                                                | protein binding;RNA binding                                                                                         |
| 51060      | cell differentiation;cellular homeostasis;metabolic process;regulation of biological process                                                         | endoplasmic reticulum;organelle lumen                                       | catalytic activity;protein binding                                                                                  |
| 4676       | cell organization and biogenesis                                                                                                                     | cytoplasm;nucleus                                                           | protein binding;RNA binding                                                                                         |
| 9045       | cell organization and biogenesis;metabolic process;transport                                                                                         | cytosol;membrane;ribosome                                                   | protein binding;RNA binding;structural molecule activity                                                            |
| 25996      | metabolic process                                                                                                                                    | cytoplasm;mitochondrion;nucleus;organelle lumen                             | catalytic activity                                                                                                  |
| 3065       | cell differentiation;cell organization and biogenesis;coagulation;metabolic process;regulation of biological process                                 | chromosome;cytoplasm;cytosol;nucleus                                        | catalytic activity;DNA binding;metal ion binding;protein binding                                                    |
| 29979      | cell communication;cell organization and biogenesis;metabolic process;regulation of biological process;response to stimulus                          | cytoplasm;cytosol;endoplasmic reticulum;membrane;nucleus;proteasome;vacuole | protein binding                                                                                                     |
| 11252      | cell organization and biogenesis;regulation of biological process;transport                                                                          | cytoplasm;cytoskeleton;cytosol;endosome;membrane                            | protein binding;transporter activity                                                                                |
| 55646      |                                                                                                                                                      | nucleus                                                                     | metal ion binding;protein binding;RNA binding                                                                       |
| 5202       | metabolic process;regulation of biological process                                                                                                   | cytoplasm;cytosol;mitochondrion;nucleus                                     | protein binding                                                                                                     |
| 11168      | cell organization and biogenesis;metabolic process;regulation of biological process;response to stimulus;transport                                   | cytosol;nucleus                                                             | DNA binding;metal ion binding;protein binding;RNA binding                                                           |
| 23075      | cell organization and biogenesis;cellular homeostasis;metabolic process;regulation of biological process                                             | cytoplasm;cytoskeleton;membrane;nucleus                                     | DNA binding;metal ion binding;nucleotide binding;protein binding                                                    |
| 51493      | metabolic process                                                                                                                                    | cytoplasm;cytosol;membrane;nucleus                                          | catalytic activity;metal ion binding;nucleotide binding;protein binding;RNA binding                                 |
| 3043       | cell organization and biogenesis;coagulation;metabolic process;regulation of biological process;response to stimulus;transport                       | cytosol;extracellular;organelle lumen                                       | antioxidant activity;catalytic activity;metal ion binding;protein binding;transporter activity                      |
| 58513      | cell differentiation;cell organization and biogenesis;cellular component movement;metabolic process;regulation of biological process                 | cytoplasm;cytoskeleton;cytosol;Golgi;membrane;nucleus                       | catalytic activity;metal ion binding;motor activity;nucleotide binding;protein binding;structural molecule activity |
| 10094      | cell organization and biogenesis;cellular component movement;regulation of biological process;response to stimulus                                   | cytoplasm;cytoskeleton;cytosol;membrane                                     | protein binding;structural molecule activity                                                                        |
| 2618       | metabolic process;response to stimulus                                                                                                               | cytoplasm;cytosol                                                           | catalytic activity;metal ion binding;nucleotide binding                                                             |
| 10146      | metabolic process;regulation of biological process;response to stimulus;transport                                                                    | cytoplasm;cytosol;membrane;nucleus                                          | catalytic activity;DNA binding;nucleotide binding;protein binding;RNA binding                                       |
| 1066       | cell differentiation;metabolic process;response to stimulus                                                                                          | cytosol;endoplasmic reticulum;organelle lumen                               | catalytic activity                                                                                                  |
| 27306      | metabolic process;regulation of biological process;response to stimulus                                                                              | cytoplasm;cytosol                                                           | catalytic activity;metal ion binding;protein binding                                                                |
| 3107       | regulation of biological process;response to stimulus                                                                                                | cell surface;endoplasmic reticulum;Golgi;membrane                           | protein binding                                                                                                     |
| 80150      | metabolic process                                                                                                                                    | cytoplasm;cytosol;nucleus                                                   | catalytic activity                                                                                                  |

|              |                                                                                                                                                                          |                                                                                        |                                                                                                                           |
|--------------|--------------------------------------------------------------------------------------------------------------------------------------------------------------------------|----------------------------------------------------------------------------------------|---------------------------------------------------------------------------------------------------------------------------|
| 10541        | cell organization and biogenesis;metabolic process;regulation of biological process                                                                                      | cytoplasm;nucleus                                                                      | protein binding                                                                                                           |
| 51154        | cell organization and biogenesis;metabolic process                                                                                                                       | cytoplasm;nucleus                                                                      | protein binding;RNA binding                                                                                               |
| 9138         | cell proliferation;regulation of biological process;response to stimulus                                                                                                 | cytoplasm;cytosol;membrane                                                             | enzyme regulator activity;protein binding;RNA binding                                                                     |
| 3113         | regulation of biological process;response to stimulus                                                                                                                    | cell surface;endoplasmic reticulum;endosome;Golgi;membrane;vacuole                     | receptor activity;signal transducer activity                                                                              |
| 8520         | cell organization and biogenesis;metabolic process;regulation of biological process;response to stimulus                                                                 | cytoplasm;nucleus                                                                      | catalytic activity;protein binding                                                                                        |
| 9943         | metabolic process;regulation of biological process;response to stimulus                                                                                                  | cytoplasm;cytosol                                                                      | catalytic activity;metal ion binding;nucleotide binding;protein binding;signal transducer activity                        |
| 5859         | metabolic process;regulation of biological process                                                                                                                       | cytoplasm;cytosol;organelle lumen                                                      | catalytic activity;enzyme regulator activity;nucleotide binding;protein binding                                           |
| 10694        | cell organization and biogenesis;metabolic process;regulation of biological process;transport                                                                            | cytoplasm;cytoskeleton;cytosol;extracellular;organelle lumen                           | catalytic activity;nucleotide binding;protein binding                                                                     |
| 23524        | metabolic process                                                                                                                                                        | nucleus;spliceosomal complex                                                           | nucleotide binding;protein binding;RNA binding                                                                            |
| 5702         | metabolic process;regulation of biological process;response to stimulus;transport                                                                                        | cytoplasm;cytosol;extracellular;membrane;nucleus;organelle lumen;proteasome            | catalytic activity;enzyme regulator activity;nucleotide binding;protein binding                                           |
| 1654         | cell death;cell organization and biogenesis;defense response;metabolic process;regulation of biological process;response to stimulus                                     | cytoplasm;cytosol;extracellular;membrane;nucleus;mitochondrion;nucleus;organelle lumen | catalytic activity;DNA binding;enzyme regulator activity;nucleotide binding;protein binding;RNA binding                   |
| 3921         | cell organization and biogenesis;metabolic process;transport                                                                                                             | cytoplasm;cytosol;membrane;nucleus;ribosome                                            | protein binding;receptor activity;RNA binding;structural molecule activity                                                |
| 5770         | cell organization and biogenesis;metabolic process;regulation of biological process;response to stimulus                                                                 | cytoplasm;cytosol;endoplasmic reticulum;endosome;membrane                              | catalytic activity;metal ion binding;protein binding;RNA binding                                                          |
| 8467         | cell organization and biogenesis;metabolic process;regulation of biological process                                                                                      | chromosome;nucleus                                                                     | catalytic activity;DNA binding;nucleotide binding;protein binding                                                         |
| 9601         | cellular homeostasis;metabolic process;regulation of biological process;response to stimulus;transport                                                                   | cell surface;endoplasmic reticulum;organelle lumen                                     | catalytic activity;metal ion binding;protein binding;RNA binding                                                          |
| 3315         | cellular component movement;metabolic process;regulation of biological process;response to stimulus                                                                      | cytoplasm;cytoskeleton;cytosol;membrane;nucleus;proteasome                             | enzyme regulator activity;protein binding;RNA binding                                                                     |
| 2782         | cell death;cell organization and biogenesis;cell proliferation;cellular homeostasis;metabolic process;regulation of biological process;response to stimulus              | cytosol;membrane                                                                       | catalytic activity;protein binding;signal transducer activity                                                             |
| 4706         | cell organization and biogenesis;metabolic process;transport                                                                                                             | cytosol;membrane;mitochondrion;organelle lumen                                         | catalytic activity;metal ion binding;protein binding;transporter activity                                                 |
| 23450        | cell organization and biogenesis;metabolic process;regulation of biological process                                                                                      | nucleus;spliceosomal complex                                                           | protein binding;RNA binding                                                                                               |
| 50848        | cell differentiation;cell organization and biogenesis;cellular component movement;defense response;regulation of biological process;response to stimulus                 | membrane                                                                               | protein binding;receptor activity                                                                                         |
| 29941        | cellular component movement;metabolic process;regulation of biological process;response to stimulus                                                                      | cytoplasm;Golgi;nucleus                                                                | catalytic activity;nucleotide binding;protein binding                                                                     |
| 2992         | metabolic process;transport                                                                                                                                              | cytosol;extracellular;membrane;organelle lumen                                         | catalytic activity;metal ion binding;protein binding                                                                      |
| 1478         | metabolic process                                                                                                                                                        | nucleus                                                                                | protein binding;RNA binding                                                                                               |
| 5701         | cell differentiation;metabolic process;regulation of biological process;response to stimulus;transport                                                                   | cytoplasm;cytosol;extracellular;membrane;nucleus;organelle lumen;proteasome            | catalytic activity;nucleotide binding;protein binding                                                                     |
| 5007         | metabolic process;regulation of biological process;transport                                                                                                             | cytoplasm;cytosol;endoplasmic reticulum;Golgi;membrane;nucleus                         | protein binding;transporter activity                                                                                      |
| 6734         | cell organization and biogenesis;transport                                                                                                                               | endoplasmic reticulum;membrane                                                         | catalytic activity;nucleotide binding;RNA binding                                                                         |
| 6742         | cell organization and biogenesis;metabolic process;regulation of biological process                                                                                      | mitochondrion;nucleus;organelle lumen                                                  | DNA binding;protein binding;RNA binding                                                                                   |
| 4282         | cell organization and biogenesis;cell proliferation;cellular component movement;defense response;metabolic process;regulation of biological process;response to stimulus | cell surface;cytoplasm;cytosol;extracellular;organelle lumen                           | catalytic activity;protein binding                                                                                        |
| 10856        | cell organization and biogenesis;metabolic process;regulation of biological process;response to stimulus                                                                 | cytoplasm;cytosol;membrane;nucleus                                                     | catalytic activity;DNA binding;nucleotide binding;protein binding                                                         |
| 644          | metabolic process                                                                                                                                                        | cytoplasm;cytosol                                                                      | catalytic activity;metal ion binding;protein binding                                                                      |
| 58478        | metabolic process                                                                                                                                                        | cytoplasm;cytosol;nucleus                                                              | catalytic activity;metal ion binding                                                                                      |
| 1845         | metabolic process;regulation of biological process                                                                                                                       | cytosol;nucleus                                                                        | catalytic activity;protein binding                                                                                        |
| 7345         | cell communication;cell organization and biogenesis;cell proliferation;cellular component movement;metabolic process;regulation of biological process;transport          | cytoplasm;cytosol;endoplasmic reticulum;membrane                                       | catalytic activity;protein binding                                                                                        |
| 10250        | metabolic process;transport                                                                                                                                              | cytosol;nucleus;spliceosomal complex                                                   | DNA binding;protein binding;RNA binding                                                                                   |
| 4849         | cell differentiation;development;metabolic process;regulation of biological process;response to stimulus                                                                 | cytoplasm;cytosol;nucleus                                                              | protein binding                                                                                                           |
| 8904         | cell differentiation;cell growth;metabolic process;regulation of biological process;response to stimulus;transport                                                       | cytoplasm;cytosol;membrane;nucleus                                                     | catalytic activity;metal ion binding;protein binding;transporter activity                                                 |
| 10053        | regulation of biological process;transport                                                                                                                               | cytosol;Golgi;membrane                                                                 | protein binding                                                                                                           |
| 4673         | cell organization and biogenesis;metabolic process;regulation of biological process                                                                                      | membrane;nucleus                                                                       | protein binding;RNA binding                                                                                               |
| 57095        | response to stimulus                                                                                                                                                     | nucleus                                                                                |                                                                                                                           |
| 8574         | metabolic process                                                                                                                                                        | cytoplasm;cytosol;Golgi                                                                | catalytic activity;protein binding                                                                                        |
| 1429         | cell organization and biogenesis;metabolic process                                                                                                                       | cytoplasm;cytosol                                                                      | catalytic activity;metal ion binding;nucleotide binding;RNA binding                                                       |
| 6599         | cell organization and biogenesis;metabolic process;regulation of biological process;response to stimulus                                                                 | chromosome;cytoplasm;nucleus                                                           | DNA binding;protein binding                                                                                               |
| 8766         | cell organization and biogenesis;metabolic process;regulation of biological process;response to stimulus;transport                                                       | cytoplasm;cytosol;endosome;Golgi;membrane;mitochondrion                                | catalytic activity;nucleotide binding;protein binding                                                                     |
| 1611         | cell communication;cell death;metabolic process;regulation of biological process;response to stimulus                                                                    | extracellular;membrane                                                                 | protein binding                                                                                                           |
| 3501         | cell organization and biogenesis;defense response;metabolic process;regulation of biological process;response to stimulus                                                | cytosol;extracellular;nucleus;organelle lumen;spliceosomal complex                     | catalytic activity;protein binding                                                                                        |
| 10450        | metabolic process;regulation of biological process;response to stimulus;transport                                                                                        | cytosol                                                                                | catalytic activity;protein binding;RNA binding                                                                            |
| 10380        | metabolic process                                                                                                                                                        | cytosol                                                                                | catalytic activity;metal ion binding                                                                                      |
| 5694         | metabolic process;regulation of biological process;response to stimulus;transport                                                                                        | cytoplasm;cytosol;nucleus;proteasome                                                   | catalytic activity;protein binding                                                                                        |
| 10209        | metabolic process;regulation of biological process;response to stimulus                                                                                                  | cytoplasm;nucleus                                                                      | protein binding;RNA binding                                                                                               |
| 1460         | cell communication;cell organization and biogenesis;metabolic process;regulation of biological process;response to stimulus;transport                                    | chromosome;cytoplasm;cytosol;extracellular;membrane;nucleus;organelle lumen            | catalytic activity;enzyme regulator activity;metal ion binding;protein binding                                            |
| 7177; 64499  | cell organization and biogenesis;defense response;metabolic process;response to stimulus                                                                                 | extracellular                                                                          | catalytic activity;protein binding                                                                                        |
| 25804        | cell organization and biogenesis;metabolic process                                                                                                                       | cytosol;membrane;nucleus;spliceosomal complex                                          | protein binding;RNA binding                                                                                               |
| 55911        | metabolic process;transport                                                                                                                                              | membrane                                                                               | receptor activity                                                                                                         |
| 3208         | regulation of biological process;response to stimulus                                                                                                                    | cytoplasm;cytosol;membrane                                                             | metal ion binding;protein binding                                                                                         |
| 10054        | metabolic process;regulation of biological process                                                                                                                       | cytoplasm;nucleus                                                                      | catalytic activity;enzyme regulator activity;metal ion binding;nucleotide binding;protein binding                         |
| 81027        | cell organization and biogenesis                                                                                                                                         | cytoplasm;cytoskeleton                                                                 | catalytic activity;nucleotide binding;structural molecule activity                                                        |
| 2752         | cell communication;cell organization and biogenesis;cell proliferation;metabolic process;regulation of biological process;response to stimulus                           | cytoplasm;cytosol;endoplasmic reticulum;mitochondrion;nucleus                          | catalytic activity;metal ion binding;nucleotide binding;protein binding                                                   |
| 1650         | metabolic process;response to stimulus;transport                                                                                                                         | endoplasmic reticulum;membrane                                                         | catalytic activity;protein binding                                                                                        |
| 9141         | cell death;regulation of biological process;response to stimulus                                                                                                         | cytoplasm;cytosol;nucleus                                                              | DNA binding;enzyme regulator activity;protein binding                                                                     |
| 495          | transport                                                                                                                                                                | membrane                                                                               | catalytic activity;metal ion binding;nucleotide binding;transporter activity                                              |
| 6194         | cell death;cell differentiation;cell organization and biogenesis;cell proliferation;metabolic process;regulation of biological process;response to stimulus              | cytoplasm;cytosol;membrane;nucleus;ribosome                                            | protein binding;RNA binding;structural molecule activity                                                                  |
| 6286         | cellular component movement;response to stimulus;transport                                                                                                               | cytoplasm;extracellular;membrane;nucleus;organelle lumen                               | metal ion binding;protein binding                                                                                         |
| 6726; 653226 | cell organization and biogenesis;regulation of biological process;transport                                                                                              | cytoplasm;cytosol                                                                      | protein binding;RNA binding                                                                                               |
| 55707        | transport                                                                                                                                                                | membrane                                                                               |                                                                                                                           |
| 7064         | metabolic process                                                                                                                                                        | cytoplasm;cytosol                                                                      | catalytic activity;metal ion binding                                                                                      |
| 7319         | cell organization and biogenesis;metabolic process;regulation of biological process;response to stimulus                                                                 | chromosome;cytoplasm;cytosol                                                           | catalytic activity;nucleotide binding;protein binding                                                                     |
| 152007       | regulation of biological process                                                                                                                                         | extracellular;Golgi;membrane                                                           | protein binding                                                                                                           |
| 10480        | metabolic process                                                                                                                                                        | cytoplasm;cytosol                                                                      | protein binding;RNA binding                                                                                               |
| 133619       |                                                                                                                                                                          | Golgi                                                                                  | protein binding                                                                                                           |
| 7165         | regulation of biological process                                                                                                                                         | cytoplasm                                                                              | protein binding;RNA binding                                                                                               |
| 10051        | cell division;cell organization and biogenesis;metabolic process                                                                                                         | chromosome;cytoplasm;cytosol;nucleus                                                   | nucleotide binding;protein binding                                                                                        |
| 972          | cell organization and biogenesis;cell proliferation;cellular component movement;defense response;metabolic process;regulation of biological process                      | cell surface;endoplasmic reticulum;endosome;Golgi;membrane;organelle lumen;vacuole     | protein binding;receptor activity;signal transducer activity                                                              |
| 57486        | metabolic process;regulation of biological process                                                                                                                       | cytoplasm;extracellular;membrane;mitochondrion                                         | catalytic activity;metal ion binding                                                                                      |
| 6229         | cell organization and biogenesis;metabolic process;transport                                                                                                             | cytosol;membrane;nucleus;ribosome                                                      | protein binding;RNA binding;structural molecule activity                                                                  |
| 7812         | metabolic process;regulation of biological process                                                                                                                       | cytoplasm;cytosol;Golgi;membrane                                                       | DNA binding;protein binding;RNA binding                                                                                   |
| 8943         | cell organization and biogenesis;cellular component movement;metabolic process;regulation of biological process;transport                                                | cytoplasm;Golgi;membrane                                                               | transporter activity                                                                                                      |
| 307          | cell differentiation;regulation of biological process;response to stimulus                                                                                               | cell surface;cytoplasm;membrane;nucleus                                                | enzyme regulator activity;metal ion binding;protein binding                                                               |
| 399687       | cell differentiation;cell organization and biogenesis;cellular component movement;metabolic process;regulation of biological process                                     | cell surface;cytoplasm;cytoskeleton;Golgi;membrane                                     | catalytic activity;DNA binding;motor activity;nucleotide binding;protein binding;RNA binding;structural molecule activity |
| 27339        | cell organization and biogenesis;cell proliferation;metabolic process;regulation of biological process;response to stimulus                                              | cytoplasm;cytoskeleton;membrane;nucleus;spliceosomal complex                           | catalytic activity;metal ion binding;protein binding                                                                      |
| 1656         | cell organization and biogenesis;metabolic process;regulation of biological process                                                                                      | cytoplasm;cytosol;membrane;mitochondrion;nucleus                                       | catalytic activity;nucleotide binding;protein binding;RNA binding                                                         |
| 10946        | cell organization and biogenesis;metabolic process                                                                                                                       | nucleus;spliceosomal complex                                                           | metal ion binding;protein binding;RNA binding                                                                             |
| 2734         | cellular component movement;regulation of biological process                                                                                                             | Golgi;membrane                                                                         | protein binding                                                                                                           |
| 7153         | cell differentiation;cell division;cell organization and biogenesis;metabolic process;regulation of biological process;response to stimulus                              | chromosome;cytoplasm;nucleus                                                           | catalytic activity;DNA binding;metal ion binding;nucleotide binding;protein binding;RNA binding                           |
| 475          | cellular homeostasis;response to stimulus;transport                                                                                                                      | cytosol                                                                                | metal ion binding;protein binding;transporter activity                                                                    |
| 528          | cellular homeostasis;regulation of biological process;response to stimulus;transport                                                                                     | cytoplasm;cytosol;membrane                                                             | catalytic activity;protein binding;transporter activity                                                                   |
| 39           | metabolic process                                                                                                                                                        | cytoplasm;cytosol;mitochondrion;nucleus                                                | catalytic activity;protein binding                                                                                        |
| 55313        | metabolic process;transport                                                                                                                                              | cytoplasm;cytosol;extracellular;membrane;organelle lumen                               | catalytic activity;metal ion binding                                                                                      |
| 4728         | cell organization and biogenesis;metabolic process;response to stimulus;transport                                                                                        | membrane;mitochondrion;organelle lumen                                                 | catalytic activity;metal ion binding                                                                                      |
| 6122         | cell organization and biogenesis;metabolic process;response to stimulus;transport                                                                                        | cytoplasm;cytosol;nucleus;ribosome                                                     | protein binding;RNA binding;structural molecule activity                                                                  |
| 3117         | regulation of biological process;response to stimulus                                                                                                                    | endoplasmic reticulum;endosome;Golgi;membrane;vacuole                                  | metal ion binding;receptor activity;signal transducer activity                                                            |
| 998          | cell communication;cell differentiation;cell division;cell organization and biogenesis;cellular component movement;coagulation;metabolic process                         | cytoplasm;cytoskeleton;cytosol;membrane;vacuole                                        | catalytic activity;nucleotide binding;protein binding                                                                     |
| 127281       | metabolic process                                                                                                                                                        | cytoplasm;cytosol;endoplasmic reticulum                                                | antioxidant activity;catalytic activity;nucleotide binding                                                                |
| 6448         | metabolic process                                                                                                                                                        | organelle lumen;vacuole                                                                | catalytic activity;metal ion binding                                                                                      |
| 10652        | cell organization and biogenesis;transport                                                                                                                               | cytoplasm;cytosol;endoplasmic reticulum;endosome;Golgi;membrane;mitochondrion          | catalytic activity;protein binding                                                                                        |
| 29952        | metabolic process;transport                                                                                                                                              | cytosol;extracellular;Golgi;organelle lumen;vacuole                                    | catalytic activity                                                                                                        |
| 57819        | metabolic process                                                                                                                                                        | cytosol;nucleus;spliceosomal complex                                                   | protein binding;RNA binding                                                                                               |
| 58527        |                                                                                                                                                                          |                                                                                        |                                                                                                                           |
| 9798         | cell division;cell organization and biogenesis;regulation of biological process;transport                                                                                | chromosome;cytoplasm;cytoskeleton;cytosol;extracellular;nucleus;organelle lumen        | protein binding                                                                                                           |
| 23760        | cell organization and biogenesis;metabolic process;transport                                                                                                             | cytoplasm;Golgi;membrane                                                               | transporter activity                                                                                                      |

|            |                                                                                                                                                 |                                                                                     |                                                                                                          |
|------------|-------------------------------------------------------------------------------------------------------------------------------------------------|-------------------------------------------------------------------------------------|----------------------------------------------------------------------------------------------------------|
| 22818      | transport                                                                                                                                       | cytoplasm;cytosol;Golgi;membrane                                                    |                                                                                                          |
| 58517      | metabolic process;regulation of biological process                                                                                              | cytoplasm;nucleus;spliceosomal complex                                              | protein binding;RNA binding                                                                              |
| 8530       | regulation of biological process;response to stimulus                                                                                           | cytoplasm;extracellular                                                             | enzyme regulator activity;protein binding                                                                |
| 1936       | metabolic process;regulation of biological process;response to stimulus                                                                         | cytoplasm;cytosol;endoplasmic reticulum;nucleus                                     | DNA binding;protein binding;RNA binding;signal transducer activity                                       |
| 22934      | metabolic process                                                                                                                               | cytosol                                                                             | catalytic activity;protein binding                                                                       |
| 6136       | cell organization and biogenesis;metabolic process;transport                                                                                    | cytosol;membrane;ribosome                                                           | protein binding;RNA binding;structural molecule activity                                                 |
| 6201       | cell organization and biogenesis;metabolic process;regulation of biological process;transport                                                   | cytoplasm;cytoskeleton;cytosol;membrane;nucleus;ribosome                            | protein binding;RNA binding;structural molecule activity                                                 |
| 3248       | metabolic process;regulation of biological process;response to stimulus                                                                         | cytoplasm;cytosol;membrane                                                          | catalytic activity;nucleotide binding;protein binding;receptor activity;signal transducer activity       |
| 10326      | defense response;regulation of biological process;response to stimulus;transport                                                                | membrane                                                                            | protein binding                                                                                          |
| 945        | cell communication;regulation of biological process;response to stimulus;transport                                                              | membrane;nucleus                                                                    | protein binding;receptor activity                                                                        |
| 6642       | cell organization and biogenesis;metabolic process;regulation of biological process;transport                                                   | cytoplasm;cytosol;endosome;Golgi;membrane;vacuole                                   | protein binding                                                                                          |
| 26136      | regulation of biological process                                                                                                                | cytoplasm;cytosol;membrane;nucleus                                                  | metal ion binding;protein binding;RNA binding                                                            |
|            | regulation of biological process;response to stimulus                                                                                           |                                                                                     | catalytic activity;nucleotide binding;protein binding;signal transducer activity                         |
| 3127       | regulation of biological process;response to stimulus                                                                                           | endoplasmic reticulum;endosome;Golgi;membrane;vacuole                               |                                                                                                          |
| 29086      | cell division;cell organization and biogenesis;cell proliferation;metabolic process;regulation of biological process;response to stimulus       | cytoplasm;cytosol;nucleus                                                           | protein binding                                                                                          |
| 4597       | metabolic process;regulation of biological process                                                                                              | cytosol                                                                             | catalytic activity;nucleotide binding;protein binding                                                    |
| 11313      | cellular component movement;metabolic process                                                                                                   | cytoplasm;cytosol                                                                   | catalytic activity;protein binding                                                                       |
| 10589      | metabolic process;regulation of biological process                                                                                              | nucleus                                                                             | DNA binding;protein binding                                                                              |
| 57727      | metabolic process;regulation of biological process                                                                                              | cytoskeleton;nucleus                                                                | protein binding;RNA binding                                                                              |
| 30968      | cell organization and biogenesis;cellular homeostasis;metabolic process;regulation of biological process;response to stimulus;transport         | cytoplasm;cytoskeleton;membrane;mitochondrion                                       | protein binding                                                                                          |
| 683        | metabolic process;regulation of biological process;response to stimulus;transport                                                               | extracellular;membrane                                                              | catalytic activity                                                                                       |
| 10907      | cell division;cell organization and biogenesis;cellular homeostasis;metabolic process;regulation of biological process                          | cytosol;membrane;nucleus;spliceosomal complex                                       | protein binding                                                                                          |
| 9815       | regulation of biological process                                                                                                                |                                                                                     | enzyme regulator activity;metal ion binding;protein binding                                              |
| 51765      | cell communication;cell death;cell organization and biogenesis;metabolic process;regulation of biological process;response to stimulus          | cytoplasm;cytosol;Golgi;membrane                                                    | catalytic activity;metal ion binding;nucleotide binding;protein binding;signal transducer activity       |
| 11392      | metabolic process                                                                                                                               | cytoplasm;cytosol;mitochondrion                                                     | catalytic activity;protein binding                                                                       |
| 5695       | metabolic process;regulation of biological process;response to stimulus;transport                                                               | cytoplasm;cytosol;extracellular;nucleus;organelle lumen;proteasome                  | catalytic activity;nucleotide binding;protein binding                                                    |
|            |                                                                                                                                                 |                                                                                     |                                                                                                          |
| 6434       | cell organization and biogenesis;cellular homeostasis;metabolic process;regulation of biological process;response to stimulus                   | membrane;nucleus;spliceosomal complex                                               | protein binding;RNA binding                                                                              |
| 9114       | cell organization and biogenesis;cellular homeostasis;regulation of biological process;response to stimulus;transport                           | endosome;membrane                                                                   | catalytic activity;protein binding;transporter activity                                                  |
| 7343       | metabolic process;regulation of biological process                                                                                              | nucleus                                                                             | DNA binding;protein binding;RNA binding                                                                  |
| 51667      | metabolic process;regulation of biological process;response to stimulus                                                                         | cytosol;nucleus                                                                     | protein binding                                                                                          |
| 9980       | cell organization and biogenesis;development;transport                                                                                          | cytosol;endosome;membrane                                                           |                                                                                                          |
| 10849      | metabolic process;regulation of biological process;response to stimulus                                                                         | chromosome;cytosol;mitochondrion;nucleus                                            | catalytic activity;RNA binding                                                                           |
| 9879       | metabolic process;regulation of biological process                                                                                              | cytoplasm;membrane;nucleus                                                          | catalytic activity;nucleotide binding;RNA binding                                                        |
| 23211      |                                                                                                                                                 |                                                                                     | metal ion binding;RNA binding                                                                            |
| 10949      | defense response;metabolic process;regulation of biological process;response to stimulus                                                        | nucleus                                                                             | protein binding;RNA binding                                                                              |
| 51172      | cell organization and biogenesis;metabolic process;transport                                                                                    | Golgi;membrane                                                                      | catalytic activity;protein binding                                                                       |
| 10105      | cell death;cell organization and biogenesis;metabolic process;regulation of biological process;response to stimulus                             | membrane;mitochondrion;organelle lumen                                              | catalytic activity;protein binding                                                                       |
| 7076       | cell organization and biogenesis;metabolic process;regulation of biological process;response to stimulus;transport                              | extracellular;organelle lumen                                                       | enzyme regulator activity;metal ion binding;protein binding                                              |
| 6817       | metabolic process                                                                                                                               | cytoplasm;cytosol                                                                   | catalytic activity;protein binding                                                                       |
| 51291      | regulation of biological process;response to stimulus                                                                                           | cytosol;membrane                                                                    | enzyme regulator activity;metal ion binding;protein binding                                              |
| 6168       | cell organization and biogenesis;metabolic process;transport                                                                                    | cytosol;nucleus;ribosome                                                            | metal ion binding;protein binding;RNA binding;structural molecule activity                               |
| 7913       | cell organization and biogenesis;metabolic process;regulation of biological process;response to stimulus                                        | nucleus                                                                             | DNA binding;protein binding;RNA binding                                                                  |
| 3040, 3039 | cell organization and biogenesis;metabolic process;regulation of biological process;response to stimulus;transport                              | cytosol;extracellular;membrane;organelle lumen                                      | antioxidant activity;catalytic activity;metal ion binding;protein binding;transporter activity           |
| 5901       | cell division;cell organization and biogenesis;metabolic process;regulation of biological process;response to stimulus;transport                | chromosome;cytoplasm;cytosol;endosome;membrane;nucleus                              | catalytic activity;metal ion binding;nucleotide binding;protein binding;RNA binding;transporter activity |
| 10981      | cell organization and biogenesis;regulation of biological process;response to stimulus;transport                                                | cytosol;endoplasmic reticulum;endosome;Golgi;membrane;mitochondrion;organelle lumen | catalytic activity;nucleotide binding;protein binding                                                    |
| 1036       | defense response;metabolic process;response to stimulus;transport                                                                               | cytosol                                                                             | catalytic activity;metal ion binding                                                                     |
| 515        | cell organization and biogenesis;metabolic process;transport                                                                                    | membrane;mitochondrion;nucleus;organelle lumen                                      | catalytic activity;protein binding                                                                       |
| 6301       | metabolic process;regulation of biological process                                                                                              | cytoplasm;cytosol;nucleus                                                           | catalytic activity;DNA binding;nucleotide binding;protein binding;RNA binding                            |
| 3852       | cell death;cell organization and biogenesis;metabolic process                                                                                   | cytoplasm;cytosol;membrane;mitochondrion;nucleus                                    | catalytic activity;motor activity;protein binding;structural molecule activity                           |
| 51762      | cell organization and biogenesis;regulation of biological process;response to stimulus;transport                                                | endosome;membrane;mitochondrion                                                     | catalytic activity;nucleotide binding;protein binding                                                    |
| 9040       | metabolic process;regulation of biological process;response to stimulus                                                                         | cytoplasm;cytosol                                                                   | catalytic activity;nucleotide binding;protein binding                                                    |
| 51608      | regulation of biological process;transport                                                                                                      | cytoplasm;cytosol                                                                   | protein binding                                                                                          |
| 9931       |                                                                                                                                                 | membrane;nucleus                                                                    | catalytic activity;DNA binding;metal ion binding;nucleotide binding;protein binding;RNA binding          |
| 9246       | metabolic process;regulation of biological process;response to stimulus                                                                         | cytosol                                                                             | catalytic activity;protein binding                                                                       |
| 645        | metabolic process;transport                                                                                                                     | cytoplasm;cytosol;membrane                                                          | catalytic activity                                                                                       |
| 3163       | cellular homeostasis;metabolic process;response to stimulus;transport                                                                           | endoplasmic reticulum;membrane                                                      | catalytic activity;metal ion binding;protein binding                                                     |
| 57674      | cell organization and biogenesis;metabolic process;regulation of biological process                                                             | cytoplasm;cytosol;membrane                                                          | catalytic activity;metal ion binding;protein binding                                                     |
| 9749       | regulation of biological process;transport                                                                                                      | membrane                                                                            | enzyme regulator activity;protein binding                                                                |
| 23186      | cell organization and biogenesis;coagulation;metabolic process;regulation of biological process                                                 | nucleus                                                                             | catalytic activity;DNA binding;protein binding                                                           |
| 4702       | cell organization and biogenesis;metabolic process;transport                                                                                    | membrane;mitochondrion                                                              | catalytic activity;protein binding                                                                       |
| 10788      | cell organization and biogenesis;regulation of biological process;response to stimulus;transport                                                | cell surface;cytoplasm;cytoskeleton;cytosol;membrane                                | enzyme regulator activity;protein binding                                                                |
| 10659      | cell organization and biogenesis;metabolic process;regulation of biological process                                                             | cytoplasm;nucleus                                                                   | RNA binding                                                                                              |
| 79869      | cell organization and biogenesis;metabolic process                                                                                              | membrane;nucleus                                                                    | protein binding;RNA binding                                                                              |
| 5069       | metabolic process;response to stimulus                                                                                                          | extracellular                                                                       | catalytic activity;metal ion binding                                                                     |
| 7150       | cell death;cell division;cell organization and biogenesis;metabolic process;regulation of biological process;response to stimulus               | chromosome;cytoplasm;nucleus                                                        | catalytic activity;DNA binding;nucleotide binding;protein binding;RNA binding                            |
| 1646       | cell differentiation;metabolic process;regulation of biological process;response to stimulus                                                    | cytoplasm                                                                           | catalytic activity                                                                                       |
| 22931      | cell organization and biogenesis;development;regulation of biological process;response to stimulus;transport                                    | cytosol;Golgi;membrane                                                              | catalytic activity;nucleotide binding;protein binding                                                    |
| 3843       | regulation of biological process;response to stimulus;transport                                                                                 | cytoplasm;membrane;nucleus                                                          | enzyme regulator activity;protein binding;RNA binding;transporter activity                               |
| 29937      | regulation of biological process                                                                                                                | extracellular;membrane                                                              | metal ion binding;protein binding                                                                        |
| 23111      | cell division;cell organization and biogenesis;regulation of biological process                                                                 | cytoplasm;cytosol;membrane                                                          | protein binding                                                                                          |
| 8514       | cell differentiation;metabolic process;regulation of biological process;transport                                                               | cytoplasm;cytoskeleton;cytosol;membrane                                             | catalytic activity;transporter activity                                                                  |
| 4340       |                                                                                                                                                 | membrane                                                                            | receptor activity                                                                                        |
| 55335      |                                                                                                                                                 | mitochondrion                                                                       |                                                                                                          |
| 283742     | metabolic process;regulation of biological process                                                                                              | cytoplasm;nucleus                                                                   | catalytic activity;protein binding;RNA binding                                                           |
| 9884       | cell death;metabolic process;regulation of biological process;response to stimulus;transport                                                    | cytoplasm;cytosol;nucleus                                                           | DNA binding;protein binding;RNA binding                                                                  |
| 1892       | metabolic process                                                                                                                               | mitochondrion;organelle lumen                                                       | catalytic activity;protein binding                                                                       |
| 27095      | cell organization and biogenesis;transport                                                                                                      | cytosol;endoplasmic reticulum;Golgi;membrane                                        | protein binding                                                                                          |
| 8078       | metabolic process;regulation of biological process                                                                                              | cytosol;vacuole                                                                     | catalytic activity;metal ion binding;protein binding                                                     |
| 1495       | cell organization and biogenesis;regulation of biological process;response to stimulus                                                          | cytoplasm;cytoskeleton;cytosol;Golgi;membrane                                       | protein binding;RNA binding;structural molecule activity                                                 |
| 5715       | cell organization and biogenesis;metabolic process;regulation of biological process;response to stimulus;transport                              | cytoplasm;cytosol;nucleus                                                           | protein binding                                                                                          |
| 51024      | cell death;cell organization and biogenesis;cellular homeostasis;metabolic process;regulation of biological process;response to stimulus        | endoplasmic reticulum;membrane;mitochondrion                                        | protein binding                                                                                          |
| 23114      | cell organization and biogenesis;cellular component movement;transport                                                                          | membrane                                                                            | protein binding                                                                                          |
| 1432       | cell death;cell differentiation;cell organization and biogenesis;cellular component movement;metabolic process;regulation of biological process | cytoplasm;cytosol;extracellular;mitochondrion;nucleus;organelle lumen               | catalytic activity;nucleotide binding;protein binding;signal transducer activity                         |
| 391059     | metabolic process;transport                                                                                                                     | membrane                                                                            | catalytic activity;metal ion binding                                                                     |
| 8773       | cell organization and biogenesis;metabolic process;transport                                                                                    | cytoplasm;extracellular;membrane;vacuole                                            | catalytic activity;metal ion binding                                                                     |
| 6039       | defense response;metabolic process;response to stimulus                                                                                         | extracellular                                                                       | catalytic activity                                                                                       |
| 146722     | regulation of biological process;response to stimulus                                                                                           | membrane                                                                            | protein binding                                                                                          |
| 8539       | cell death;regulation of biological process                                                                                                     | cytoplasm;membrane;nucleus;spliceosomal complex                                     | protein binding;RNA binding                                                                              |
| 10152      | cell organization and biogenesis;cellular component movement;metabolic process;regulation of biological process;response to stimulus            | cytoplasm;cytoskeleton;cytosol                                                      | DNA binding;enzyme regulator activity;protein binding                                                    |
| 81873      | cell organization and biogenesis;cellular component movement;regulation of biological process                                                   | cytoplasm;cytoskeleton                                                              | protein binding                                                                                          |
| 5714       | cell organization and biogenesis;metabolic process;regulation of biological process;response to stimulus;transport                              | cytosol;nucleus;proteasome                                                          | catalytic activity                                                                                       |
| 58155      | cell organization and biogenesis;metabolic process;regulation of biological process                                                             | nucleus;spliceosomal complex                                                        | RNA binding                                                                                              |
| 11333      | cell proliferation;regulation of biological process;response to stimulus;transport                                                              | extracellular                                                                       | RNA binding                                                                                              |
| 9402       | cell communication;cell differentiation;cellular component movement;defense response;metabolic process;regulation of biological process         | cytoplasm;cytosol;endosome;nucleus                                                  | catalytic activity;protein binding                                                                       |
| 9589       | metabolic process;regulation of biological process                                                                                              | membrane;nucleus                                                                    | protein binding                                                                                          |
| 57446      | cell differentiation;regulation of biological process;response to stimulus                                                                      | cytoplasm                                                                           |                                                                                                          |
| 57470      | metabolic process                                                                                                                               |                                                                                     | catalytic activity;protein binding;RNA binding                                                           |
| 23033      | transport                                                                                                                                       | cytosol;endosome                                                                    |                                                                                                          |
| 4671       | cell death;cell organization and biogenesis;defense response;metabolic process;regulation of biological process;response to stimulus            | cytoplasm;membrane;nucleus                                                          | catalytic activity;enzyme regulator activity;metal ion binding;nucleotide binding;protein binding        |
| 84955      |                                                                                                                                                 | cytoplasm;cytosol;nucleus                                                           | protein binding                                                                                          |
| 10890      | cell differentiation;cell organization and biogenesis;regulation of biological process;response to stimulus;transport                           | cytosol;endoplasmic reticulum;endosome;Golgi;membrane                               | catalytic activity;nucleotide binding;protein binding                                                    |

|                   |                                                                                                                                                                              |                                                                                                                         |                                                                                                                             |
|-------------------|------------------------------------------------------------------------------------------------------------------------------------------------------------------------------|-------------------------------------------------------------------------------------------------------------------------|-----------------------------------------------------------------------------------------------------------------------------|
| 3735              | metabolic process;regulation of biological process;response to stimulus                                                                                                      | cytoplasm;cytosol;extracellular;membrane;mitochondrion;nucleus;organelle lumen                                          | catalytic activity;nucleotide binding;protein binding;RNA binding                                                           |
| 23085             | development;metabolic process;regulation of biological process;transport                                                                                                     | cytoplasm;endoplasmic reticulum;Golgi;membrane                                                                          | protein binding;transporter activity                                                                                        |
| 5336              | cell differentiation;cellular homeostasis;metabolic process;regulation of biological process;response to stimulus;transport                                                  | cytosol;membrane                                                                                                        | catalytic activity;protein binding;signal transducer activity                                                               |
| 5573              | cell organization and biogenesis;cell proliferation;coagulation;metabolic process;regulation of biological process;response to stimulus                                      | cytoplasm;cytosol;membrane                                                                                              | catalytic activity;enzyme regulator activity;nucleotide binding;protein binding                                             |
| 4482              | metabolic process;response to stimulus                                                                                                                                       | cytoplasm;cytoskeleton;cytosol;membrane;mitochondrion;nucleus                                                           | catalytic activity                                                                                                          |
| 1777              | cell death;cell differentiation;development;metabolic process                                                                                                                | vacuole                                                                                                                 | catalytic activity;DNA binding                                                                                              |
| 2620              | cell death;regulation of biological process                                                                                                                                  | cytoplasm;cytoskeleton;cytosol;membrane                                                                                 | protein binding                                                                                                             |
| 3182              | cell organization and biogenesis;regulation of biological process                                                                                                            | cytoplasm;nucleus                                                                                                       | DNA binding;protein binding;RNA binding                                                                                     |
| 5203              | metabolic process                                                                                                                                                            | cytoplasm;cytosol;mitochondrion;nucleus                                                                                 | protein binding                                                                                                             |
| 51155             |                                                                                                                                                                              | cytoplasm;membrane;nucleus                                                                                              |                                                                                                                             |
| 522               | cell organization and biogenesis;metabolic process;transport                                                                                                                 | membrane;mitochondrion                                                                                                  | catalytic activity;transporter activity                                                                                     |
| 10432; 10052673   | cell organization and biogenesis;defense response;metabolic process;regulation of biological process;response to stimulus                                                    | cytoplasm;nucleus                                                                                                       | protein binding;RNA binding                                                                                                 |
| 345               | cell organization and biogenesis;metabolic process;regulation of biological process;response to stimulus;transport                                                           | endosome;extracellular                                                                                                  | enzyme regulator activity;protein binding                                                                                   |
| 145165            |                                                                                                                                                                              | cytoplasm                                                                                                               | protein binding                                                                                                             |
| 6234              | cell organization and biogenesis;metabolic process;transport                                                                                                                 | cytosol;ribosome                                                                                                        | protein binding;RNA binding;structural molecule activity                                                                    |
| 9444              | cell differentiation;development;metabolic process;regulation of biological process;transport                                                                                | cytoplasm;nucleus                                                                                                       | protein binding;RNA binding                                                                                                 |
| 93100             | metabolic process;response to stimulus;transport                                                                                                                             | cytoplasm;cytosol;extracellular;organelle lumen                                                                         | catalytic activity;protein binding                                                                                          |
| 2879              | cell organization and biogenesis;development;metabolic process;response to stimulus                                                                                          | cytoplasm;cytosol;mitochondrion;nucleus                                                                                 | antioxidant activity;catalytic activity;protein binding                                                                     |
| 23078             |                                                                                                                                                                              | mitochondrion                                                                                                           | catalytic activity;nucleotide binding                                                                                       |
| 6646              | cell differentiation;cell organization and biogenesis;metabolic process;regulation of biological process;transport                                                           | endoplasmic reticulum;membrane                                                                                          | catalytic activity;protein binding                                                                                          |
| 1069              | cell division;cell organization and biogenesis;metabolic process;regulation of biological process;response to stimulus                                                       | cytoplasm;cytoskeleton;cytosol;nucleus                                                                                  | metal ion binding;protein binding                                                                                           |
| 1191              | cell death;cell organization and biogenesis;cell proliferation;defense response;metabolic process;regulation of biological process;response to stimulus                      | cell surface;cytoplasm;cytosol;endoplasmic reticulum;extracellular;Golgi;membrane;mitochondrion;nucleus;organelle lumen | catalytic activity;protein binding                                                                                          |
| 8544              | cell differentiation;metabolic process;regulation of biological process                                                                                                      | cytoplasm;cytosol;nucleus                                                                                               | catalytic activity;metal ion binding;protein binding                                                                        |
| 63929             | metabolic process                                                                                                                                                            | mitochondrion                                                                                                           | catalytic activity;metal ion binding                                                                                        |
| 79366             | cell organization and biogenesis;metabolic process;regulation of biological process                                                                                          | chromosome;nucleus                                                                                                      | DNA binding;protein binding;RNA binding                                                                                     |
| 5303              | metabolic process                                                                                                                                                            | cytoplasm;cytoskeleton;mitochondrion;nucleus;organelle lumen                                                            | catalytic activity;DNA binding;protein binding;RNA binding                                                                  |
| 10043             | transport                                                                                                                                                                    | cytoplasm;cytosol;endosome;membrane                                                                                     | protein binding                                                                                                             |
|                   |                                                                                                                                                                              |                                                                                                                         |                                                                                                                             |
| 3145              | metabolic process                                                                                                                                                            | cytoplasm;cytosol                                                                                                       | catalytic activity                                                                                                          |
| 3845              | cell communication;cell differentiation;cell organization and biogenesis;cellular component movement;metabolic process;regulation of biological process;response to stimulus | cytoplasm;cytosol;membrane;mitochondrion                                                                                | catalytic activity;nucleotide binding;protein binding                                                                       |
| 1739              | cell communication;cell organization and biogenesis;cell proliferation;metabolic process;regulation of biological process;response to stimulus                               | cytoplasm;cytosol;endoplasmic reticulum;Golgi;membrane;nucleus                                                          | catalytic activity;protein binding;structural molecule activity;transporter activity                                        |
| 1522              | cell organization and biogenesis;metabolic process;regulation of biological process;transport                                                                                | cell surface;endoplasmic reticulum;extracellular;membrane;organelle lumen;vacuole                                       | catalytic activity;protein binding                                                                                          |
| 10592             | cell division;cell organization and biogenesis;metabolic process;regulation of biological process                                                                            | chromosome;cytoplasm;cytosol;nucleus                                                                                    | catalytic activity;motor activity;nucleotide binding;protein binding                                                        |
| 4267              | regulation of biological process                                                                                                                                             | cytoplasm;membrane                                                                                                      | protein binding                                                                                                             |
| 6728              | cell organization and biogenesis;response to stimulus;transport                                                                                                              | cytoplasm;cytosol                                                                                                       | protein binding;RNA binding                                                                                                 |
|                   |                                                                                                                                                                              |                                                                                                                         |                                                                                                                             |
| 1810              | cell organization and biogenesis;metabolic process;regulation of biological process                                                                                          | nucleus                                                                                                                 | DNA binding;protein binding                                                                                                 |
| 5903              | cell organization and biogenesis;metabolic process;regulation of biological process;response to stimulus;transport                                                           | cytoplasm;cytosol;membrane;mitochondrion;nucleus                                                                        | catalytic activity;enzyme regulator activity;metal ion binding;protein binding;RNA binding                                  |
| 7706              | defense response;metabolic process;regulation of biological process;response to stimulus                                                                                     | cytoplasm;cytosol                                                                                                       | catalytic activity;metal ion binding;motor activity;protein binding;RNA binding                                             |
| 54939             | metabolic process;regulation of biological process                                                                                                                           | cytoplasm;nucleus                                                                                                       | protein binding                                                                                                             |
| 11314             | regulation of biological process;response to stimulus;transport                                                                                                              | membrane                                                                                                                | protein binding;receptor activity;signal transducer activity                                                                |
| 55660             | cell division;cell organization and biogenesis;cellular component movement;metabolic process;regulation of biological process                                                | cytosol;membrane;nucleus;spliceosomal complex                                                                           | protein binding;RNA binding                                                                                                 |
| 10980             | cell organization and biogenesis;metabolic process;response to stimulus                                                                                                      | cytoplasm;cytosol;nucleus                                                                                               | protein binding                                                                                                             |
| 10254             | cell communication;cell organization and biogenesis;metabolic process;regulation of biological process;response to stimulus;transport                                        | cytoplasm;cytosol;endosome;membrane                                                                                     | protein binding                                                                                                             |
| 4301              | cell communication;cell organization and biogenesis;regulation of biological process;response to stimulus                                                                    | cytosol;membrane                                                                                                        | protein binding                                                                                                             |
| 2617              | metabolic process                                                                                                                                                            | cytoplasm;cytosol;extracellular;mitochondrion;organelle lumen                                                           | catalytic activity;nucleotide binding;protein binding                                                                       |
| 8829              | cell communication;cell differentiation;cell growth;cell organization and biogenesis;cellular component movement;development;regulation of biological process                | cell surface;cytosol;endosome;extracellular;membrane                                                                    | catalytic activity;enzyme regulator activity;metal ion binding;protein binding;receptor activity;signal transducer activity |
| 414061            |                                                                                                                                                                              |                                                                                                                         |                                                                                                                             |
| 3798              | cell communication;cellular component movement;metabolic process;transport                                                                                                   | cytoplasm;cytoskeleton;cytosol;membrane                                                                                 | catalytic activity;motor activity;nucleotide binding;protein binding                                                        |
| 3612              | metabolic process;regulation of biological process;response to stimulus                                                                                                      | cytoplasm;cytosol                                                                                                       | catalytic activity;metal ion binding;protein binding                                                                        |
| 4501              | regulation of biological process;response to stimulus                                                                                                                        | cytoplasm;nucleus                                                                                                       | metal ion binding;protein binding                                                                                           |
| 5437              | metabolic process;regulation of biological process;response to stimulus                                                                                                      | cytosol;nucleus                                                                                                         | catalytic activity;DNA binding                                                                                              |
| 374454            | cell death;cell organization and biogenesis                                                                                                                                  | cytoskeleton;cytosol                                                                                                    | structural molecule activity                                                                                                |
| 7979              |                                                                                                                                                                              |                                                                                                                         |                                                                                                                             |
| 30844             | cell organization and biogenesis;regulation of biological process;response to stimulus;transport                                                                             | endoplasmic reticulum;endosome;membrane;nucleus                                                                         | metal ion binding;nucleotide binding;protein binding                                                                        |
| 58472             | metabolic process                                                                                                                                                            | membrane;mitochondrion                                                                                                  | catalytic activity                                                                                                          |
| 3857              | cell death;cell organization and biogenesis                                                                                                                                  | cytosol;membrane;nucleus                                                                                                | structural molecule activity                                                                                                |
| 83592             | metabolic process                                                                                                                                                            | cytoplasm;cytosol;Golgi                                                                                                 | catalytic activity                                                                                                          |
| 84991             | metabolic process;regulation of biological process;response to stimulus                                                                                                      | nucleus;spliceosomal complex                                                                                            | protein binding;RNA binding                                                                                                 |
| 2195              | cell communication;cell organization and biogenesis;cellular component movement                                                                                              | cell surface;cytoplasm;membrane;nucleus                                                                                 | metal ion binding;protein binding                                                                                           |
| 5700              | metabolic process;regulation of biological process;response to stimulus;transport                                                                                            | cytoplasm;cytosol;membrane;nucleus;proteasome                                                                           | catalytic activity;nucleotide binding;protein binding;RNA binding                                                           |
| 118611            |                                                                                                                                                                              | cytoplasm;cytoskeleton;cytosol;membrane                                                                                 | protein binding                                                                                                             |
| 4507              | metabolic process;regulation of biological process;response to stimulus                                                                                                      | cytoplasm;cytosol;nucleus                                                                                               | catalytic activity;protein binding                                                                                          |
| 51143             | cell division;cell organization and biogenesis;cellular component movement;regulation of biological process;transport                                                        | chromosome;cytoplasm;cytoskeleton;cytosol;membrane                                                                      | catalytic activity;motor activity;nucleotide binding;protein binding;RNA binding                                            |
| 3029              | metabolic process                                                                                                                                                            | cytoplasm;cytosol;mitochondrion;organelle lumen                                                                         | catalytic activity;metal ion binding;protein binding                                                                        |
| 23                | defense response;metabolic process;regulation of biological process;response to stimulus;transport                                                                           | cytoplasm;cytosol;membrane;nucleus;ribosome                                                                             | catalytic activity;nucleotide binding;protein binding;RNA binding;translation regulator activity                            |
| 87769             | metabolic process                                                                                                                                                            |                                                                                                                         | catalytic activity;protein binding                                                                                          |
| 51206             | cellular component movement;coagulation;regulation of biological process;response to stimulus                                                                                | cell surface;membrane                                                                                                   | protein binding;receptor activity;signal transducer activity                                                                |
| 9590              | regulation of biological process;response to stimulus;transport                                                                                                              | cytoplasm;cytoskeleton;cytosol;membrane                                                                                 | protein binding                                                                                                             |
| 10075             | cell differentiation;cell organization and biogenesis;metabolic process;response to stimulus;transport                                                                       | cytoplasm;cytosol;extracellular;membrane;nucleus;organelle lumen                                                        | catalytic activity;DNA binding;protein binding;RNA binding                                                                  |
|                   |                                                                                                                                                                              |                                                                                                                         |                                                                                                                             |
| 4134              | cell division;cell organization and biogenesis;cellular component movement;regulation of biological process                                                                  | cytoplasm;cytoskeleton                                                                                                  | protein binding;RNA binding;structural molecule activity                                                                    |
| 645683            | metabolic process                                                                                                                                                            | nucleus;ribosome                                                                                                        | RNA binding;structural molecule activity                                                                                    |
| 125950            | metabolic process                                                                                                                                                            | cytoplasm;nucleus                                                                                                       | protein binding;RNA binding                                                                                                 |
| 8895              | metabolic process;regulation of biological process;response to stimulus;transport                                                                                            | cytoplasm;cytosol;membrane;mitochondrion;nucleus                                                                        | catalytic activity;protein binding;RNA binding;transporter activity                                                         |
|                   | metabolic process                                                                                                                                                            | ribosome                                                                                                                | RNA binding;structural molecule activity                                                                                    |
| 7264              | metabolic process                                                                                                                                                            | cytoplasm;cytosol                                                                                                       | catalytic activity;protein binding                                                                                          |
| 5965              | metabolic process;response to stimulus                                                                                                                                       | chromosome;cytoplasm;membrane;nucleus                                                                                   | catalytic activity;DNA binding;nucleotide binding;protein binding                                                           |
| 1410              | cell death;cell organization and biogenesis;metabolic process;regulation of biological process;response to stimulus                                                          | cell surface;cytoplasm;cytoskeleton;cytosol;Golgi;membrane;mitochondrion;nucleus                                        | metal ion binding;protein binding;structural molecule activity                                                              |
| 4925              |                                                                                                                                                                              | cytoplasm;cytosol;endoplasmic reticulum;Golgi;membrane;nucleus                                                          | DNA binding;metal ion binding;protein binding                                                                               |
| 10540             | cell organization and biogenesis;cell proliferation;regulation of biological process;transport                                                                               | chromosome;cytoplasm;cytoskeleton;cytosol;membrane                                                                      | catalytic activity;motor activity;protein binding                                                                           |
| 27161             | cell organization and biogenesis;metabolic process;regulation of biological process;response to stimulus                                                                     | cytoplasm;cytosol;membrane;nucleus                                                                                      | catalytic activity;DNA binding;metal ion binding;protein binding;RNA binding                                                |
| 8894              | cell proliferation;metabolic process;transport                                                                                                                               | cytoplasm;cytosol;nucleus                                                                                               | metal ion binding;protein binding;RNA binding                                                                               |
| 5306              | cell organization and biogenesis;metabolic process;regulation of biological process;response to stimulus;transport                                                           | cytoplasm;cytosol                                                                                                       | transporter activity                                                                                                        |
| 11052             | cell organization and biogenesis;metabolic process                                                                                                                           | membrane;nucleus                                                                                                        | protein binding;RNA binding                                                                                                 |
| 51593             | cell proliferation;metabolic process;regulation of biological process;response to stimulus                                                                                   | cytoplasm;nucleus                                                                                                       | DNA binding;protein binding;RNA binding                                                                                     |
| 9861              | metabolic process;regulation of biological process;response to stimulus;transport                                                                                            | cytosol;extracellular;organelle lumen;proteasome                                                                        | catalytic activity;enzyme regulator activity;protein binding                                                                |
| 5250              | transport                                                                                                                                                                    | membrane;mitochondrion                                                                                                  | protein binding;transporter activity                                                                                        |
| 79165             |                                                                                                                                                                              |                                                                                                                         | protein binding                                                                                                             |
| 10801             | cell division;cell organization and biogenesis;regulation of biological process                                                                                              | cytoplasm;cytoskeleton                                                                                                  | catalytic activity;nucleotide binding;protein binding                                                                       |
| 689               | metabolic process;regulation of biological process                                                                                                                           | cytosol                                                                                                                 | catalytic activity                                                                                                          |
| 9696              | cell organization and biogenesis;regulation of biological process                                                                                                            | cytoplasm;cytoskeleton;cytosol;membrane                                                                                 | protein binding;structural molecule activity                                                                                |
| 175               | metabolic process;transport                                                                                                                                                  | endoplasmic reticulum;extracellular;organelle lumen;vacuole                                                             | catalytic activity;protein binding                                                                                          |
| 2339              | cell organization and biogenesis;metabolic process;regulation of biological process;response to stimulus                                                                     | cytoplasm;cytosol;membrane                                                                                              | catalytic activity;protein binding                                                                                          |
| 3054              | cell organization and biogenesis;metabolic process;regulation of biological process;response to stimulus                                                                     | cytoplasm;membrane;nucleus                                                                                              | catalytic activity;protein binding                                                                                          |
| 6829              | cell organization and biogenesis;development;metabolic process;regulation of biological process;response to stimulus                                                         | nucleus                                                                                                                 | DNA binding;protein binding;RNA binding                                                                                     |
| 58477             | regulation of biological process;response to stimulus                                                                                                                        | cytoplasm;endoplasmic reticulum;membrane                                                                                | nucleotide binding                                                                                                          |
| 56301             | cellular component movement;transport                                                                                                                                        | membrane                                                                                                                | transporter activity                                                                                                        |
| 33; 552900; 10798 | cell organization and biogenesis;metabolic process;regulation of biological process;response to stimulus                                                                     | cytoplasm;cytosol;nucleus                                                                                               | protein binding                                                                                                             |
| 3162              | cell communication;cell death;cell organization and biogenesis;cell proliferation;cellular homeostasis;metabolic process;regulation of biological process                    | cytosol;endoplasmic reticulum;membrane;nucleus                                                                          | catalytic activity;metal ion binding;protein binding;signal transducer activity                                             |
| 25777             | cell organization and biogenesis;cellular component movement;regulation of biological process;transport                                                                      | chromosome;endosome;membrane;nucleus                                                                                    | protein binding                                                                                                             |
| 3512              | cellular component movement;defense response;regulation of biological process;response to stimulus;transport                                                                 | extracellular                                                                                                           | DNA binding;protein binding                                                                                                 |

|                 |                                                                                                                                                                              |                                                                                      |                                                                                                    |
|-----------------|------------------------------------------------------------------------------------------------------------------------------------------------------------------------------|--------------------------------------------------------------------------------------|----------------------------------------------------------------------------------------------------|
| 8832            | cellular component movement;defense response;regulation of biological process;response to stimulus                                                                           | membrane                                                                             | protein binding                                                                                    |
| 4801            | metabolic process;regulation of biological process                                                                                                                           | nucleus                                                                              | DNA binding;protein binding                                                                        |
| 7454            | cell organization and biogenesis;cellular component movement;coagulation;defense response;regulation of biological process;response to stimulus                              | cytoplasm;cytoskeleton;cytosol;membrane                                              | enzyme regulator activity;protein binding                                                          |
| 145553          | metabolic process                                                                                                                                                            |                                                                                      | catalytic activity;metal ion binding;receptor activity;signal transducer activity                  |
| 6217            | cell organization and biogenesis;metabolic process;transport                                                                                                                 | cytosol;membrane;ribosome                                                            | protein binding;RNA binding;structural molecule activity                                           |
| 116984          | regulation of biological process;response to stimulus                                                                                                                        | cytoplasm;cytosol                                                                    | enzyme regulator activity;metal ion binding;protein binding                                        |
| 10992           | metabolic process                                                                                                                                                            | nucleus;spliceosomal complex                                                         | protein binding;RNA binding                                                                        |
| 9524            | metabolic process                                                                                                                                                            | cytoplasm;endoplasmic reticulum;membrane;nucleus                                     | catalytic activity;protein binding                                                                 |
| 8455            | defense response;regulation of biological process;response to stimulus                                                                                                       | cytoplasm;extracellular;membrane                                                     | protein binding;receptor activity                                                                  |
| 2634            | regulation of biological process;response to stimulus                                                                                                                        | cytoplasm;cytoskeleton;cytosol;Golgi;membrane                                        | catalytic activity;nucleotide binding;protein binding                                              |
| 9343            | cell organization and biogenesis;metabolic process;response to stimulus                                                                                                      | cytosol;membrane;nucleus;spliceosomal complex                                        | catalytic activity;nucleotide binding;protein binding;RNA binding                                  |
| 57523           | metabolic process                                                                                                                                                            | membrane                                                                             |                                                                                                    |
| 6166            | metabolic process                                                                                                                                                            | cytoplasm;cytosol;membrane;nucleus;ribosome                                          | protein binding;structural molecule activity                                                       |
| 5870            | cellular component movement;metabolic process;regulation of biological process;response to stimulus;transport                                                                | cytosol;Golgi;membrane                                                               | catalytic activity;nucleotide binding;protein binding                                              |
| 3430            | regulation of biological process;response to stimulus                                                                                                                        | cytosol;nucleus                                                                      | protein binding                                                                                    |
| 408             | cell death;cell organization and biogenesis;metabolic process;regulation of biological process;response to stimulus;transport                                                | chromosome;cytoplasm;cytosol;membrane;nucleus                                        | catalytic activity;DNA binding;enzyme regulator activity;protein binding                           |
| 64077           | metabolic process                                                                                                                                                            | cytoplasm;cytosol;nucleus                                                            | catalytic activity;metal ion binding;protein binding;receptor activity;signal transducer activity  |
| 341676          | metabolic process;regulation of biological process                                                                                                                           |                                                                                      | catalytic activity;metal ion binding;nucleotide binding                                            |
| 51428           | cell death;cell differentiation;cell proliferation;defense response;metabolic process;regulation of biological process;response to stimulus                                  | cytoplasm;cytosol;endoplasmic reticulum;membrane;nucleus;spliceosomal complex        | catalytic activity;DNA binding;metal ion binding;nucleotide binding;protein binding;RNA binding    |
| 23557           | cell communication;cell organization and biogenesis;cellular component movement;cellular homeostasis;metabolic process;regulation of biological process;response to stimulus | cytoplasm;cytosol;Golgi;membrane;vacuole                                             | protein binding                                                                                    |
| 27074           | regulation of biological process;response to stimulus                                                                                                                        | endosome;membrane;nucleus;vacuole                                                    |                                                                                                    |
| 23558           | regulation of biological process;response to stimulus                                                                                                                        | cytoplasm;nucleus                                                                    | DNA binding;protein binding                                                                        |
| 5634            | metabolic process                                                                                                                                                            |                                                                                      | catalytic activity;metal ion binding;nucleotide binding;protein binding                            |
| 51506           | metabolic process;response to stimulus                                                                                                                                       | cytoplasm                                                                            | catalytic activity;protein binding                                                                 |
| 8655            | cell communication;cell death;cell organization and biogenesis;cellular component movement;metabolic process;regulation of biological process;response to stimulus           | chromosome;cytoplasm;cytoskeleton;cytosol;membrane;mitochondrion;nucleus             | catalytic activity;motor activity;structural molecule activity                                     |
| 2091            | cell differentiation;cell organization and biogenesis;metabolic process                                                                                                      | chromosome;membrane;nucleus                                                          | catalytic activity;protein binding;RNA binding                                                     |
| 91298           | cell differentiation                                                                                                                                                         |                                                                                      |                                                                                                    |
| 28988           | cell organization and biogenesis;regulation of biological process;response to stimulus;transport                                                                             | cytoplasm;cytoskeleton;cytosol;endosome;extracellular;Golgi;membrane;organelle lumen | enzyme regulator activity;protein binding                                                          |
| 10302736, 5101  | transport                                                                                                                                                                    | endoplasmic reticulum;Golgi;membrane                                                 |                                                                                                    |
| 10960           | regulation of biological process;transport                                                                                                                                   | cell surface;endoplasmic reticulum;Golgi;membrane                                    | metal ion binding;protein binding                                                                  |
| 8436            | cell organization and biogenesis                                                                                                                                             | cytoplasm;cytosol;membrane                                                           | protein binding                                                                                    |
| 6625            | metabolic process;regulation of biological process;response to stimulus                                                                                                      | cytoplasm;nucleus;spliceosomal complex                                               | protein binding;RNA binding                                                                        |
| 293             | cell death;cell organization and biogenesis;regulation of biological process;response to stimulus;transport                                                                  | membrane;mitochondrion;nucleus                                                       | protein binding;transporter activity                                                               |
| 8106            | metabolic process;regulation of biological process;response to stimulus;transport                                                                                            | cytoplasm;nucleus                                                                    | protein binding;RNA binding                                                                        |
| 2729            | cell organization and biogenesis;cellular homeostasis;metabolic process;regulation of biological process;response to stimulus                                                | cytosol                                                                              | catalytic activity;metal ion binding;nucleotide binding;protein binding                            |
| 6207            | cell organization and biogenesis;metabolic process;regulation of biological process;transport                                                                                | cytosol;membrane;nucleus;ribosome                                                    | protein binding;RNA binding;structural molecule activity                                           |
| 26472           | defense response;regulation of biological process;response to stimulus                                                                                                       | cytoplasm                                                                            | enzyme regulator activity                                                                          |
| 51110           | metabolic process                                                                                                                                                            | mitochondrion;organelle lumen                                                        | catalytic activity;metal ion binding;protein binding;RNA binding                                   |
| 126208          | metabolic process;regulation of biological process                                                                                                                           | nucleus                                                                              | DNA binding;metal ion binding                                                                      |
| 388946          |                                                                                                                                                                              | endoplasmic reticulum;membrane                                                       |                                                                                                    |
| 10951           | regulation of biological process                                                                                                                                             | chromosome;nucleus                                                                   | protein binding                                                                                    |
| 6160            | cell organization and biogenesis;metabolic process;transport                                                                                                                 | cytosol;membrane;ribosome                                                            | protein binding;RNA binding;structural molecule activity                                           |
| 1475            | cell death;cell differentiation;metabolic process;regulation of biological process                                                                                           | cytoplasm;cytoskeleton;cytosol                                                       | enzyme regulator activity;protein binding;structural molecule activity                             |
| 10910           | regulation of biological process                                                                                                                                             | chromosome;cytoplasm;cytosol;nucleus                                                 | protein binding                                                                                    |
| 3281            | cell differentiation;regulation of biological process                                                                                                                        | cytoskeleton;nucleus                                                                 | protein binding                                                                                    |
| 23526           | regulation of biological process;response to stimulus;transport                                                                                                              | cytoplasm;cytosol;extracellular;membrane;organelle lumen                             | enzyme regulator activity;metal ion binding;protein binding                                        |
| 91754           | cell division;cell organization and biogenesis;metabolic process                                                                                                             | cytoplasm;cytosol;nucleus                                                            | catalytic activity;metal ion binding;nucleotide binding;protein binding                            |
|                 |                                                                                                                                                                              |                                                                                      | metal ion binding                                                                                  |
| 115361          |                                                                                                                                                                              | cytoplasm;Golgi;membrane;nucleus                                                     | catalytic activity;nucleotide binding                                                              |
| 51237           | cell death;cell organization and biogenesis;regulation of biological process                                                                                                 | cytoplasm;endoplasmic reticulum;extracellular;organelle lumen                        | protein binding                                                                                    |
| 283417          | cell differentiation;development;metabolic process                                                                                                                           | membrane;nucleus                                                                     | catalytic activity                                                                                 |
| 8603            |                                                                                                                                                                              |                                                                                      |                                                                                                    |
| 23042, 10272498 | metabolic process                                                                                                                                                            | Golgi                                                                                | catalytic activity;protein binding                                                                 |
| 1486            | metabolic process                                                                                                                                                            | vacuole                                                                              | catalytic activity                                                                                 |
| 6141            | cell organization and biogenesis;metabolic process;transport                                                                                                                 | cytoplasm;cytosol;endoplasmic reticulum;membrane;nucleus;ribosome                    | RNA binding;structural molecule activity                                                           |
| 10666           | regulation of biological process;response to stimulus                                                                                                                        | cell surface;membrane                                                                | protein binding;receptor activity                                                                  |
| 29082           | cell communication;cell organization and biogenesis;metabolic process;regulation of biological process;response to stimulus;transport                                        | cytoplasm;cytosol;endosome;membrane;nucleus                                          | protein binding                                                                                    |
| 3159            | cell organization and biogenesis;metabolic process;regulation of biological process;response to stimulus;transport                                                           | chromosome;cytosol;nucleus                                                           | catalytic activity;DNA binding;protein binding                                                     |
| 3431            | metabolic process;regulation of biological process;response to stimulus                                                                                                      | nucleus                                                                              | DNA binding;metal ion binding;protein binding;signal transducer activity                           |
| 54832           | cell organization and biogenesis;transport                                                                                                                                   | cytoplasm;cytosol;membrane;mitochondrion                                             |                                                                                                    |
| 54414           | metabolic process;regulation of biological process                                                                                                                           | extracellular;vacuole                                                                | catalytic activity                                                                                 |
| 9482            | cell organization and biogenesis;regulation of biological process;transport                                                                                                  | cytosol;endoplasmic reticulum;endosome;membrane                                      | protein binding                                                                                    |
| 8548            | cell organization and biogenesis;cell proliferation;regulation of biological process;transport                                                                               | cytoplasm;Golgi;membrane;nucleus;organelle lumen                                     | DNA binding;protein binding                                                                        |
| 84687           | cell differentiation;cell organization and biogenesis;cellular component movement;development;metabolic process;regulation of biological process;response to stimulus        | cytoplasm;cytoskeleton;membrane;nucleus                                              | enzyme regulator activity;protein binding;structural molecule activity                             |
| 61333           | cell organization and biogenesis;metabolic process;transport                                                                                                                 | cytosol;membrane;nucleus;ribosome                                                    | protein binding;RNA binding;structural molecule activity                                           |
| 3796            | cell differentiation;cell division;cell organization and biogenesis;cellular component movement;development;transport                                                        | cytoplasm;cytoskeleton;cytosol;membrane;nucleus                                      | catalytic activity;motor activity;nucleotide binding;protein binding                               |
| 79002           |                                                                                                                                                                              |                                                                                      | protein binding                                                                                    |
| 9320            | metabolic process;regulation of biological process;response to stimulus                                                                                                      | cytoplasm;cytosol;nucleus                                                            | catalytic activity;protein binding                                                                 |
| 1047            | cell organization and biogenesis;metabolic process                                                                                                                           | endoplasmic reticulum;membrane                                                       | metal ion binding;protein binding                                                                  |
| 1445            | cell differentiation;cell organization and biogenesis;defense response;metabolic process;regulation of biological process;response to stimulus                               | cytoplasm;cytosol;membrane                                                           | catalytic activity;metal ion binding;nucleotide binding;protein binding                            |
| 25909           | cell division;cell organization and biogenesis;regulation of biological process;transport                                                                                    | chromosome;cytoplasm;cytosol;membrane;nucleus                                        | DNA binding;protein binding                                                                        |
| 5201            | cell organization and biogenesis;metabolic process;regulation of biological process                                                                                          | cytoplasm                                                                            | protein binding                                                                                    |
| 23028           | cell organization and biogenesis;coagulation;development;metabolic process;regulation of biological process;response to stimulus                                             | nucleus                                                                              | catalytic activity;DNA binding;nucleotide binding;protein binding                                  |
| 978             | cell organization and biogenesis;metabolic process;regulation of biological process;response to stimulus;transport                                                           | cytosol;extracellular;organelle lumen                                                | catalytic activity;metal ion binding;protein binding                                               |
| 1153            | cell organization and biogenesis;regulation of biological process;response to stimulus                                                                                       | cytoplasm;nucleus                                                                    | protein binding;RNA binding;translation regulator activity                                         |
| 10061           | transport                                                                                                                                                                    | membrane;mitochondrion                                                               | catalytic activity;nucleotide binding;transporter activity                                         |
| 4905            | cell organization and biogenesis;metabolic process;regulation of biological process;response to stimulus;transport                                                           | cytoplasm;cytosol;membrane                                                           | catalytic activity;metal ion binding;nucleotide binding;protein binding;RNA binding                |
| 9531            | cell death;metabolic process;regulation of biological process;response to stimulus                                                                                           | cytoplasm;cytosol;membrane;nucleus                                                   | enzyme regulator activity;nucleotide binding;protein binding                                       |
| 4033            | cell organization and biogenesis;transport                                                                                                                                   | chromosome;cytoplasm;cytoskeleton;endoplasmic reticulum;membrane;nucleus             |                                                                                                    |
| 51560           | regulation of biological process;response to stimulus;transport                                                                                                              | cytosol;Golgi;membrane                                                               | catalytic activity;nucleotide binding;protein binding                                              |
| 969             | regulation of biological process;response to stimulus                                                                                                                        | membrane                                                                             | metal ion binding;protein binding;receptor activity;signal transducer activity                     |
| 10092           | cell organization and biogenesis;cellular component movement;regulation of biological process;response to stimulus;transport                                                 | cytoplasm;cytoskeleton;cytosol;endosome;extracellular;organelle lumen                | protein binding;structural molecule activity                                                       |
| 3646            | metabolic process;regulation of biological process                                                                                                                           | chromosome;cytoplasm;cytosol;membrane;nucleus                                        | protein binding;RNA binding                                                                        |
| 9818            | cell organization and biogenesis;metabolic process;regulation of biological process;transport                                                                                | membrane;nucleus                                                                     | protein binding;structural molecule activity;transporter activity                                  |
| 132             | metabolic process                                                                                                                                                            | cytoplasm;cytosol;nucleus                                                            | catalytic activity;metal ion binding;nucleotide binding;RNA binding                                |
| 10542           | cell organization and biogenesis;regulation of biological process;response to stimulus                                                                                       | cytoplasm;cytosol;membrane;vacuole                                                   | protein binding;structural molecule activity                                                       |
| 81609           | regulation of biological process;response to stimulus;transport                                                                                                              | cytoplasm;cytosol;endosome;membrane                                                  | protein binding                                                                                    |
| 5092            | cell organization and biogenesis;metabolic process;regulation of biological process                                                                                          | cytoplasm;cytosol;nucleus                                                            | catalytic activity;protein binding                                                                 |
| 54453           | regulation of biological process;response to stimulus;transport                                                                                                              | cytoplasm;cytosol                                                                    | enzyme regulator activity                                                                          |
| 60491           | cell differentiation;regulation of biological process                                                                                                                        | cytoplasm;mitochondrion;nucleus                                                      | protein binding                                                                                    |
| 51386           | metabolic process                                                                                                                                                            | cytoplasm;cytosol;membrane                                                           | protein binding;RNA binding                                                                        |
| 10476           | cell organization and biogenesis;metabolic process;transport                                                                                                                 | cytosol;membrane;mitochondrion                                                       | catalytic activity;transporter activity                                                            |
| 64802           | metabolic process;response to stimulus                                                                                                                                       | nucleus                                                                              | catalytic activity;nucleotide binding;protein binding                                              |
| 10855           | metabolic process;regulation of biological process;response to stimulus;transport                                                                                            | extracellular;membrane;nucleus;organelle lumen;vacuole                               | catalytic activity;protein binding                                                                 |
| 1952            | cell organization and biogenesis;development;regulation of biological process;response to stimulus                                                                           | cytoplasm;membrane                                                                   | metal ion binding;protein binding;receptor activity;signal transducer activity                     |
| 10131           | metabolic process;regulation of biological process;response to stimulus                                                                                                      | membrane;mitochondrion;organelle lumen                                               | nucleotide binding;protein binding;RNA binding                                                     |
| 6249            | cell differentiation;cell organization and biogenesis;metabolic process;regulation of biological process;transport                                                           | chromosome;cytoplasm;cytoskeleton;cytosol;endosome;membrane                          | catalytic activity;metal ion binding;motor activity;protein binding                                |
| 2260            | cell communication;cell differentiation;cell division;cellular component movement;metabolic process;regulation of biological process;response to stimulus                    | cytoplasm;cytosol;extracellular;membrane;nucleus                                     | catalytic activity;nucleotide binding;protein binding;receptor activity;signal transducer activity |
| 261726          | regulation of biological process;response to stimulus                                                                                                                        | cytoplasm                                                                            | protein binding                                                                                    |
| 4725            | cell organization and biogenesis;metabolic process;transport                                                                                                                 | membrane;mitochondrion                                                               | catalytic activity                                                                                 |
| 1803            | cellular component movement;defense response;metabolic process;regulation of biological process;response to stimulus                                                         | cell surface;extracellular;membrane                                                  | catalytic activity;protein binding;receptor activity                                               |
| 9377            | metabolic process;transport                                                                                                                                                  | membrane;mitochondrion                                                               | catalytic activity;metal ion binding;protein binding;transporter activity                          |

|        |                                                                                                                                                  |                                                                                                 |                                                                                                     |
|--------|--------------------------------------------------------------------------------------------------------------------------------------------------|-------------------------------------------------------------------------------------------------|-----------------------------------------------------------------------------------------------------|
| 6205   | cell differentiation;cell organization and biogenesis;metabolic process;transport                                                                | cytoplasm;cytosol;membrane;ribosome                                                             | protein binding;RNA binding;structural molecule activity                                            |
| 112942 |                                                                                                                                                  | cytoplasm;nucleus                                                                               | protein binding                                                                                     |
| 1359   | metabolic process;regulation of biological process                                                                                               | extracellular                                                                                   | catalytic activity;metal ion binding                                                                |
| 7994   | cell differentiation;cell organization and biogenesis;metabolic process;regulation of biological process;response to stimulus                    | chromosome;cytosol;nucleus                                                                      | catalytic activity;DNA binding;metal ion binding;protein binding                                    |
| 53938  | metabolic process                                                                                                                                | spliceosomal complex                                                                            | catalytic activity;protein binding                                                                  |
| 83473  | metabolic process;response to stimulus                                                                                                           | cytoplasm;cytoskeleton;nucleus                                                                  | catalytic activity;nucleotide binding;protein binding;RNA binding                                   |
| 79709  |                                                                                                                                                  | endoplasmic reticulum;membrane;organelle lumen                                                  | catalytic activity                                                                                  |
| 36814  | cell organization and biogenesis;cellular component movement;regulation of biological process;response to stimulus;transport                     | cell surface;membrane                                                                           | metal ion binding;protein binding;receptor activity                                                 |
| 8905   | regulation of biological process;transport                                                                                                       | cytosol;Golgi;membrane                                                                          | protein binding;transporter activity                                                                |
| 8450   | cell organization and biogenesis;metabolic process;regulation of biological process;response to stimulus                                         | cytosol;nucleus                                                                                 | catalytic activity;DNA binding;protein binding                                                      |
| 2521   | metabolic process;regulation of biological process;response to stimulus                                                                          | cytoplasm;nucleus                                                                               | DNA binding;metal ion binding;protein binding;RNA binding                                           |
| 6169   | cell organization and biogenesis;metabolic process;regulation of biological process;transport                                                    | cytosol;ribosome                                                                                | RNA binding;structural molecule activity                                                            |
| 1891   | metabolic process                                                                                                                                | membrane;mitochondrion                                                                          | catalytic activity;protein binding                                                                  |
| 115098 | cell division                                                                                                                                    | cytoplasm;cytoskeleton                                                                          | RNA binding                                                                                         |
| 26092  | cell organization and biogenesis;regulation of biological process                                                                                | membrane;nucleus                                                                                | enzyme regulator activity;protein binding                                                           |
| 6745   | cell organization and biogenesis;regulation of biological process;transport                                                                      | endoplasmic reticulum;membrane                                                                  | protein binding                                                                                     |
| 6155   | cell organization and biogenesis;metabolic process;transport                                                                                     | cytosol;membrane;nucleus;ribosome                                                               | RNA binding;structural molecule activity                                                            |
| 3094   | cell death;metabolic process;regulation of biological process;response to stimulus                                                               | cytoplasm;cytoskeleton;cytosol;membrane;nucleus                                                 | catalytic activity;nucleotide binding;protein binding                                               |
| 5657   | cell differentiation;cell organization and biogenesis;cellular component movement;coagulation;metabolic process;regulation of biological process | cytosol;extracellular;membrane;organelle lumen                                                  | catalytic activity;protein binding                                                                  |
| 387921 | transport                                                                                                                                        | extracellular;organelle lumen                                                                   | protein binding                                                                                     |
| 833    | metabolic process                                                                                                                                | cytoplasm;cytosol                                                                               | catalytic activity;metal ion binding;nucleotide binding;protein binding;RNA binding                 |
| 9360   | metabolic process                                                                                                                                | cytosol;nucleus                                                                                 | catalytic activity;protein binding;RNA binding                                                      |
| 55183  | cell organization and biogenesis;metabolic process;regulation of biological process;response to stimulus                                         | chromosome;cytoplasm;cytoskeleton;membrane;nucleus                                              | protein binding                                                                                     |
| 4124   | cell organization and biogenesis;metabolic process;regulation of biological process                                                              | Golgi;membrane                                                                                  | catalytic activity;metal ion binding                                                                |
| 9667   | cell differentiation;metabolic process;regulation of biological process                                                                          | cytoplasm;nucleus                                                                               | DNA binding;protein binding;RNA binding                                                             |
| 54732  | cell organization and biogenesis;regulation of biological process;transport                                                                      | endoplasmic reticulum;Golgi;membrane                                                            | protein binding                                                                                     |
| 7435   | metabolic process;transport                                                                                                                      | membrane;mitochondrion                                                                          | catalytic activity;metal ion binding;protein binding                                                |
| 6810   | cell organization and biogenesis;regulation of biological process;response to stimulus;transport                                                 | cell surface;cytoplasm;cytosol;endosome;membrane;vacuole                                        | enzyme regulator activity;protein binding                                                           |
| 56267  | metabolic process                                                                                                                                | mitochondrion                                                                                   | catalytic activity;protein binding;RNA binding                                                      |
| 9669   | metabolic process;regulation of biological process                                                                                               | cytoplasm;cytosol;nucleus                                                                       | catalytic activity;metal ion binding;nucleotide binding;protein binding;RNA binding                 |
| 3635   | cell death;cellular component movement;metabolic process;regulation of biological process;response to stimulus                                   | cytoplasm;cytoskeleton;cytosol;membrane                                                         | catalytic activity;protein binding                                                                  |
| 56893  | metabolic process;regulation of biological process                                                                                               | cytoplasm;cytosol;endoplasmic reticulum;membrane;nucleus;proteasome;vacuole                     | protein binding                                                                                     |
| 26519  | cell organization and biogenesis;transport                                                                                                       | membrane;mitochondrion                                                                          | metal ion binding;protein binding;transporter activity                                              |
| 5874   | regulation of biological process;response to stimulus;transport                                                                                  | Golgi;membrane                                                                                  | catalytic activity;nucleotide binding;protein binding                                               |
| 10228  | cell organization and biogenesis;regulation of biological process;transport                                                                      | cytosol;endosome;Golgi;membrane                                                                 | protein binding                                                                                     |
| 6135   | cell organization and biogenesis;metabolic process;regulation of biological process;transport                                                    | cytoplasm;cytosol;membrane;nucleus;ribosome                                                     | protein binding;RNA binding;structural molecule activity                                            |
| 6228   | cell organization and biogenesis;metabolic process;transport                                                                                     | cytosol;membrane;ribosome                                                                       | protein binding;RNA binding;structural molecule activity                                            |
| 51115  |                                                                                                                                                  | cytoplasm;cytoskeleton;mitochondrion                                                            | protein binding                                                                                     |
| 7518   | metabolic process;regulation of biological process;response to stimulus                                                                          | chromosome;cytosol;nucleus                                                                      | catalytic activity;DNA binding;motor activity;protein binding                                       |
| 201294 | defense response;regulation of biological process;response to stimulus;transport                                                                 | cytoplasm;cytosol;endoplasmic reticulum;endosome;extracellular;membrane;organelle lumen;vacuole | protein binding                                                                                     |
| 1781   | cell division;cell organization and biogenesis;cellular component movement;regulation of biological process;transport                            | cytoplasm;cytoskeleton;cytosol;extracellular;Golgi;mitochondrion;organelle lumen                | catalytic activity;motor activity;protein binding                                                   |
| 54472  | cell communication;cell differentiation;defense response;metabolic process;regulation of biological process;response to stimulus;transport       | cytosol;cytosol;extracellular;organelle lumen                                                   | protein binding;signal transducer activity                                                          |
| 128240 | cell organization and biogenesis;metabolic process                                                                                               | cytosol;extracellular;mitochondrion;nucleus;organelle lumen                                     | catalytic activity;metal ion binding;nucleotide binding;protein binding                             |
| 1788   | cell death;cell differentiation;cell organization and biogenesis;metabolic process;regulation of biological process;response to stimulus         | chromosome;cytoplasm;nucleus                                                                    | catalytic activity;DNA binding;metal ion binding;protein binding                                    |
| 58511  | metabolic process                                                                                                                                | cytoplasm;extracellular;vacuole                                                                 | catalytic activity                                                                                  |
| 55004  | cell organization and biogenesis;regulation of biological process;response to stimulus;transport                                                 | endosome;membrane;vacuole                                                                       | protein binding;structural molecule activity                                                        |
| 9219   | cell organization and biogenesis;metabolic process;regulation of biological process                                                              | membrane;nucleus                                                                                | catalytic activity;DNA binding;metal ion binding;protein binding                                    |
| 4809   | cell organization and biogenesis;metabolic process                                                                                               | nucleus;spliceosomal complex                                                                    | protein binding;RNA binding                                                                         |
| 159    | metabolic process;response to stimulus                                                                                                           | cytoplasm;cytosol;membrane                                                                      | catalytic activity;metal ion binding;nucleotide binding;protein binding                             |
| 10211  | cell organization and biogenesis;regulation of biological process;response to stimulus;transport                                                 | cytoskeleton;endosome;membrane                                                                  | protein binding                                                                                     |
| 274    | cell differentiation;cell organization and biogenesis;cell proliferation;development;regulation of biological process;transport                  | cytoplasm;cytoskeleton;cytosol;membrane;nucleus                                                 | protein binding                                                                                     |
| 9221   | cell organization and biogenesis;metabolic process;regulation of biological process                                                              | cytoplasm;nucleus                                                                               | nucleotide binding;protein binding;RNA binding                                                      |
| 23118  | metabolic process;regulation of biological process;response to stimulus                                                                          | cytoplasm;cytosol;membrane                                                                      | metal ion binding;protein binding                                                                   |
| 5917   | metabolic process                                                                                                                                | cytoplasm;cytosol;membrane;mitochondrion;nucleus                                                | catalytic activity;nucleotide binding;protein binding;RNA binding                                   |
| 5442   | cell organization and biogenesis;metabolic process                                                                                               | mitochondrion;organelle lumen                                                                   | catalytic activity;DNA binding;protein binding;RNA binding                                          |
| 23307  | cell differentiation;cell organization and biogenesis;cellular component movement;metabolic process;regulation of biological process             | cytoplasm;cytoskeleton;endosome;extracellular;Golgi;membrane;nucleus                            | catalytic activity;motor activity;protein binding;structural molecule activity;transporter activity |
| 2533   | cell organization and biogenesis;metabolic process;regulation of biological process;response to stimulus;transport                               | cytoplasm;cytoskeleton;cytosol;membrane;nucleus                                                 | protein binding                                                                                     |
| 4034   | regulation of biological process;response to stimulus                                                                                            | cytoplasm;membrane                                                                              | protein binding                                                                                     |
| 84661  | cell organization and biogenesis;metabolic process;regulation of biological process;transport                                                    | Golgi;nucleus                                                                                   | catalytic activity;protein binding                                                                  |
| 317749 | metabolic process                                                                                                                                | extracellular                                                                                   | catalytic activity                                                                                  |
| 58490  | metabolic process;regulation of biological process                                                                                               | cytosol;nucleus                                                                                 | protein binding                                                                                     |
| 11235  | cell death;cell organization and biogenesis;cellular component movement;regulation of biological process;response to stimulus                    | cytoplasm;cytosol;Golgi;membrane                                                                | protein binding                                                                                     |
| 6907   | cell organization and biogenesis;metabolic process;regulation of biological process;response to stimulus                                         | nucleus                                                                                         | DNA binding;protein binding                                                                         |
| 7879   | cell organization and biogenesis;cellular homeostasis;metabolic process;regulation of biological process;response to stimulus;transport          | cytoplasm;cytosol;endosome;Golgi;membrane;vacuole                                               | catalytic activity;nucleotide binding;protein binding                                               |
| 210    | cell organization and biogenesis;metabolic process;regulation of biological process;response to stimulus;transport                               | cytosol;extracellular;nucleus;organelle lumen                                                   | catalytic activity;metal ion binding;protein binding                                                |
| 134492 | metabolic process                                                                                                                                | chromosome;cytoplasm;cytoskeleton;cytosol                                                       | protein binding                                                                                     |
| 5621   | cell organization and biogenesis;cellular homeostasis;metabolic process;regulation of biological process;response to stimulus                    | cell surface;cytoplasm;cytosol;endoplasmic reticulum;Golgi;membrane;nucleus                     | metal ion binding;protein binding;receptor activity;signal transducer activity                      |
| 83483  | metabolic process;regulation of biological process;response to stimulus                                                                          | cell surface;cytoplasm;membrane                                                                 | protein binding                                                                                     |
| 57187  | cell differentiation;cell division;cell organization and biogenesis;metabolic process;regulation of biological process;transport                 | nucleus                                                                                         | protein binding;RNA binding                                                                         |
| 8737   | cell death;cell organization and biogenesis;metabolic process;regulation of biological process;response to stimulus                              | cytoplasm;cytosol;membrane;mitochondrion                                                        | catalytic activity;nucleotide binding;protein binding;signal transducer activity                    |
| 2286   | metabolic process                                                                                                                                | endoplasmic reticulum;membrane                                                                  | catalytic activity;protein binding                                                                  |
| 50861  | cell organization and biogenesis;metabolic process;regulation of biological process                                                              | cytoplasm;Golgi                                                                                 | protein binding                                                                                     |
| 2823   | cell differentiation;cell organization and biogenesis;cellular component movement;regulation of biological process;transport                     | membrane                                                                                        | protein binding;transporter activity                                                                |
| 131474 | metabolic process;transport                                                                                                                      | mitochondrion                                                                                   | catalytic activity;protein binding                                                                  |
| 7965   | cell death;cell differentiation;cell organization and biogenesis;development;metabolic process;regulation of biological process                  | cytoplasm;cytosol;membrane;nucleus                                                              | protein binding;structural molecule activity                                                        |
| 1536   | cellular homeostasis;defense response;metabolic process;regulation of biological process;response to stimulus;transport                          | cytoplasm;endoplasmic reticulum;Golgi;membrane;mitochondrion                                    | catalytic activity;metal ion binding;nucleotide binding;protein binding;transporter activity        |
| 55623  | metabolic process                                                                                                                                |                                                                                                 | protein binding;RNA binding                                                                         |
| 79751  | transport                                                                                                                                        | membrane;mitochondrion                                                                          | transporter activity                                                                                |
| 7450   | cell organization and biogenesis;coagulation;metabolic process;response to stimulus;transport                                                    | endoplasmic reticulum;extracellular;organelle lumen                                             | protein binding                                                                                     |
| 2207   | cell differentiation;cell organization and biogenesis;cellular component movement;coagulation;defense response;metabolic process                 | cell surface;membrane                                                                           | protein binding;receptor activity;signal transducer activity                                        |
| 57476  |                                                                                                                                                  | membrane                                                                                        |                                                                                                     |
| 54     | defense response;metabolic process;regulation of biological process;response to stimulus                                                         | cytosol;vacuole                                                                                 | catalytic activity;metal ion binding                                                                |
| 8545   | metabolic process;regulation of biological process                                                                                               | nucleus                                                                                         | DNA binding;protein binding                                                                         |
| 6051   | metabolic process                                                                                                                                | extracellular;membrane                                                                          | catalytic activity;metal ion binding                                                                |
| 7163   | cell differentiation;transport                                                                                                                   | cytoplasm;endoplasmic reticulum                                                                 | metal ion binding;protein binding                                                                   |
| 51389  | metabolic process;regulation of biological process;response to stimulus                                                                          | cytoplasm                                                                                       | protein binding                                                                                     |
| 958    | cell organization and biogenesis;cell proliferation;cellular homeostasis;defense response;development;regulation of biological process           | cell surface;cytoplasm;extracellular;membrane                                                   | protein binding;receptor activity;signal transducer activity                                        |
| 54976  |                                                                                                                                                  |                                                                                                 |                                                                                                     |
| 4218   | cell organization and biogenesis;metabolic process;regulation of biological process;response to stimulus;transport                               | cytoplasm;cytoskeleton;cytosol;endosome;Golgi;membrane                                          | catalytic activity;nucleotide binding;protein binding                                               |
| 2060   | cell organization and biogenesis;cell proliferation;metabolic process;regulation of biological process;response to stimulus;transport            | cytoplasm;cytoskeleton;cytosol;endosome;membrane;nucleus                                        | catalytic activity;DNA binding;metal ion binding;motor activity;protein binding                     |
| 23052  | metabolic process;transport                                                                                                                      | cytosol;extracellular;membrane                                                                  | catalytic activity;metal ion binding                                                                |
| 11157  | metabolic process                                                                                                                                | cytoplasm;cytosol;nucleus;spliceosomal complex                                                  | protein binding;RNA binding                                                                         |
| 51015  | metabolic process                                                                                                                                | cytoplasm                                                                                       | catalytic activity;protein binding                                                                  |
| 65109  | metabolic process;regulation of biological process;transport                                                                                     | cytoplasm;cytosol;nucleus                                                                       | protein binding;RNA binding;transporter activity                                                    |
| 6923   | cell organization and biogenesis;metabolic process;regulation of biological process;response to stimulus                                         | cytosol;nucleus                                                                                 | protein binding                                                                                     |
| 5713   | metabolic process;regulation of biological process;response to stimulus;transport                                                                | cytosol;extracellular;membrane;nucleus;organelle lumen;proteasome                               | catalytic activity;protein binding                                                                  |
| 8664   | cell organization and biogenesis;metabolic process;regulation of biological process                                                              | cytoplasm;cytosol;membrane                                                                      | protein binding;RNA binding                                                                         |
| 3135   | defense response;regulation of biological process;response to stimulus                                                                           | extracellular;membrane                                                                          | protein binding                                                                                     |
| 2098   | metabolic process                                                                                                                                | cytoplasm;organelle lumen                                                                       | catalytic activity;protein binding                                                                  |
| 5795   | metabolic process;regulation of biological process;response to stimulus;transport                                                                | cell surface;membrane                                                                           | catalytic activity;protein binding                                                                  |
| 29085  | metabolic process;regulation of biological process                                                                                               | cytoplasm;cytosol                                                                               | catalytic activity;protein binding                                                                  |

|                   |                                                                                                                                                |                                                                                                        |                                                                                                            |
|-------------------|------------------------------------------------------------------------------------------------------------------------------------------------|--------------------------------------------------------------------------------------------------------|------------------------------------------------------------------------------------------------------------|
| 24139             | regulation of biological process                                                                                                               | cytoplasm;cytoskeleton                                                                                 | protein binding                                                                                            |
| 2037              | cell division;cell organization and biogenesis;transport                                                                                       | cytoplasm;cytoskeleton;cytosol;membrane;nucleus                                                        | protein binding;structural molecule activity                                                               |
| 10920             | cell organization and biogenesis;metabolic process;regulation of biological process;response to stimulus                                       | cytoplasm;cytosol;nucleus                                                                              | protein binding                                                                                            |
| 9130              |                                                                                                                                                | nucleus                                                                                                | RNA binding                                                                                                |
| 4688              | cellular homeostasis;defense response;metabolic process;regulation of biological process;response to stimulus;transport                        | cytoplasm;cytosol;vacuole                                                                              | catalytic activity;enzyme regulator activity;protein binding                                               |
| 6176              | cell organization and biogenesis;metabolic process;regulation of biological process;transport                                                  | cytosol;ribosome                                                                                       | enzyme regulator activity;protein binding;structural molecule activity                                     |
| 23102             | regulation of biological process;transport                                                                                                     |                                                                                                        | enzyme regulator activity;protein binding                                                                  |
| 374659            |                                                                                                                                                |                                                                                                        | catalytic activity;metal ion binding;protein binding                                                       |
| 9181              | cell division;cell organization and biogenesis;defense response;regulation of biological process;response to stimulus;transport                | cytoplasm;cytoskeleton;cytosol;Golgi;membrane                                                          | metal ion binding;protein binding                                                                          |
| 1471              | cell death;cell organization and biogenesis;defense response;metabolic process;regulation of biological process;response to stimulus           | cytoplasm;endoplasmic reticulum;endosome;extracellular;membrane;organelle lumen;vacuole                | enzyme regulator activity;protein binding                                                                  |
| 92140             | cell organization and biogenesis;regulation of biological process;response to stimulus                                                         | cytoplasm;endoplasmic reticulum;membrane;nucleus                                                       | protein binding;RNA binding                                                                                |
| 23475             | cell organization and biogenesis;metabolic process                                                                                             | cytoplasm;cytosol                                                                                      | catalytic activity;protein binding                                                                         |
| 4174              | cell division;metabolic process                                                                                                                | membrane;nucleus                                                                                       | catalytic activity;DNA binding;nucleotide binding;protein binding                                          |
| 1635              | metabolic process                                                                                                                              | cytoplasm;cytosol                                                                                      | catalytic activity;metal ion binding;protein binding                                                       |
| 1652              | metabolic process;regulation of biological process                                                                                             | cytoplasm                                                                                              | catalytic activity;protein binding                                                                         |
| 5707              | metabolic process;regulation of biological process;response to stimulus;transport                                                              | cytosol;extracellular;membrane;nucleus;organelle lumen;proteasome                                      | catalytic activity;enzyme regulator activity;protein binding                                               |
| 54951             | metabolic process;regulation of biological process                                                                                             | cytoplasm;cytosol;nucleus                                                                              | protein binding                                                                                            |
| 3059              | cell differentiation;cell organization and biogenesis;regulation of biological process;response to stimulus                                    | cytoplasm;cytosol;membrane;mitochondrion;nucleus                                                       | protein binding                                                                                            |
| 4716              | cell organization and biogenesis;metabolic process;transport                                                                                   | membrane;mitochondrion                                                                                 | catalytic activity;protein binding                                                                         |
| 4067              | cell communication;cell differentiation;cell organization and biogenesis;cellular component movement;coagulation;defense response              | cytoplasm;cytosol;Golgi;membrane;nucleus;vacuole                                                       | catalytic activity;nucleotide binding;protein binding;signal transducer activity                           |
| 29925             | metabolic process                                                                                                                              | cytoplasm;mitochondrion                                                                                | catalytic activity;nucleotide binding;protein binding                                                      |
| 3927              | regulation of biological process;transport                                                                                                     | cytoplasm;cytoskeleton                                                                                 | metal ion binding;protein binding;transporter activity                                                     |
| 441549            | cell differentiation;cell organization and biogenesis;regulation of biological process                                                         | endoplasmic reticulum;extracellular                                                                    | protein binding                                                                                            |
| 23673             | cell organization and biogenesis;regulation of biological process;transport                                                                    | endosome;Golgi;membrane                                                                                | protein binding                                                                                            |
| 4436              | cell differentiation;cell organization and biogenesis;metabolic process;regulation of biological process;response to stimulus                  | membrane;nucleus                                                                                       | catalytic activity;DNA binding;metal ion binding;nucleotide binding;protein binding                        |
| 80273             | metabolic process;regulation of biological process;transport                                                                                   | mitochondrion;nucleus;organelle lumen                                                                  | metal ion binding;protein binding                                                                          |
| 64422             | cell communication;cell organization and biogenesis;metabolic process;regulation of biological process;response to stimulus;transport          | cytoplasm;cytosol                                                                                      | enzyme regulator activity;nucleotide binding;protein binding                                               |
| 51347             | metabolic process;regulation of biological process;response to stimulus                                                                        | cytoplasm;membrane                                                                                     | catalytic activity;enzyme regulator activity;nucleotide binding;protein binding;signal transducer activity |
| 9775              | metabolic process;regulation of biological process;response to stimulus;transport                                                              | cytoplasm;cytosol;membrane;nucleus;spliceosomal complex                                                | catalytic activity;nucleotide binding;protein binding;RNA binding                                          |
| 8615              | cell organization and biogenesis;metabolic process;transport                                                                                   | cytoplasm;cytosol;endoplasmic reticulum;Golgi;membrane                                                 | protein binding;RNA binding;transporter activity                                                           |
| 8682              | cell death;metabolic process;regulation of biological process;response to stimulus;transport                                                   | cytoplasm;cytosol;nucleus                                                                              | protein binding                                                                                            |
| 4599              | cell death;cell organization and biogenesis;defense response;regulation of biological process;response to stimulus                             | cytoplasm;cytosol;endoplasmic reticulum;membrane;nucleus                                               | catalytic activity;nucleotide binding;protein binding                                                      |
| 128               | metabolic process;response to stimulus                                                                                                         | cytoplasm;cytosol;mitochondrion                                                                        | catalytic activity;metal ion binding;protein binding                                                       |
| 10594             | cell organization and biogenesis;metabolic process;response to stimulus                                                                        | membrane;nucleus;spliceosomal complex                                                                  | catalytic activity;protein binding;RNA binding                                                             |
| 10528             | metabolic process                                                                                                                              | cytoplasm;membrane;nucleus                                                                             | protein binding;RNA binding                                                                                |
| 6693              | cellular component movement;defense response;regulation of biological process;response to stimulus                                             | cell surface;membrane                                                                                  | protein binding;receptor activity;signal transducer activity                                               |
| 3161              | metabolic process;regulation of biological process                                                                                             | cell surface;cytoplasm;cytosol;membrane                                                                | protein binding                                                                                            |
| 10484             | cell organization and biogenesis;transport                                                                                                     | cytoplasm;cytosol;endoplasmic reticulum;membrane                                                       | metal ion binding;protein binding                                                                          |
| 64328             | regulation of biological process;transport                                                                                                     | cytoplasm;cytosol;nucleus                                                                              | protein binding;transporter activity                                                                       |
| 23196             |                                                                                                                                                | cytoplasm;cytosol;membrane;nucleus                                                                     | RNA binding                                                                                                |
| 81631             | cell communication;cell organization and biogenesis;metabolic process;response to stimulus                                                     | cytoplasm;cytoskeleton;cytosol;membrane;mitochondrion;vacuole                                          | protein binding                                                                                            |
| 642               | metabolic process;response to stimulus                                                                                                         | cytoplasm;cytosol;nucleus                                                                              | catalytic activity;protein binding                                                                         |
| 83699             | cellular homeostasis;regulation of biological process                                                                                          | cytoplasm;membrane;nucleus                                                                             | catalytic activity;protein binding                                                                         |
| 51260             |                                                                                                                                                | cytoplasm                                                                                              |                                                                                                            |
| 4179              | defense response;metabolic process;regulation of biological process;response to stimulus                                                       | cell surface;cytoplasm;Golgi;membrane                                                                  | catalytic activity;enzyme regulator activity;protein binding;receptor activity                             |
| 9733              | cell organization and biogenesis;cell proliferation;metabolic process;regulation of biological process                                         | cytoplasm;nucleus                                                                                      | protein binding;RNA binding                                                                                |
| 152137            |                                                                                                                                                | cytoplasm;cytosol                                                                                      | protein binding                                                                                            |
| 5706              | cell organization and biogenesis;metabolic process;regulation of biological process;response to stimulus;transport                             | cytoplasm;cytosol;membrane;nucleus;proteasome                                                          | catalytic activity;nucleotide binding;protein binding;RNA binding                                          |
| 103               | cell differentiation;cell organization and biogenesis;defense response;metabolic process;regulation of biological process;response to stimulus | cytoplasm;membrane;nucleus;spliceosomal complex                                                        | catalytic activity;DNA binding;metal ion binding;protein binding;RNA binding                               |
| 23517             | metabolic process                                                                                                                              | nucleus;spliceosomal complex                                                                           | catalytic activity;DNA binding;nucleotide binding;protein binding;RNA binding                              |
| 51747             | cell organization and biogenesis;metabolic process                                                                                             | nucleus;spliceosomal complex                                                                           | DNA binding;protein binding;RNA binding                                                                    |
| 55844             | cell division;metabolic process;regulation of biological process                                                                               | cytoplasm;cytosol                                                                                      | catalytic activity;enzyme regulator activity;protein binding                                               |
| 22978             | metabolic process                                                                                                                              | cytoplasm;cytosol                                                                                      | catalytic activity;metal ion binding;nucleotide binding;protein binding                                    |
| 79577             | cell organization and biogenesis;metabolic process;regulation of biological process;response to stimulus                                       | cytosol;nucleus                                                                                        | protein binding                                                                                            |
| 9584              | metabolic process;regulation of biological process                                                                                             | cytoskeleton;nucleus                                                                                   | protein binding;RNA binding                                                                                |
| 962               | cellular component movement;defense response;regulation of biological process;response to stimulus                                             | membrane                                                                                               | protein binding;receptor activity                                                                          |
| 3092              | cell differentiation;cell organization and biogenesis;cellular component movement;metabolic process;regulation of biological process           | cytoplasm;cytoskeleton;cytosol;Golgi;membrane;nucleus                                                  | catalytic activity;motor activity;protein binding;structural molecule activity                             |
| 10434             | metabolic process;regulation of biological process                                                                                             | cytoplasm;cytosol;mitochondrion                                                                        | catalytic activity;protein binding                                                                         |
| 4660              | regulation of biological process;response to stimulus                                                                                          | cytoplasm;cytosol                                                                                      | enzyme regulator activity;protein binding                                                                  |
| 6748              |                                                                                                                                                | endoplasmic reticulum;membrane                                                                         |                                                                                                            |
| 51071             | metabolic process;transport                                                                                                                    | cytoplasm;cytosol;extracellular;nucleus;organelle lumen                                                | catalytic activity                                                                                         |
| 81611             | cell organization and biogenesis;regulation of biological process;transport                                                                    | cytoplasm;nucleus                                                                                      | enzyme regulator activity;protein binding                                                                  |
| 26999             | cell death;cell growth;cell organization and biogenesis;metabolic process;regulation of biological process;response to stimulus                | cytoplasm;cytosol;membrane;nucleus                                                                     | protein binding                                                                                            |
| 6708              | cell organization and biogenesis;cellular component movement;metabolic process;regulation of biological process;response to stimulus           | cytoplasm;cytoskeleton;cytosol;membrane                                                                | metal ion binding;protein binding;structural molecule activity                                             |
| 5718              | metabolic process;regulation of biological process;response to stimulus;transport                                                              | cytoplasm;cytosol;extracellular;membrane;organelle lumen;proteasome                                    | catalytic activity;protein binding                                                                         |
| 2219              | defense response;metabolic process;regulation of biological process;response to stimulus;transport                                             | extracellular;membrane;organelle lumen                                                                 | catalytic activity;metal ion binding;protein binding;receptor activity;signal transducer activity          |
| 2182              | cell differentiation;metabolic process;regulation of biological process;response to stimulus;transport                                         | cytoplasm;endoplasmic reticulum;membrane;mitochondrion                                                 | catalytic activity;nucleotide binding                                                                      |
| 7791              | cell communication;cell organization and biogenesis;regulation of biological process;response to stimulus                                      | cytoplasm;cytoskeleton;cytosol;membrane;nucleus                                                        | metal ion binding;protein binding;RNA binding                                                              |
| 6717              | metabolic process;regulation of biological process;response to stimulus;transport                                                              | cytoplasm;cytosol;endoplasmic reticulum;membrane;mitochondrion                                         | catalytic activity;metal ion binding;protein binding                                                       |
| 411               | cell organization and biogenesis;cellular component movement;metabolic process;regulation of biological process;response to stimulus           | cell surface;endoplasmic reticulum;extracellular;Golgi;mitochondrion;organelle lumen;vacuole           | catalytic activity;metal ion binding                                                                       |
| 55727             | development                                                                                                                                    | nucleus                                                                                                | protein binding                                                                                            |
| 55737             | cell organization and biogenesis;regulation of biological process;response to stimulus;transport                                               | cytoplasm;cytosol;endosome;membrane;mitochondrion;vacuole                                              | protein binding;transporter activity                                                                       |
| 84154             | cell organization and biogenesis;metabolic process;regulation of biological process                                                            | nucleus                                                                                                | RNA binding                                                                                                |
| 9146              | cell communication;cell organization and biogenesis;metabolic process;regulation of biological process;response to stimulus;transport          | cytoplasm;cytosol;endosome;membrane;vacuole                                                            | catalytic activity;metal ion binding;protein binding                                                       |
| 84988             |                                                                                                                                                | membrane                                                                                               | protein binding                                                                                            |
| 55665             |                                                                                                                                                | cytoplasm;cytosol;nucleus                                                                              | nucleotide binding                                                                                         |
| 292               | regulation of biological process;transport                                                                                                     | membrane;mitochondrion;nucleus                                                                         | protein binding;RNA binding;transporter activity                                                           |
| 5130              | metabolic process                                                                                                                              | cytoplasm;cytosol;endoplasmic reticulum;membrane                                                       | catalytic activity;protein binding                                                                         |
| 5604              | cell differentiation;cell proliferation;cellular component movement;metabolic process;regulation of biological process;response to stimulus    | cytoplasm;cytoskeleton;cytosol;endoplasmic reticulum;endosome;Golgi;membrane;mitochondrion;nucleus     | catalytic activity;enzyme regulator activity;nucleotide binding;protein binding;signal transducer activity |
| 35: 100526664; 95 | defense response;regulation of biological process;response to stimulus;transport                                                               | membrane                                                                                               | protein binding;receptor activity;signal transducer activity                                               |
| 5198              | metabolic process;response to stimulus                                                                                                         | cytoplasm;cytosol                                                                                      | catalytic activity;metal ion binding;nucleotide binding                                                    |
| 55651             | cell organization and biogenesis;metabolic process                                                                                             | nucleus                                                                                                | protein binding;RNA binding                                                                                |
| 55577             | metabolic process                                                                                                                              | cytosol                                                                                                | catalytic activity;nucleotide binding;protein binding                                                      |
| 10653             | cell organization and biogenesis;cellular component movement;regulation of biological process;response to stimulus                             | cytoplasm;extracellular;membrane                                                                       | enzyme regulator activity                                                                                  |
| 4542              |                                                                                                                                                |                                                                                                        | catalytic activity;motor activity;nucleotide binding;protein binding                                       |
| 8666              | metabolic process                                                                                                                              | cytoplasm;cytosol;nucleus                                                                              | protein binding;RNA binding                                                                                |
| 164               | cell organization and biogenesis;regulation of biological process;transport                                                                    | cytoplasm;cytosol;endosome;Golgi;membrane                                                              | protein binding;transporter activity                                                                       |
| 4116              | metabolic process;regulation of biological process;transport                                                                                   | cytoplasm;nucleus;spliceosomal complex                                                                 | protein binding;RNA binding                                                                                |
| 2614              | cell organization and biogenesis;coagulation;metabolic process;response to stimulus                                                            | membrane                                                                                               | protein binding                                                                                            |
| 9368              | cell differentiation;cell organization and biogenesis;cellular homeostasis;regulation of biological process;response to stimulus;transport     | cytoplasm;cytoskeleton;membrane;nucleus                                                                | protein binding;structural molecule activity                                                               |
| 57103             | cell death;metabolic process;regulation of biological process;response to stimulus                                                             | cytoplasm;cytosol;membrane;mitochondrion;nucleus                                                       | catalytic activity;protein binding                                                                         |
| 3416              | cell organization and biogenesis;cellular homeostasis;metabolic process;regulation of biological process;response to stimulus                  | cell surface;cytoplasm;cytosol;extracellular;membrane;mitochondrion;nucleus;organelle lumen;proteasome | catalytic activity;metal ion binding;nucleotide binding;protein binding;receptor activity                  |
| 23451             | cell organization and biogenesis;metabolic process;regulation of biological process;response to stimulus                                       | nucleus;spliceosomal complex                                                                           | DNA binding;protein binding;receptor activity;RNA binding;signal transducer activity                       |
| 961               | cell organization and biogenesis;cellular component movement;regulation of biological process;response to stimulus;transport                   | membrane                                                                                               | protein binding;receptor activity;signal transducer activity                                               |
| 8301              | cell organization and biogenesis;cell proliferation;metabolic process;regulation of biological process;response to stimulus;transport          | cell surface;cytosol;endosome;Golgi;membrane;nucleus                                                   | protein binding                                                                                            |
| 9647              | cell death;cell organization and biogenesis;metabolic process;regulation of biological process;response to stimulus                            | cytosol                                                                                                | catalytic activity;metal ion binding;protein binding                                                       |
| 3032              | metabolic process                                                                                                                              | endoplasmic reticulum;membrane;mitochondrion                                                           | catalytic activity;protein binding;RNA binding                                                             |
| 6921              | metabolic process;regulation of biological process;response to stimulus                                                                        | cytosol;nucleus                                                                                        | catalytic activity;protein binding;RNA binding                                                             |
| 6193              | cell organization and biogenesis;metabolic process;regulation of biological process;transport                                                  | cytosol;membrane;ribosome                                                                              | protein binding;RNA binding;structural molecule activity                                                   |
| 573               | cell death;metabolic process;regulation of biological process;response to stimulus                                                             | cytoplasm;cytosol;nucleus                                                                              | enzyme regulator activity;nucleotide binding;protein binding;signal transducer activity                    |
| 11165             | cell communication;metabolic process                                                                                                           | cytoplasm;cytosol;nucleus                                                                              | catalytic activity;metal ion binding                                                                       |

|        |                                                                                                                                              |                                                                 |                                                                                                |
|--------|----------------------------------------------------------------------------------------------------------------------------------------------|-----------------------------------------------------------------|------------------------------------------------------------------------------------------------|
| 6637   | cell organization and biogenesis;metabolic process;transport                                                                                 | cytoplasm;cytosol;nucleus;spliceosomal complex                  | protein binding;RNA binding;structural molecule activity                                       |
| 83641  |                                                                                                                                              |                                                                 |                                                                                                |
| 5552   | cell death;cell organization and biogenesis;metabolic process;regulation of biological process;response to stimulus;transport                | extracellular;Golgi;membrane;organelle lumen;vacuole            | protein binding                                                                                |
| 125061 | metabolic process                                                                                                                            | cytoplasm;cytosol;nucleus                                       | catalytic activity                                                                             |
| 9525   | cell communication;cell division;cell organization and biogenesis;metabolic process;regulation of biological process;response to stimulus    | cytoplasm;cytosol;endosome;membrane;nucleus                     | catalytic activity;nucleotide binding;protein binding;RNA binding                              |
| 5019   | metabolic process;regulation of biological process;response to stimulus                                                                      | mitochondrion;organelle lumen                                   | catalytic activity;protein binding                                                             |
| 55573  | cell proliferation                                                                                                                           | cytoplasm                                                       |                                                                                                |
| 5331   | cell communication;cell organization and biogenesis;metabolic process;regulation of biological process;response to stimulus                  | cytoskeleton;cytosol;membrane                                   | catalytic activity;metal ion binding;motor activity;protein binding;signal transducer activity |
| 509    | cell organization and biogenesis;metabolic process;transport                                                                                 | membrane;mitochondrion;organelle lumen                          | catalytic activity;RNA binding;transporter activity                                            |
| 91526  |                                                                                                                                              |                                                                 | protein binding                                                                                |
| 79031  | cell death;metabolic process;regulation of biological process                                                                                | cytoplasm;cytosol;nucleus                                       | catalytic activity;protein binding                                                             |
| 4204   | cell communication;cell differentiation;cell organization and biogenesis;defense response;metabolic process;regulation of biological process | cytoplasm;cytosol;mitochondrion;nucleus                         | DNA binding;nucleotide binding;protein binding;RNA binding                                     |
| 23163  | metabolic process;regulation of biological process;transport                                                                                 | endosome;Golgi;membrane                                         | protein binding                                                                                |
| 5434   | metabolic process;regulation of biological process;response to stimulus                                                                      | cytosol;nucleus                                                 | catalytic activity;DNA binding;protein binding                                                 |
| 9129   | cell organization and biogenesis;metabolic process                                                                                           | cytosol;nucleus;spliceosomal complex                            | protein binding;RNA binding                                                                    |
| 150684 | metabolic process;regulation of biological process;transport                                                                                 | cytoplasm;cytosol;endosome;membrane;nucleus                     | metal ion binding;protein binding                                                              |
| 1785   | cell organization and biogenesis;metabolic process;regulation of biological process;response to stimulus;transport                           | cytoplasm;cytoskeleton;cytosol;endosome;Golgi;membrane;nucleus  | catalytic activity;nucleotide binding;protein binding                                          |
| 54927  | cell organization and biogenesis;metabolic process;regulation of biological process                                                          | cytoplasm;membrane;mitochondrion;nucleus                        | protein binding;structural molecule activity                                                   |
| 2801   | cell division;cell organization and biogenesis;metabolic process;regulation of biological process;transport                                  | cytoplasm;cytoskeleton;Golgi;membrane;nucleus                   | catalytic activity;motor activity;protein binding                                              |
| 26058  | cell differentiation;metabolic process;regulation of biological process;response to stimulus                                                 | cytoplasm;cytosol;endoplasmic reticulum;endosome;Golgi;membrane | protein binding;RNA binding                                                                    |
